# Supplementary material
Source: PubMed Central journal article supplement (PMC8566604)

**Table S1: Area information.** An area was defined as the grid containing the center point of each location and covering its surrounding grids. The table below for the number of grids considered and other area information.

| Area                       | Prefecture | Number of grids considered | Average number of passengers getting on and off per day at the station in 2017 * | Date of the declaration of a state of emergency |                  |
|----------------------------|------------|----------------------------|----------------------------------------------------------------------------------|-------------------------------------------------|------------------|
|                            |            |                            |                                                                                  | First                                           | Second           |
| Susukino Station           | Hokkaido   | 9                          | 39,752                                                                           | April 16, 2020                                  |                  |
| Odori Station              | Hokkaido   | 9                          | 159,694                                                                          | April 16, 2020                                  |                  |
| Central Hirosaki Station   | Aomori     | 9                          | 767                                                                              | April 16, 2020                                  |                  |
| Kotodai-Koen Station       | Miyagi     | 9                          | 33,646                                                                           | April 16, 2020                                  |                  |
| Tobu-Utsunomiya station    | Tochigi    | 9                          | 9,894                                                                            | April 16, 2020                                  | January 13, 2021 |
| Chuo Maebashi Station      | Gunma      | 9                          | 1,702                                                                            | April 16, 2020                                  |                  |
| Shibuya Station            | Tokyo      | 14                         | 224,784                                                                          | April 7, 2020                                   | January 7, 2021  |
| Shibuya Center Street      | Tokyo      | 9                          | NA / Shibuya Center Street is one of the biggest downtown areas in Tokyo.        | April 7, 2020                                   | January 7, 2021  |
| Harajuku Station           | Tokyo      | 9                          | 152,168                                                                          | April 7, 2020                                   | January 7, 2021  |
| Shinjuku Kabukicho         | Tokyo      | 9                          | NA / Shinjuku Kabukicho is one of Tokyo's largest entertainment districts.       | April 7, 2020                                   | January 7, 2021  |
| Ikebukuro Station          | Tokyo      | 9                          | 568,316                                                                          | April 7, 2020                                   | January 7, 2021  |
| Tokyo Station              | Tokyo      | 9                          | 1,090,666                                                                        | April 7, 2020                                   | January 7, 2021  |
| Shinbashi Station          | Tokyo      | 14                         | 958,018                                                                          | April 7, 2020                                   | January 7, 2021  |
| Shinagawa Station          | Tokyo      | 9                          | 1,028,462                                                                        | April 7, 2020                                   | January 7, 2021  |
| Ueno Station               | Tokyo      | 9                          | 578,406                                                                          | April 7, 2020                                   | January 7, 2021  |
| Ginza Station              | Tokyo      | 9                          | 266,574                                                                          | April 7, 2020                                   | January 7, 2021  |
| Roppongi Station           | Tokyo      | 9                          | 235,489                                                                          | April 7, 2020                                   | January 7, 2021  |
| Kichijoji Station          | Tokyo      | 9                          | 430,717                                                                          | April 7, 2020                                   | January 7, 2021  |
| Motomachi-Chukagai Station | Kanagawa   | 9                          | 62,659                                                                           | April 7, 2020                                   | January 7, 2021  |
| Sakuragicho Station        | Kanagawa   | 9                          | 178,396                                                                          | April 7, 2020                                   | January 7, 2021  |
| Kannai Station             | Kanagawa   | 9                          | 155,171                                                                          | April 7, 2020                                   | January 7, 2021  |
| Hamamatsu Station          | Shizuoka   | 9                          | 73,512 **                                                                        | April 16, 2020                                  |                  |
| Sakae Station              | Aichi      | 9                          | 230,805                                                                          | April 16, 2020                                  | January 13, 2021 |

|                         |           |   |         |                |                  |
|-------------------------|-----------|---|---------|----------------|------------------|
| Fushimi Station         | Aichi     | 9 | 96,176  | April 16, 2020 | January 13, 2021 |
| Kawaramachi Station     | Kyoto     | 9 | 78,477  | April 16, 2020 | January 13, 2021 |
| Shinsaibashi Station    | Osaka     | 9 | 148,155 | April 7, 2020  | January 13, 2021 |
| Namba Station           | Osaka     | 9 | 607,584 | April 7, 2020  | January 13, 2021 |
| Kitashinchi Station     | Osaka     | 9 | 101,577 | April 7, 2020  | January 13, 2021 |
| Tamachi Station         | Okayama   | 9 | 122     | April 16, 2020 |                  |
| Hatchobori Station      | Hiroshima | 9 | 14,148  | April 16, 2020 |                  |
| Kawaramachi Station     | Kagawa    | 9 | 14,223  | April 16, 2020 |                  |
| Hakata Station          | Fukuoka   | 9 | 199,839 | April 7, 2020  | January 13, 2021 |
| Nakasu-kawabata Station | Fukuoka   | 9 | 37,054  | April 7, 2020  | January 13, 2021 |
| Kanko-dori Station      | Nagasaki  | 9 | 2,500   | April 16, 2020 |                  |
| Makishi Station         | Okinawa   | 9 | 7,181   | April 16, 2020 |                  |

\* Source: Ministry of Land, Infrastructure, Transport and Tourism. Number of passengers by station.

[https://nlftp.mlit.go.jp/ksj/gml/datalist/KsjTmplt-S12-v2\\_3.html](https://nlftp.mlit.go.jp/ksj/gml/datalist/KsjTmplt-S12-v2_3.html) (accessed May 16, 2021).

\*\* Source: Hamamatsu City. Statistics: Hamamatsu City in 2017 [Japanese]. 2018.

[https://www.city.hamamatsu.shizuoka.jp/gyousei/library/toukeisyo/004\\_h29-toukeisyo.html](https://www.city.hamamatsu.shizuoka.jp/gyousei/library/toukeisyo/004_h29-toukeisyo.html) (accessed May 17, 2021). The number was calculated by doubling the average number of passengers getting on per day.

**Table S2: P-values for the comparison of human mobility before and during the declaration of a state of emergency using the Wilcoxon signed-rank test, by age groups and time frames, and by the first and second declaration.** The ratios of the rolling seven-day daily average of the total population to a baseline on January 16, 2020, were compared between during the declaration of a state of emergency and during the same period before the declaration.

| Declaration | Time frame   | Area                       | Prefecture | Median ratio (before and during the emergency declaration: B, D) by age group |        |            |        |            |        |            |        |            |        |            |        |  |
|-------------|--------------|----------------------------|------------|-------------------------------------------------------------------------------|--------|------------|--------|------------|--------|------------|--------|------------|--------|------------|--------|--|
|             |              |                            |            | B, D                                                                          | 20s    | B, D       | 30s    | B, D       | 40s    | B, D       | 50s    | B, D       | 60s    | B, D       | ≥ 70s  |  |
| First       | 0:00–7:59 AM |                            |            |                                                                               |        |            |        |            |        |            |        |            |        |            |        |  |
|             |              | Susukino Station           | Hokkaido   | 0.89, 0.33                                                                    | <0.001 | 0.56, 0.27 | <0.001 | 0.63, 0.34 | <0.001 | 0.71, 0.37 | <0.001 | 0.62, 0.36 | <0.001 | 0.72, 0.53 | <0.001 |  |
|             |              | Odori Station              | Hokkaido   | 0.78, 0.46                                                                    | <0.001 | 1.03, 0.73 | <0.001 | 1.04, 0.69 | <0.001 | 1.01, 0.75 | <0.001 | 0.98, 0.67 | <0.001 | 0.89, 0.66 | <0.001 |  |
|             |              | Central Hirosaki Station   | Aomori     | 0.34, 0.05                                                                    | <0.001 | 1.40, 0.92 | <0.001 | 1.35, 0.75 | <0.001 | 1.08, 0.64 | <0.001 | 1.34, 0.91 | <0.001 | 0.88, 0.86 | 0.93   |  |
|             |              | Kotodai-Koen Station       | Miyagi     | 0.90, 0.51                                                                    | <0.001 | 0.70, 0.48 | <0.001 | 0.84, 0.66 | <0.001 | 1.09, 0.73 | <0.001 | 1.11, 0.82 | <0.001 | 0.97, 0.57 | <0.001 |  |
|             |              | Tobu-Utsunomiya station    | Tochigi    | 0.93, 0.54                                                                    | <0.001 | 0.91, 0.66 | <0.001 | 0.97, 0.57 | <0.001 | 1.38, 0.76 | <0.001 | 1.05, 0.84 | <0.001 | 0.70, 0.61 | <0.01  |  |
|             |              | Chuo Maebashi Station      | Gunma      | 1.87, 1.86                                                                    | 0.81   | 0.77, 0.52 | <0.001 | 0.81, 0.56 | <0.001 | 0.88, 0.69 | <0.001 | 0.68, 0.45 | <0.001 | 0.98, 0.65 | <0.001 |  |
|             |              | Shibuya Station            | Tokyo      | 0.85, 0.35                                                                    | <0.001 | 0.78, 0.46 | <0.001 | 0.92, 0.60 | <0.001 | 0.89, 0.64 | <0.001 | 0.88, 0.61 | <0.001 | 0.92, 0.59 | <0.001 |  |
|             |              | Shibuya Center Street      | Tokyo      | 0.77, 0.31                                                                    | <0.001 | 0.73, 0.41 | <0.001 | 0.86, 0.54 | <0.001 | 0.82, 0.57 | <0.001 | 0.82, 0.54 | <0.001 | 0.85, 0.55 | <0.001 |  |
|             |              | Harajuku Station           | Tokyo      | 0.99, 0.50                                                                    | <0.001 | 1.14, 0.58 | <0.001 | 1.16, 0.83 | <0.001 | 1.21, 0.84 | <0.001 | 1.24, 0.88 | <0.001 | 1.43, 1.17 | <0.001 |  |
|             |              | Shinjuku Kabukicho         | Tokyo      | 0.97, 0.30                                                                    | <0.001 | 1.05, 0.55 | <0.001 | 1.01, 0.53 | <0.001 | 0.98, 0.60 | <0.001 | 1.04, 0.64 | <0.001 | 0.93, 0.54 | <0.001 |  |
|             |              | Ikebukuro Station          | Tokyo      | 1.09, 0.50                                                                    | <0.001 | 1.15, 0.72 | <0.001 | 1.12, 0.76 | <0.001 | 1.19, 0.82 | <0.001 | 1.09, 0.75 | <0.001 | 1.09, 0.69 | <0.001 |  |
|             |              | Tokyo Station              | Tokyo      | 0.79, 0.38                                                                    | <0.001 | 1.02, 0.60 | <0.001 | 1.03, 0.60 | <0.001 | 1.01, 0.61 | <0.001 | 0.98, 0.58 | <0.001 | 0.80, 0.45 | <0.001 |  |
|             |              | Shinbashi Station          | Tokyo      | 0.83, 0.37                                                                    | <0.001 | 0.99, 0.48 | <0.001 | 0.97, 0.56 | <0.001 | 0.96, 0.50 | <0.001 | 0.94, 0.53 | <0.001 | 0.95, 0.47 | <0.001 |  |
|             |              | Shinagawa Station          | Tokyo      | 0.78, 0.48                                                                    | <0.001 | 1.00, 0.60 | <0.001 | 0.92, 0.61 | <0.001 | 0.97, 0.61 | <0.001 | 0.93, 0.62 | <0.001 | 0.68, 0.51 | <0.001 |  |
|             |              | Ueno Station               | Tokyo      | 0.99, 0.74                                                                    | <0.001 | 1.07, 0.74 | <0.001 | 1.01, 0.77 | <0.001 | 0.99, 0.78 | <0.001 | 0.92, 0.66 | <0.001 | 0.83, 0.56 | <0.001 |  |
|             |              | Ginza Station              | Tokyo      | 1.04, 0.44                                                                    | <0.001 | 1.08, 0.48 | <0.001 | 1.07, 0.58 | <0.001 | 1.03, 0.55 | <0.001 | 0.95, 0.51 | <0.001 | 0.89, 0.40 | <0.001 |  |
|             |              | Roppongi Station           | Tokyo      | 0.93, 0.28                                                                    | <0.001 | 1.05, 0.49 | <0.001 | 0.97, 0.62 | <0.001 | 0.98, 0.58 | <0.001 | 0.97, 0.59 | <0.001 | 1.00, 0.52 | <0.001 |  |
|             |              | Kichijoji Station          | Tokyo      | 1.08, 0.74                                                                    | <0.001 | 0.92, 0.56 | <0.001 | 1.08, 0.75 | <0.001 | 1.04, 0.72 | <0.001 | 0.99, 0.71 | <0.001 | 1.09, 0.90 | <0.001 |  |
|             |              | Motomachi-Chukagai Station | Kanagawa   | 1.10, 0.69                                                                    | <0.001 | 0.98, 0.80 | <0.001 | 0.96, 0.79 | <0.001 | 0.97, 0.81 | <0.001 | 1.15, 1.01 | <0.05  | 0.80, 0.65 | <0.001 |  |
|             |              | Sakuragicho Station        | Kanagawa   | 0.80, 0.47                                                                    | <0.001 | 0.97, 0.79 | <0.001 | 0.96, 0.85 | <0.001 | 0.99, 0.75 | <0.001 | 0.91, 0.70 | <0.001 | 0.74, 0.61 | <0.001 |  |
|             |              | Kannai Station             | Kanagawa   | 1.71, 0.92                                                                    | <0.001 | 0.96, 0.72 | <0.001 | 1.15, 0.88 | <0.001 | 1.07, 0.84 | <0.001 | 1.01, 0.74 | <0.001 | 1.56, 1.18 | <0.001 |  |
|             |              | Hamamatsu Station          | Shizuoka   | 0.82, 0.31                                                                    | <0.001 | 0.88, 0.61 | <0.001 | 0.78, 0.55 | <0.001 | 0.93, 0.70 | <0.001 | 0.91, 0.71 | <0.001 | 0.92, 0.78 | <0.001 |  |
|             |              | Sakae Station              | Aichi      | 0.69, 0.48                                                                    | <0.001 | 0.93, 0.47 | <0.001 | 0.92, 0.51 | <0.001 | 0.95, 0.50 | <0.001 | 0.91, 0.57 | <0.001 | 0.77, 0.41 | <0.001 |  |

|                         |           |            |        |            |        |            |        |            |        |            |        |            |        |
|-------------------------|-----------|------------|--------|------------|--------|------------|--------|------------|--------|------------|--------|------------|--------|
| Fushimi Station         | Aichi     | 0.93, 0.47 | <0.001 | 1.12, 0.66 | <0.001 | 0.96, 0.66 | <0.001 | 1.11, 0.82 | <0.001 | 0.95, 0.71 | <0.001 | 0.69, 0.42 | <0.001 |
| Kawaramachi Station     | Kyoto     | 1.06, 0.29 | <0.001 | 0.72, 0.39 | <0.001 | 0.88, 0.54 | <0.001 | 1.04, 0.57 | <0.001 | 1.02, 0.51 | <0.001 | 0.95, 0.71 | <0.001 |
| Shinsaibashi Station    | Osaka     | 0.93, 0.32 | <0.001 | 0.81, 0.43 | <0.001 | 0.84, 0.54 | <0.001 | 0.87, 0.53 | <0.001 | 0.92, 0.56 | <0.001 | 0.68, 0.53 | <0.001 |
| Namba Station           | Osaka     | 1.17, 0.35 | <0.001 | 0.85, 0.38 | <0.001 | 0.90, 0.52 | <0.001 | 0.92, 0.52 | <0.001 | 0.85, 0.50 | <0.001 | 0.79, 0.43 | <0.001 |
| Kitashinchi Station     | Osaka     | 0.92, 0.27 | <0.001 | 0.93, 0.33 | <0.001 | 0.93, 0.38 | <0.001 | 1.02, 0.46 | <0.001 | 1.02, 0.43 | <0.001 | 1.01, 0.46 | <0.001 |
| Tamachi Station         | Okayama   | 0.98, 0.68 | <0.001 | 0.77, 0.42 | <0.001 | 1.28, 0.81 | <0.001 | 1.14, 0.70 | <0.001 | 0.93, 0.63 | <0.001 | 0.66, 0.69 | <0.05  |
| Hatchobori Station      | Hiroshima | 0.71, 0.32 | <0.001 | 0.65, 0.37 | <0.001 | 0.79, 0.47 | <0.001 | 0.72, 0.41 | <0.001 | 0.78, 0.45 | <0.001 | 0.99, 0.38 | <0.001 |
| Kawaramachi Station     | Kagawa    | 0.88, 0.47 | <0.001 | 1.32, 0.84 | <0.001 | 1.22, 1.07 | 0.14   | 1.69, 1.63 | 0.60   | 1.51, 1.46 | 0.36   | 1.17, 1.45 | <0.01  |
| Hakata Station          | Fukuoka   | 0.86, 0.35 | <0.001 | 0.86, 0.46 | <0.001 | 1.04, 0.58 | <0.001 | 0.93, 0.51 | <0.001 | 0.87, 0.50 | <0.001 | 0.85, 0.46 | <0.001 |
| Nakasu-kawabata Station | Fukuoka   | 0.83, 0.48 | <0.001 | 0.70, 0.29 | <0.001 | 0.80, 0.39 | <0.001 | 0.94, 0.53 | <0.001 | 0.97, 0.54 | <0.001 | 0.76, 0.40 | <0.001 |
| Kanko-dori Station      | Nagasaki  | 1.33, 0.73 | <0.001 | 1.15, 0.69 | <0.001 | 0.86, 0.58 | <0.001 | 0.89, 0.74 | <0.001 | 1.02, 0.82 | <0.001 | 0.83, 0.61 | <0.001 |
| Makishi Station         | Okinawa   | 1.25, 0.85 | <0.001 | 0.82, 0.60 | <0.001 | 1.24, 1.07 | <0.001 | 0.97, 0.73 | <0.001 | 1.15, 0.91 | <0.001 | 1.29, 0.85 | <0.001 |

08:00-11:59 AM

|                          |          |            |        |            |        |            |        |            |        |            |        |            |        |
|--------------------------|----------|------------|--------|------------|--------|------------|--------|------------|--------|------------|--------|------------|--------|
| Susukino Station         | Hokkaido | 1.05, 0.65 | <0.001 | 0.97, 0.67 | <0.001 | 0.95, 0.70 | <0.001 | 0.96, 0.73 | <0.001 | 0.89, 0.63 | <0.001 | 0.81, 0.60 | <0.001 |
| Odori Station            | Hokkaido | 0.90, 0.51 | <0.001 | 1.06, 0.69 | <0.001 | 0.98, 0.66 | <0.001 | 0.97, 0.64 | <0.001 | 0.91, 0.58 | <0.001 | 0.74, 0.49 | <0.001 |
| Central Hirosaki Station | Aomori   | 0.54, 0.49 | <0.01  | 1.13, 0.84 | <0.001 | 1.18, 0.78 | <0.001 | 1.17, 0.87 | <0.001 | 1.39, 1.12 | <0.001 | 1.00, 0.91 | <0.001 |
| Kotodai-Koen Station     | Miyagi   | 0.82, 0.56 | <0.001 | 1.09, 0.77 | <0.001 | 0.98, 0.69 | <0.001 | 1.03, 0.72 | <0.001 | 1.00, 0.71 | <0.001 | 0.87, 0.62 | <0.001 |
| Tobu-Utsunomiya station  | Tochigi  | 1.11, 0.80 | <0.001 | 1.08, 0.76 | <0.001 | 0.99, 0.64 | <0.001 | 1.15, 0.76 | <0.001 | 0.97, 0.72 | <0.001 | 0.84, 0.51 | <0.001 |
| Chuo Maebashi Station    | Gunma    | 1.70, 1.63 | <0.01  | 0.45, 0.39 | <0.001 | 0.74, 0.62 | <0.001 | 0.96, 0.79 | <0.001 | 0.66, 0.54 | <0.001 | 1.00, 0.81 | <0.001 |
| Shibuya Station          | Tokyo    | 0.75, 0.32 | <0.001 | 0.82, 0.44 | <0.001 | 0.84, 0.50 | <0.001 | 0.88, 0.55 | <0.001 | 0.81, 0.48 | <0.001 | 0.67, 0.38 | <0.001 |
| Shibuya Center Street    | Tokyo    | 0.68, 0.29 | <0.001 | 0.75, 0.41 | <0.001 | 0.78, 0.46 | <0.001 | 0.81, 0.50 | <0.001 | 0.75, 0.44 | <0.001 | 0.61, 0.36 | <0.001 |
| Harajuku Station         | Tokyo    | 0.82, 0.38 | <0.001 | 0.96, 0.57 | <0.001 | 0.92, 0.57 | <0.001 | 0.97, 0.66 | <0.001 | 0.86, 0.60 | <0.001 | 0.80, 0.55 | <0.001 |
| Shinjuku Kabukicho       | Tokyo    | 0.82, 0.40 | <0.001 | 0.88, 0.51 | <0.001 | 0.86, 0.52 | <0.001 | 0.86, 0.53 | <0.001 | 0.82, 0.48 | <0.001 | 0.63, 0.36 | <0.001 |
| Ikebukuro Station        | Tokyo    | 0.96, 0.47 | <0.001 | 1.02, 0.59 | <0.001 | 1.06, 0.65 | <0.001 | 1.08, 0.68 | <0.001 | 1.01, 0.59 | <0.001 | 0.86, 0.45 | <0.001 |
| Tokyo Station            | Tokyo    | 0.88, 0.34 | <0.001 | 0.94, 0.44 | <0.001 | 0.95, 0.45 | <0.001 | 0.92, 0.43 | <0.001 | 0.82, 0.39 | <0.001 | 0.64, 0.30 | <0.001 |
| Shinbashi Station        | Tokyo    | 0.86, 0.39 | <0.001 | 0.85, 0.39 | <0.001 | 0.87, 0.46 | <0.001 | 0.87, 0.44 | <0.001 | 0.84, 0.46 | <0.001 | 0.74, 0.39 | <0.001 |
| Shinagawa Station        | Tokyo    | 0.81, 0.42 | <0.001 | 0.84, 0.40 | <0.001 | 0.79, 0.39 | <0.001 | 0.82, 0.39 | <0.001 | 0.73, 0.39 | <0.001 | 0.60, 0.33 | <0.001 |
| Ueno Station             | Tokyo    | 0.89, 0.48 | <0.001 | 0.87, 0.58 | <0.001 | 0.87, 0.61 | <0.001 | 0.86, 0.61 | <0.001 | 0.75, 0.50 | <0.001 | 0.59, 0.38 | <0.001 |
| Ginza Station            | Tokyo    | 1.04, 0.45 | <0.001 | 0.93, 0.42 | <0.001 | 0.95, 0.48 | <0.001 | 0.90, 0.47 | <0.001 | 0.82, 0.42 | <0.001 | 0.65, 0.31 | <0.001 |
| Roppongi Station         | Tokyo    | 0.88, 0.50 | <0.001 | 0.96, 0.53 | <0.001 | 0.90, 0.60 | <0.001 | 0.99, 0.64 | <0.001 | 0.94, 0.59 | <0.001 | 0.88, 0.46 | <0.001 |
| Kichijoji Station        | Tokyo    | 0.88, 0.54 | <0.001 | 0.95, 0.57 | <0.001 | 0.98, 0.66 | <0.001 | 0.97, 0.67 | <0.001 | 0.91, 0.66 | <0.001 | 0.78, 0.55 | <0.001 |

|                            |           |            |        |            |        |            |        |            |        |            |        |            |        |
|----------------------------|-----------|------------|--------|------------|--------|------------|--------|------------|--------|------------|--------|------------|--------|
| Motomachi-Chukagai Station | Kanagawa  | 0.99, 0.84 | <0.001 | 0.96, 0.75 | <0.001 | 1.02, 0.81 | <0.001 | 1.00, 0.85 | <0.001 | 0.95, 0.81 | <0.001 | 0.82, 0.70 | <0.001 |
| Sakuragicho Station        | Kanagawa  | 1.14, 0.68 | <0.001 | 0.91, 0.66 | <0.001 | 0.94, 0.73 | <0.001 | 0.98, 0.72 | <0.001 | 0.85, 0.65 | <0.001 | 0.77, 0.47 | <0.001 |
| Kannai Station             | Kanagawa  | 1.28, 0.74 | <0.001 | 1.08, 0.69 | <0.001 | 1.02, 0.73 | <0.001 | 1.12, 0.87 | <0.001 | 1.06, 0.80 | <0.001 | 1.06, 0.71 | <0.001 |
| Hamamatsu Station          | Shizuoka  | 1.03, 0.57 | <0.001 | 0.84, 0.59 | <0.001 | 0.90, 0.65 | <0.001 | 0.91, 0.61 | <0.001 | 0.86, 0.59 | <0.001 | 0.77, 0.47 | <0.001 |
| Sakae Station              | Aichi     | 0.89, 0.44 | <0.001 | 0.93, 0.53 | <0.001 | 0.94, 0.58 | <0.001 | 0.99, 0.61 | <0.001 | 0.94, 0.58 | <0.001 | 0.67, 0.43 | <0.001 |
| Fushimi Station            | Aichi     | 0.93, 0.60 | <0.001 | 1.00, 0.56 | <0.001 | 1.04, 0.70 | <0.001 | 1.10, 0.71 | <0.001 | 0.95, 0.60 | <0.001 | 0.64, 0.42 | <0.001 |
| Kawaramachi Station        | Kyoto     | 0.95, 0.44 | <0.001 | 0.93, 0.57 | <0.001 | 0.95, 0.64 | <0.001 | 0.98, 0.65 | <0.001 | 0.84, 0.54 | <0.001 | 0.66, 0.39 | <0.001 |
| Shinsaibashi Station       | Osaka     | 1.03, 0.52 | <0.001 | 0.99, 0.57 | <0.001 | 1.09, 0.69 | <0.001 | 1.10, 0.67 | <0.001 | 1.00, 0.64 | <0.001 | 0.89, 0.59 | <0.001 |
| Namba Station              | Osaka     | 0.88, 0.37 | <0.001 | 0.87, 0.46 | <0.001 | 0.84, 0.48 | <0.001 | 0.87, 0.52 | <0.001 | 0.79, 0.46 | <0.001 | 0.61, 0.34 | <0.001 |
| Kitashinchi Station        | Osaka     | 1.07, 0.53 | <0.001 | 0.95, 0.51 | <0.001 | 1.01, 0.57 | <0.001 | 1.03, 0.60 | <0.001 | 0.95, 0.56 | <0.001 | 0.84, 0.41 | <0.001 |
| Tamachi Station            | Okayama   | 1.14, 0.84 | <0.001 | 1.16, 0.87 | <0.001 | 1.30, 0.95 | <0.001 | 1.15, 0.89 | <0.001 | 1.08, 0.76 | <0.001 | 0.78, 0.69 | <0.01  |
| Hatchobori Station         | Hiroshima | 0.97, 0.55 | <0.001 | 0.96, 0.62 | <0.001 | 1.03, 0.68 | <0.001 | 1.10, 0.67 | <0.001 | 0.94, 0.58 | <0.001 | 0.84, 0.53 | <0.001 |
| Kawaramachi Station        | Kagawa    | 1.04, 0.72 | <0.001 | 1.14, 0.84 | <0.001 | 1.00, 0.77 | <0.001 | 1.16, 0.90 | <0.001 | 0.93, 0.77 | <0.001 | 1.02, 0.89 | <0.001 |
| Hakata Station             | Fukuoka   | 0.90, 0.41 | <0.001 | 0.83, 0.45 | <0.001 | 0.85, 0.50 | <0.001 | 0.86, 0.47 | <0.001 | 0.86, 0.46 | <0.001 | 0.69, 0.36 | <0.001 |
| Nakasu-kawabata Station    | Fukuoka   | 0.99, 0.63 | <0.001 | 1.05, 0.61 | <0.001 | 1.10, 0.66 | <0.001 | 1.25, 0.74 | <0.001 | 1.19, 0.63 | <0.001 | 0.85, 0.55 | <0.001 |
| Kanko-dori Station         | Nagasaki  | 1.22, 0.84 | <0.001 | 0.98, 0.71 | <0.001 | 0.98, 0.78 | <0.001 | 0.97, 0.81 | <0.001 | 0.93, 0.77 | <0.001 | 0.95, 0.78 | <0.001 |
| Makishi Station            | Okinawa   | 1.61, 1.11 | <0.001 | 1.15, 0.89 | <0.001 | 1.21, 0.93 | <0.001 | 1.05, 0.84 | <0.001 | 1.06, 0.95 | <0.001 | 0.90, 0.69 | <0.001 |

12:00-15:59 PM

|                          |          |            |        |            |        |            |        |            |        |            |        |            |        |
|--------------------------|----------|------------|--------|------------|--------|------------|--------|------------|--------|------------|--------|------------|--------|
| Susukino Station         | Hokkaido | 1.10, 0.62 | <0.001 | 0.91, 0.66 | <0.001 | 0.92, 0.74 | <0.001 | 0.94, 0.76 | <0.001 | 0.86, 0.68 | <0.001 | 0.69, 0.44 | <0.001 |
| Odori Station            | Hokkaido | 0.93, 0.55 | <0.001 | 1.04, 0.73 | <0.001 | 0.94, 0.67 | <0.001 | 0.94, 0.64 | <0.001 | 0.87, 0.57 | <0.001 | 0.60, 0.37 | <0.001 |
| Central Hirosaki Station | Aomori   | 1.15, 1.07 | <0.01  | 0.99, 0.82 | <0.001 | 1.25, 0.87 | <0.001 | 1.21, 0.93 | <0.001 | 1.15, 0.93 | <0.001 | 1.01, 0.92 | <0.01  |
| Kotodai-Koen Station     | Miyagi   | 0.98, 0.64 | <0.001 | 1.02, 0.72 | <0.001 | 1.01, 0.72 | <0.001 | 1.04, 0.76 | <0.001 | 0.93, 0.68 | <0.001 | 0.63, 0.42 | <0.001 |
| Tobu-Utsunomiya station  | Tochigi  | 1.51, 1.18 | <0.001 | 0.81, 0.58 | <0.001 | 0.87, 0.55 | <0.001 | 1.08, 0.71 | <0.001 | 0.82, 0.60 | <0.001 | 0.70, 0.34 | <0.001 |
| Chuo Maebashi Station    | Gunma    | 1.81, 1.79 | 0.68   | 0.47, 0.46 | 0.40   | 0.61, 0.57 | <0.01  | 0.89, 0.80 | <0.05  | 0.79, 0.77 | 0.50   | 0.92, 0.67 | <0.001 |
| Shibuya Station          | Tokyo    | 0.75, 0.26 | <0.001 | 0.79, 0.41 | <0.001 | 0.77, 0.46 | <0.001 | 0.80, 0.49 | <0.001 | 0.69, 0.42 | <0.001 | 0.53, 0.29 | <0.001 |
| Shibuya Center Street    | Tokyo    | 0.70, 0.24 | <0.001 | 0.72, 0.38 | <0.001 | 0.70, 0.43 | <0.001 | 0.73, 0.45 | <0.001 | 0.61, 0.37 | <0.001 | 0.47, 0.27 | <0.001 |
| Harajuku Station         | Tokyo    | 0.85, 0.38 | <0.001 | 0.75, 0.52 | <0.001 | 0.70, 0.51 | <0.001 | 0.76, 0.60 | <0.001 | 0.68, 0.54 | <0.001 | 0.56, 0.47 | <0.001 |
| Shinjuku Kabukicho       | Tokyo    | 0.81, 0.30 | <0.001 | 0.81, 0.45 | <0.001 | 0.77, 0.45 | <0.001 | 0.78, 0.46 | <0.001 | 0.69, 0.38 | <0.001 | 0.52, 0.27 | <0.001 |
| Ikebukuro Station        | Tokyo    | 1.03, 0.39 | <0.001 | 0.95, 0.49 | <0.001 | 0.97, 0.54 | <0.001 | 1.00, 0.58 | <0.001 | 0.92, 0.49 | <0.001 | 0.75, 0.34 | <0.001 |
| Tokyo Station            | Tokyo    | 0.99, 0.32 | <0.001 | 0.94, 0.41 | <0.001 | 0.97, 0.42 | <0.001 | 0.96, 0.42 | <0.001 | 0.77, 0.36 | <0.001 | 0.59, 0.22 | <0.001 |
| Shinbashi Station        | Tokyo    | 0.90, 0.35 | <0.001 | 0.82, 0.36 | <0.001 | 0.84, 0.42 | <0.001 | 0.86, 0.40 | <0.001 | 0.80, 0.41 | <0.001 | 0.67, 0.30 | <0.001 |

|                            |           |            |        |            |        |            |        |            |        |            |        |            |        |
|----------------------------|-----------|------------|--------|------------|--------|------------|--------|------------|--------|------------|--------|------------|--------|
| Shinagawa Station          | Tokyo     | 0.87, 0.43 | <0.001 | 0.83, 0.41 | <0.001 | 0.82, 0.41 | <0.001 | 0.85, 0.40 | <0.001 | 0.70, 0.38 | <0.001 | 0.56, 0.29 | <0.001 |
| Ueno Station               | Tokyo     | 0.85, 0.42 | <0.001 | 0.88, 0.60 | <0.001 | 0.84, 0.58 | <0.001 | 0.84, 0.59 | <0.001 | 0.67, 0.46 | <0.001 | 0.52, 0.32 | <0.001 |
| Ginza Station              | Tokyo     | 0.97, 0.27 | <0.001 | 0.91, 0.32 | <0.001 | 0.92, 0.39 | <0.001 | 0.87, 0.36 | <0.001 | 0.71, 0.28 | <0.001 | 0.58, 0.21 | <0.001 |
| Roppongi Station           | Tokyo     | 0.83, 0.46 | <0.001 | 0.95, 0.52 | <0.001 | 0.93, 0.58 | <0.001 | 0.93, 0.57 | <0.001 | 0.83, 0.51 | <0.001 | 0.81, 0.44 | <0.001 |
| Kichijoji Station          | Tokyo     | 0.91, 0.49 | <0.001 | 0.89, 0.53 | <0.001 | 0.86, 0.56 | <0.001 | 0.87, 0.61 | <0.001 | 0.85, 0.59 | <0.001 | 0.74, 0.43 | <0.001 |
| Motomachi-Chukagai Station | Kanagawa  | 0.97, 0.85 | <0.001 | 0.85, 0.72 | <0.001 | 1.04, 0.94 | <0.001 | 0.96, 0.88 | <0.001 | 0.85, 0.78 | <0.001 | 0.80, 0.68 | <0.001 |
| Sakuragicho Station        | Kanagawa  | 1.05, 0.56 | <0.001 | 0.88, 0.64 | <0.001 | 0.85, 0.70 | <0.001 | 0.87, 0.69 | <0.001 | 0.77, 0.55 | <0.001 | 0.63, 0.39 | <0.001 |
| Kannai Station             | Kanagawa  | 1.22, 0.86 | <0.001 | 1.05, 0.70 | <0.001 | 0.98, 0.70 | <0.001 | 1.07, 0.86 | <0.001 | 1.07, 0.80 | <0.001 | 0.89, 0.59 | <0.001 |
| Hamamatsu Station          | Shizuoka  | 1.00, 0.50 | <0.001 | 0.76, 0.53 | <0.001 | 0.85, 0.61 | <0.001 | 0.82, 0.59 | <0.001 | 0.79, 0.54 | <0.001 | 0.58, 0.43 | <0.001 |
| Sakae Station              | Aichi     | 0.92, 0.43 | <0.001 | 0.88, 0.55 | <0.001 | 0.93, 0.61 | <0.001 | 1.00, 0.67 | <0.001 | 0.78, 0.52 | <0.001 | 0.55, 0.37 | <0.001 |
| Fushimi Station            | Aichi     | 0.99, 0.62 | <0.001 | 0.96, 0.57 | <0.001 | 1.05, 0.74 | <0.001 | 1.06, 0.72 | <0.001 | 0.81, 0.56 | <0.001 | 0.66, 0.41 | <0.001 |
| Kawaramachi Station        | Kyoto     | 0.92, 0.35 | <0.001 | 0.80, 0.47 | <0.001 | 0.81, 0.50 | <0.001 | 0.82, 0.53 | <0.001 | 0.72, 0.39 | <0.001 | 0.52, 0.34 | <0.001 |
| Shinsaibashi Station       | Osaka     | 0.96, 0.43 | <0.001 | 0.95, 0.52 | <0.001 | 1.03, 0.65 | <0.001 | 0.98, 0.61 | <0.001 | 0.86, 0.55 | <0.001 | 0.71, 0.43 | <0.001 |
| Namba Station              | Osaka     | 0.86, 0.30 | <0.001 | 0.75, 0.37 | <0.001 | 0.71, 0.38 | <0.001 | 0.71, 0.38 | <0.001 | 0.63, 0.32 | <0.001 | 0.54, 0.27 | <0.001 |
| Kitashinchi Station        | Osaka     | 1.13, 0.45 | <0.001 | 0.95, 0.52 | <0.001 | 0.94, 0.54 | <0.001 | 0.97, 0.56 | <0.001 | 0.88, 0.49 | <0.001 | 0.70, 0.33 | <0.001 |
| Tamachi Station            | Okayama   | 1.02, 0.81 | <0.001 | 1.19, 0.93 | <0.001 | 1.18, 0.91 | <0.001 | 1.12, 0.87 | <0.001 | 1.05, 0.73 | <0.001 | 0.68, 0.56 | <0.001 |
| Hatchobori Station         | Hiroshima | 0.92, 0.51 | <0.001 | 0.82, 0.55 | <0.001 | 0.89, 0.63 | <0.001 | 0.92, 0.64 | <0.001 | 0.79, 0.52 | <0.001 | 0.70, 0.43 | <0.001 |
| Kawaramachi Station        | Kagawa    | 0.84, 0.59 | <0.001 | 1.05, 0.75 | <0.001 | 1.01, 0.88 | <0.01  | 1.05, 0.94 | <0.01  | 0.84, 0.84 | 0.46   | 0.79, 0.72 | <0.05  |
| Hakata Station             | Fukuoka   | 0.90, 0.36 | <0.001 | 0.82, 0.37 | <0.001 | 0.81, 0.45 | <0.001 | 0.79, 0.38 | <0.001 | 0.77, 0.38 | <0.001 | 0.63, 0.29 | <0.001 |
| Nakasu-kawabata Station    | Fukuoka   | 0.94, 0.58 | <0.001 | 0.94, 0.63 | <0.001 | 1.09, 0.73 | <0.001 | 1.22, 0.78 | <0.001 | 1.11, 0.62 | <0.001 | 0.76, 0.43 | <0.001 |
| Kanko-dori Station         | Nagasaki  | 0.96, 0.71 | <0.001 | 0.87, 0.67 | <0.001 | 0.89, 0.72 | <0.001 | 0.91, 0.75 | <0.001 | 0.84, 0.68 | <0.001 | 0.84, 0.61 | <0.001 |
| Makishi Station            | Okinawa   | 1.29, 1.04 | <0.001 | 1.18, 0.91 | <0.001 | 1.11, 0.87 | <0.001 | 1.06, 0.94 | <0.001 | 0.99, 0.91 | <0.001 | 1.03, 0.85 | <0.001 |

16:00–19:59 PM

|                          |          |            |        |            |        |            |        |            |        |            |        |            |        |
|--------------------------|----------|------------|--------|------------|--------|------------|--------|------------|--------|------------|--------|------------|--------|
| Susukino Station         | Hokkaido | 0.95, 0.47 | <0.001 | 0.77, 0.49 | <0.001 | 0.79, 0.55 | <0.001 | 0.82, 0.54 | <0.001 | 0.72, 0.44 | <0.001 | 0.54, 0.35 | <0.001 |
| Odori Station            | Hokkaido | 0.90, 0.53 | <0.001 | 1.01, 0.64 | <0.001 | 0.93, 0.61 | <0.001 | 0.94, 0.57 | <0.001 | 0.86, 0.50 | <0.001 | 0.63, 0.41 | <0.001 |
| Central Hirosaki Station | Aomori   | 0.78, 0.48 | <0.001 | 1.13, 0.81 | <0.001 | 1.15, 0.73 | <0.001 | 1.02, 0.75 | <0.001 | 1.41, 1.06 | <0.001 | 0.93, 0.94 | 0.79   |
| Kotodai-Koen Station     | Miyagi   | 0.93, 0.60 | <0.001 | 0.99, 0.67 | <0.001 | 0.96, 0.66 | <0.001 | 0.99, 0.71 | <0.001 | 0.82, 0.59 | <0.001 | 0.72, 0.43 | <0.001 |
| Tobu-Utsunomiya station  | Tochigi  | 1.20, 0.84 | <0.001 | 0.94, 0.61 | <0.001 | 0.97, 0.52 | <0.001 | 1.25, 0.68 | <0.001 | 0.93, 0.63 | <0.001 | 0.85, 0.49 | <0.001 |
| Chuo Maebashi Station    | Gunma    | 1.61, 1.39 | 0.10   | 0.50, 0.34 | <0.001 | 0.68, 0.51 | <0.001 | 0.87, 0.62 | <0.001 | 0.62, 0.48 | <0.001 | 1.21, 0.92 | <0.001 |
| Shibuya Station          | Tokyo    | 0.80, 0.24 | <0.001 | 0.81, 0.42 | <0.001 | 0.81, 0.46 | <0.001 | 0.85, 0.52 | <0.001 | 0.78, 0.45 | <0.001 | 0.58, 0.32 | <0.001 |
| Shibuya Center Street    | Tokyo    | 0.74, 0.22 | <0.001 | 0.73, 0.38 | <0.001 | 0.74, 0.42 | <0.001 | 0.77, 0.48 | <0.001 | 0.69, 0.40 | <0.001 | 0.51, 0.29 | <0.001 |

|                            |           |            |        |            |        |            |        |            |        |            |        |            |        |
|----------------------------|-----------|------------|--------|------------|--------|------------|--------|------------|--------|------------|--------|------------|--------|
| Harajuku Station           | Tokyo     | 0.89, 0.34 | <0.001 | 0.96, 0.58 | <0.001 | 0.90, 0.60 | <0.001 | 0.89, 0.68 | <0.001 | 0.93, 0.65 | <0.001 | 0.74, 0.47 | <0.001 |
| Shinjuku Kabukicho         | Tokyo     | 0.83, 0.27 | <0.001 | 0.86, 0.42 | <0.001 | 0.85, 0.45 | <0.001 | 0.86, 0.48 | <0.001 | 0.77, 0.42 | <0.001 | 0.55, 0.25 | <0.001 |
| Ikebukuro Station          | Tokyo     | 1.08, 0.44 | <0.001 | 1.05, 0.53 | <0.001 | 1.06, 0.59 | <0.001 | 1.07, 0.63 | <0.001 | 1.02, 0.55 | <0.001 | 0.82, 0.38 | <0.001 |
| Tokyo Station              | Tokyo     | 0.92, 0.30 | <0.001 | 0.92, 0.40 | <0.001 | 0.91, 0.43 | <0.001 | 0.93, 0.44 | <0.001 | 0.83, 0.38 | <0.001 | 0.62, 0.22 | <0.001 |
| Shinbashi Station          | Tokyo     | 0.91, 0.34 | <0.001 | 0.89, 0.37 | <0.001 | 0.88, 0.43 | <0.001 | 0.89, 0.43 | <0.001 | 0.84, 0.41 | <0.001 | 0.62, 0.24 | <0.001 |
| Shinagawa Station          | Tokyo     | 0.83, 0.42 | <0.001 | 0.82, 0.38 | <0.001 | 0.83, 0.42 | <0.001 | 0.84, 0.42 | <0.001 | 0.78, 0.41 | <0.001 | 0.59, 0.33 | <0.001 |
| Ueno Station               | Tokyo     | 0.81, 0.43 | <0.001 | 0.87, 0.57 | <0.001 | 0.88, 0.61 | <0.001 | 0.90, 0.62 | <0.001 | 0.81, 0.51 | <0.001 | 0.60, 0.32 | <0.001 |
| Ginza Station              | Tokyo     | 0.93, 0.27 | <0.001 | 0.96, 0.31 | <0.001 | 0.94, 0.37 | <0.001 | 0.88, 0.36 | <0.001 | 0.78, 0.29 | <0.001 | 0.57, 0.20 | <0.001 |
| Roppongi Station           | Tokyo     | 0.97, 0.44 | <0.001 | 1.02, 0.50 | <0.001 | 0.95, 0.57 | <0.001 | 0.99, 0.58 | <0.001 | 0.95, 0.53 | <0.001 | 0.70, 0.37 | <0.001 |
| Kichijoji Station          | Tokyo     | 0.97, 0.46 | <0.001 | 0.98, 0.58 | <0.001 | 0.91, 0.60 | <0.001 | 0.92, 0.65 | <0.001 | 0.89, 0.59 | <0.001 | 0.69, 0.43 | <0.001 |
| Motomachi-Chukagai Station | Kanagawa  | 1.04, 0.89 | <0.001 | 0.92, 0.74 | <0.001 | 1.00, 0.83 | <0.001 | 0.97, 0.83 | <0.001 | 0.92, 0.79 | <0.001 | 0.80, 0.66 | <0.001 |
| Sakuragicho Station        | Kanagawa  | 0.97, 0.50 | <0.001 | 0.90, 0.62 | <0.001 | 0.88, 0.68 | <0.001 | 0.90, 0.67 | <0.001 | 0.81, 0.59 | <0.001 | 0.64, 0.39 | <0.001 |
| Kannai Station             | Kanagawa  | 1.22, 0.81 | <0.001 | 1.06, 0.74 | <0.001 | 1.05, 0.76 | <0.001 | 1.13, 0.88 | <0.001 | 1.09, 0.78 | <0.001 | 0.85, 0.51 | <0.001 |
| Hamamatsu Station          | Shizuoka  | 0.94, 0.46 | <0.001 | 0.85, 0.60 | <0.001 | 0.89, 0.64 | <0.001 | 0.88, 0.61 | <0.001 | 0.80, 0.57 | <0.001 | 0.72, 0.52 | <0.001 |
| Sakae Station              | Aichi     | 0.83, 0.38 | <0.001 | 0.91, 0.56 | <0.001 | 0.89, 0.55 | <0.001 | 0.96, 0.58 | <0.001 | 0.88, 0.48 | <0.001 | 0.62, 0.35 | <0.001 |
| Fushimi Station            | Aichi     | 1.01, 0.60 | <0.001 | 1.02, 0.58 | <0.001 | 1.10, 0.70 | <0.001 | 1.06, 0.69 | <0.001 | 0.89, 0.54 | <0.001 | 0.63, 0.31 | <0.001 |
| Kawaramachi Station        | Kyoto     | 0.82, 0.29 | <0.001 | 0.77, 0.44 | <0.001 | 0.91, 0.51 | <0.001 | 0.90, 0.51 | <0.001 | 0.78, 0.40 | <0.001 | 0.62, 0.30 | <0.001 |
| Shinsaibashi Station       | Osaka     | 0.95, 0.43 | <0.001 | 0.97, 0.49 | <0.001 | 1.04, 0.61 | <0.001 | 1.04, 0.62 | <0.001 | 0.95, 0.56 | <0.001 | 0.71, 0.37 | <0.001 |
| Namba Station              | Osaka     | 0.88, 0.27 | <0.001 | 0.85, 0.40 | <0.001 | 0.80, 0.43 | <0.001 | 0.82, 0.44 | <0.001 | 0.71, 0.37 | <0.001 | 0.58, 0.25 | <0.001 |
| Kitashinchi Station        | Osaka     | 1.07, 0.38 | <0.001 | 0.94, 0.46 | <0.001 | 0.98, 0.50 | <0.001 | 1.02, 0.52 | <0.001 | 0.91, 0.44 | <0.001 | 0.75, 0.30 | <0.001 |
| Tamachi Station            | Okayama   | 0.98, 0.70 | <0.001 | 1.15, 0.80 | <0.001 | 1.19, 0.82 | <0.001 | 1.11, 0.79 | <0.001 | 1.02, 0.71 | <0.001 | 0.71, 0.56 | <0.001 |
| Hatchobori Station         | Hiroshima | 0.81, 0.39 | <0.001 | 0.77, 0.44 | <0.001 | 0.86, 0.52 | <0.001 | 0.89, 0.52 | <0.001 | 0.78, 0.45 | <0.001 | 0.64, 0.33 | <0.001 |
| Kawaramachi Station        | Kagawa    | 1.16, 0.61 | <0.001 | 1.05, 0.71 | <0.001 | 1.05, 0.80 | <0.001 | 1.04, 0.94 | <0.001 | 0.86, 0.76 | <0.01  | 0.87, 0.71 | <0.001 |
| Hakata Station             | Fukuoka   | 0.86, 0.31 | <0.001 | 0.87, 0.38 | <0.001 | 0.86, 0.42 | <0.001 | 0.86, 0.41 | <0.001 | 0.85, 0.42 | <0.001 | 0.66, 0.27 | <0.001 |
| Nakasu-kawabata Station    | Fukuoka   | 0.89, 0.50 | <0.001 | 0.99, 0.59 | <0.001 | 1.01, 0.57 | <0.001 | 1.12, 0.61 | <0.001 | 0.91, 0.50 | <0.001 | 0.71, 0.42 | <0.001 |
| Kanko-dori Station         | Nagasaki  | 0.94, 0.59 | <0.001 | 0.91, 0.67 | <0.001 | 0.93, 0.72 | <0.001 | 0.95, 0.75 | <0.001 | 0.85, 0.66 | <0.001 | 0.78, 0.52 | <0.001 |
| Makishi Station            | Okinawa   | 1.62, 1.17 | <0.001 | 1.13, 0.84 | <0.001 | 1.17, 0.89 | <0.001 | 0.99, 0.85 | <0.001 | 1.07, 0.92 | <0.001 | 1.12, 0.80 | <0.001 |

20:00-23:59 PM

|                          |          |            |        |            |        |            |        |            |        |            |        |            |        |
|--------------------------|----------|------------|--------|------------|--------|------------|--------|------------|--------|------------|--------|------------|--------|
| Susukino Station         | Hokkaido | 0.84, 0.27 | <0.001 | 0.56, 0.22 | <0.001 | 0.57, 0.25 | <0.001 | 0.56, 0.24 | <0.001 | 0.46, 0.17 | <0.001 | 0.43, 0.22 | <0.001 |
| Odori Station            | Hokkaido | 0.80, 0.36 | <0.001 | 0.86, 0.50 | <0.001 | 0.82, 0.47 | <0.001 | 0.81, 0.43 | <0.001 | 0.62, 0.32 | <0.001 | 0.56, 0.35 | <0.001 |
| Central Hirosaki Station | Aomori   | 0.55, 0.15 | <0.001 | 1.17, 0.60 | <0.001 | 0.98, 0.47 | <0.001 | 0.83, 0.46 | <0.001 | 0.79, 0.46 | <0.001 | 0.78, 0.72 | <0.001 |

|                            |           |            |        |            |        |            |        |            |        |            |        |            |        |
|----------------------------|-----------|------------|--------|------------|--------|------------|--------|------------|--------|------------|--------|------------|--------|
| Kotodai-Koen Station       | Miyagi    | 0.77, 0.37 | <0.001 | 0.76, 0.45 | <0.001 | 0.92, 0.59 | <0.001 | 0.92, 0.55 | <0.001 | 0.68, 0.37 | <0.001 | 0.91, 0.45 | <0.001 |
| Tobu-Utsunomiya station    | Tochigi   | 1.24, 0.67 | <0.001 | 1.02, 0.46 | <0.001 | 0.96, 0.41 | <0.001 | 1.25, 0.55 | <0.001 | 0.87, 0.52 | <0.001 | 0.87, 0.47 | <0.001 |
| Chuo Maebashi Station      | Gunma     | 1.14, 1.27 | <0.05  | 0.64, 0.37 | <0.001 | 0.68, 0.42 | <0.001 | 0.87, 0.48 | <0.001 | 0.65, 0.39 | <0.001 | 1.19, 0.64 | <0.001 |
| Shibuya Station            | Tokyo     | 0.71, 0.16 | <0.001 | 0.79, 0.33 | <0.001 | 0.78, 0.35 | <0.001 | 0.78, 0.36 | <0.001 | 0.65, 0.27 | <0.001 | 0.56, 0.24 | <0.001 |
| Shibuya Center Street      | Tokyo     | 0.65, 0.15 | <0.001 | 0.71, 0.28 | <0.001 | 0.71, 0.31 | <0.001 | 0.71, 0.32 | <0.001 | 0.59, 0.24 | <0.001 | 0.50, 0.22 | <0.001 |
| Harajuku Station           | Tokyo     | 0.81, 0.24 | <0.001 | 0.93, 0.41 | <0.001 | 0.92, 0.50 | <0.001 | 0.86, 0.45 | <0.001 | 0.87, 0.41 | <0.001 | 0.79, 0.35 | <0.001 |
| Shinjuku Kabukicho         | Tokyo     | 0.86, 0.16 | <0.001 | 0.85, 0.30 | <0.001 | 0.84, 0.33 | <0.001 | 0.82, 0.34 | <0.001 | 0.74, 0.27 | <0.001 | 0.64, 0.24 | <0.001 |
| Ikebukuro Station          | Tokyo     | 1.02, 0.28 | <0.001 | 1.01, 0.42 | <0.001 | 0.98, 0.45 | <0.001 | 0.98, 0.44 | <0.001 | 0.87, 0.34 | <0.001 | 0.66, 0.25 | <0.001 |
| Tokyo Station              | Tokyo     | 0.79, 0.23 | <0.001 | 0.90, 0.34 | <0.001 | 0.90, 0.37 | <0.001 | 0.86, 0.34 | <0.001 | 0.71, 0.25 | <0.001 | 0.57, 0.17 | <0.001 |
| Shinbashi Station          | Tokyo     | 0.86, 0.22 | <0.001 | 0.83, 0.26 | <0.001 | 0.86, 0.32 | <0.001 | 0.83, 0.28 | <0.001 | 0.71, 0.22 | <0.001 | 0.60, 0.16 | <0.001 |
| Shinagawa Station          | Tokyo     | 0.77, 0.26 | <0.001 | 0.77, 0.30 | <0.001 | 0.81, 0.35 | <0.001 | 0.78, 0.32 | <0.001 | 0.64, 0.29 | <0.001 | 0.53, 0.23 | <0.001 |
| Ueno Station               | Tokyo     | 0.74, 0.37 | <0.001 | 0.81, 0.41 | <0.001 | 0.84, 0.45 | <0.001 | 0.81, 0.43 | <0.001 | 0.68, 0.28 | <0.001 | 0.58, 0.27 | <0.001 |
| Ginza Station              | Tokyo     | 0.92, 0.20 | <0.001 | 0.85, 0.22 | <0.001 | 0.76, 0.27 | <0.001 | 0.78, 0.24 | <0.001 | 0.63, 0.17 | <0.001 | 0.53, 0.12 | <0.001 |
| Roppongi Station           | Tokyo     | 0.94, 0.32 | <0.001 | 0.98, 0.37 | <0.001 | 0.88, 0.44 | <0.001 | 0.90, 0.41 | <0.001 | 0.85, 0.34 | <0.001 | 0.71, 0.27 | <0.001 |
| Kichijoji Station          | Tokyo     | 0.88, 0.32 | <0.001 | 0.91, 0.39 | <0.001 | 0.89, 0.48 | <0.001 | 0.84, 0.43 | <0.001 | 0.78, 0.39 | <0.001 | 0.65, 0.39 | <0.001 |
| Motomachi-Chukagai Station | Kanagawa  | 0.95, 0.62 | <0.001 | 0.95, 0.67 | <0.001 | 0.91, 0.61 | <0.001 | 0.91, 0.66 | <0.001 | 1.00, 0.75 | <0.001 | 0.78, 0.62 | <0.001 |
| Sakuragicho Station        | Kanagawa  | 0.89, 0.39 | <0.001 | 0.91, 0.48 | <0.001 | 0.91, 0.54 | <0.001 | 0.85, 0.45 | <0.001 | 0.73, 0.40 | <0.001 | 0.51, 0.28 | <0.001 |
| Kannai Station             | Kanagawa  | 1.20, 0.54 | <0.001 | 1.02, 0.63 | <0.001 | 1.17, 0.59 | <0.001 | 1.00, 0.59 | <0.001 | 0.91, 0.43 | <0.001 | 0.78, 0.36 | <0.001 |
| Hamamatsu Station          | Shizuoka  | 0.66, 0.28 | <0.001 | 0.86, 0.52 | <0.001 | 0.83, 0.50 | <0.001 | 0.83, 0.43 | <0.001 | 0.68, 0.44 | <0.001 | 0.93, 0.65 | <0.001 |
| Sakae Station              | Aichi     | 0.66, 0.24 | <0.001 | 0.85, 0.32 | <0.001 | 0.82, 0.38 | <0.001 | 0.83, 0.36 | <0.001 | 0.71, 0.32 | <0.001 | 0.48, 0.20 | <0.001 |
| Fushimi Station            | Aichi     | 0.85, 0.38 | <0.001 | 0.87, 0.44 | <0.001 | 0.89, 0.47 | <0.001 | 0.85, 0.50 | <0.001 | 0.80, 0.39 | <0.001 | 0.54, 0.19 | <0.001 |
| Kawaramachi Station        | Kyoto     | 0.92, 0.20 | <0.001 | 0.67, 0.31 | <0.001 | 0.76, 0.35 | <0.001 | 0.87, 0.38 | <0.001 | 0.77, 0.29 | <0.001 | 0.68, 0.21 | <0.001 |
| Shinsaibashi Station       | Osaka     | 0.99, 0.33 | <0.001 | 0.90, 0.34 | <0.001 | 0.87, 0.39 | <0.001 | 0.87, 0.37 | <0.001 | 0.74, 0.30 | <0.001 | 0.63, 0.29 | <0.001 |
| Namba Station              | Osaka     | 0.84, 0.17 | <0.001 | 0.86, 0.27 | <0.001 | 0.83, 0.30 | <0.001 | 0.80, 0.28 | <0.001 | 0.65, 0.24 | <0.001 | 0.61, 0.16 | <0.001 |
| Kitashinchi Station        | Osaka     | 0.99, 0.20 | <0.001 | 0.90, 0.24 | <0.001 | 0.93, 0.27 | <0.001 | 0.90, 0.26 | <0.001 | 0.79, 0.20 | <0.001 | 0.63, 0.16 | <0.001 |
| Tamachi Station            | Okayama   | 0.91, 0.52 | <0.001 | 0.98, 0.50 | <0.001 | 1.01, 0.59 | <0.001 | 0.88, 0.51 | <0.001 | 0.80, 0.46 | <0.001 | 0.70, 0.52 | <0.001 |
| Hatchobori Station         | Hiroshima | 0.71, 0.25 | <0.001 | 0.60, 0.24 | <0.001 | 0.74, 0.27 | <0.001 | 0.72, 0.27 | <0.001 | 0.66, 0.22 | <0.001 | 0.54, 0.18 | <0.001 |
| Kawaramachi Station        | Kagawa    | 1.02, 0.36 | <0.001 | 1.35, 0.68 | <0.001 | 1.20, 0.80 | <0.001 | 1.21, 0.87 | <0.001 | 0.91, 0.69 | <0.01  | 1.05, 0.86 | <0.001 |
| Hakata Station             | Fukuoka   | 0.79, 0.18 | <0.001 | 0.81, 0.25 | <0.001 | 0.83, 0.30 | <0.001 | 0.71, 0.24 | <0.001 | 0.67, 0.27 | <0.001 | 0.52, 0.22 | <0.001 |
| Nakasu-kawabata Station    | Fukuoka   | 0.75, 0.33 | <0.001 | 0.74, 0.27 | <0.001 | 0.74, 0.29 | <0.001 | 0.77, 0.30 | <0.001 | 0.69, 0.26 | <0.001 | 0.69, 0.31 | <0.001 |
| Kanko-dori Station         | Nagasaki  | 0.98, 0.46 | <0.001 | 0.86, 0.39 | <0.001 | 0.81, 0.47 | <0.001 | 0.86, 0.52 | <0.001 | 0.72, 0.50 | <0.001 | 0.62, 0.26 | <0.001 |



|        | Makishi Station            | Okinawa  | 1.54, 0.96 | <0.001 | 0.88, 0.62 | <0.001 | 1.10, 0.87 | <0.001 | 1.01, 0.69 | <0.001 | 1.12, 0.78 | <0.001 | 1.13, 0.71 | <0.001 |
|--------|----------------------------|----------|------------|--------|------------|--------|------------|--------|------------|--------|------------|--------|------------|--------|
| Second |                            |          |            |        |            |        |            |        |            |        |            |        |            |        |
|        | 0:00–7:59 AM               |          |            |        |            |        |            |        |            |        |            |        |            |        |
|        | Susukino Station           | Hokkaido | –          | –      | –          | –      | –          | –      | –          | –      | –          | –      | –          | –      |
|        | Odori Station              | Hokkaido | –          | –      | –          | –      | –          | –      | –          | –      | –          | –      | –          | –      |
|        | Central Hirosaki Station   | Aomori   | –          | –      | –          | –      | –          | –      | –          | –      | –          | –      | –          | –      |
|        | Kotodai-Koen Station       | Miyagi   | –          | –      | –          | –      | –          | –      | –          | –      | –          | –      | –          | –      |
|        | Tobu-Utsunomiya station    | Tochigi  | 0.37, 0.25 | <0.001 | 0.42, 0.39 | <0.05  | 0.53, 0.57 | 0.80   | 0.69, 0.61 | <0.05  | 0.55, 0.56 | 0.96   | 0.48, 0.40 | <0.001 |
|        | Chuo Maebashi Station      | Gunma    | –          | –      | –          | –      | –          | –      | –          | –      | –          | –      | –          | –      |
|        | Shibuya Station            | Tokyo    | 0.66, 0.44 | <0.001 | 0.31, 0.29 | <0.001 | 0.37, 0.36 | 0.05   | 0.38, 0.36 | <0.01  | 0.36, 0.38 | <0.001 | 0.55, 0.52 | <0.001 |
|        | Shibuya Center Street      | Tokyo    | 0.63, 0.41 | <0.001 | 0.29, 0.26 | <0.001 | 0.34, 0.32 | <0.001 | 0.34, 0.32 | <0.001 | 0.32, 0.34 | <0.05  | 0.51, 0.47 | <0.001 |
|        | Harajuku Station           | Tokyo    | 0.78, 0.63 | <0.001 | 0.47, 0.44 | <0.001 | 0.55, 0.55 | 0.05   | 0.51, 0.48 | <0.01  | 0.47, 0.48 | <0.01  | 0.84, 0.79 | 0.89   |
|        | Shinjuku Kabukicho         | Tokyo    | 0.62, 0.47 | <0.001 | 0.45, 0.39 | <0.001 | 0.44, 0.40 | <0.001 | 0.47, 0.46 | <0.001 | 0.41, 0.41 | 0.94   | 0.63, 0.56 | <0.001 |
|        | Ikebukuro Station          | Tokyo    | 0.67, 0.53 | <0.001 | 0.45, 0.40 | <0.001 | 0.48, 0.44 | <0.001 | 0.51, 0.47 | <0.001 | 0.41, 0.41 | 0.46   | 0.60, 0.49 | <0.001 |
|        | Tokyo Station              | Tokyo    | 0.58, 0.50 | <0.001 | 0.50, 0.48 | <0.05  | 0.52, 0.47 | <0.001 | 0.54, 0.50 | <0.001 | 0.44, 0.43 | <0.001 | 0.51, 0.42 | <0.001 |
|        | Shinbashi Station          | Tokyo    | 0.64, 0.48 | <0.001 | 0.51, 0.46 | <0.001 | 0.48, 0.43 | <0.001 | 0.51, 0.48 | <0.001 | 0.43, 0.43 | <0.05  | 0.51, 0.51 | 0.30   |
|        | Shinagawa Station          | Tokyo    | 0.62, 0.52 | <0.001 | 0.59, 0.50 | <0.001 | 0.59, 0.53 | <0.001 | 0.63, 0.59 | <0.001 | 0.50, 0.53 | <0.001 | 0.43, 0.42 | <0.05  |
|        | Ueno Station               | Tokyo    | 0.83, 0.71 | <0.001 | 0.61, 0.51 | <0.001 | 0.63, 0.58 | <0.001 | 0.60, 0.56 | <0.001 | 0.46, 0.44 | <0.001 | 0.43, 0.41 | <0.01  |
|        | Ginza Station              | Tokyo    | 0.63, 0.50 | <0.001 | 0.58, 0.52 | <0.001 | 0.57, 0.51 | <0.001 | 0.61, 0.58 | <0.001 | 0.45, 0.46 | 0.66   | 0.46, 0.40 | <0.001 |
|        | Roppongi Station           | Tokyo    | 0.57, 0.45 | <0.001 | 0.55, 0.52 | <0.001 | 0.50, 0.47 | <0.001 | 0.51, 0.47 | <0.001 | 0.47, 0.46 | 0.30   | 0.65, 0.67 | 0.19   |
|        | Kichijoji Station          | Tokyo    | 0.79, 0.64 | <0.001 | 0.50, 0.44 | <0.001 | 0.69, 0.67 | <0.001 | 0.63, 0.56 | <0.001 | 0.54, 0.53 | 0.95   | 0.63, 0.62 | 0.99   |
|        | Motomachi-Chukagai Station | Kanagawa | 0.56, 0.51 | <0.001 | 0.55, 0.51 | <0.001 | 0.57, 0.51 | <0.001 | 0.69, 0.75 | <0.001 | 0.69, 0.68 | 0.07   | 0.60, 0.54 | <0.001 |
|        | Sakuragicho Station        | Kanagawa | 0.68, 0.56 | <0.001 | 0.66, 0.56 | <0.001 | 0.63, 0.61 | <0.001 | 0.67, 0.64 | <0.001 | 0.61, 0.60 | 0.30   | 0.59, 0.58 | 0.39   |
|        | Kannai Station             | Kanagawa | 0.93, 0.81 | <0.001 | 0.65, 0.62 | <0.001 | 0.72, 0.63 | <0.001 | 0.58, 0.60 | <0.001 | 0.64, 0.60 | <0.01  | 1.24, 1.04 | <0.001 |
|        | Hamamatsu Station          | Shizuoka | –          | –      | –          | –      | –          | –      | –          | –      | –          | –      | –          | –      |
|        | Sakae Station              | Aichi    | 0.55, 0.51 | <0.001 | 0.44, 0.40 | <0.01  | 0.44, 0.40 | <0.05  | 0.42, 0.37 | <0.001 | 0.34, 0.35 | 0.11   | 0.37, 0.35 | 0.07   |
|        | Fushimi Station            | Aichi    | 0.61, 0.58 | <0.01  | 0.59, 0.52 | <0.01  | 0.59, 0.50 | <0.01  | 0.60, 0.54 | <0.05  | 0.49, 0.49 | 0.47   | 0.44, 0.39 | <0.05  |
|        | Kawaramachi Station        | Kyoto    | 0.61, 0.38 | <0.001 | 0.29, 0.22 | <0.001 | 0.41, 0.32 | <0.001 | 0.42, 0.37 | <0.001 | 0.37, 0.37 | 0.77   | 0.65, 0.68 | 0.12   |
|        | Shinsaibashi Station       | Osaka    | 0.52, 0.49 | <0.001 | 0.38, 0.37 | <0.05  | 0.47, 0.44 | 0.12   | 0.49, 0.49 | 0.84   | 0.43, 0.44 | <0.05  | 0.50, 0.49 | 0.90   |
|        | Namba Station              | Osaka    | 0.56, 0.47 | <0.001 | 0.33, 0.30 | <0.001 | 0.42, 0.39 | <0.001 | 0.42, 0.44 | 0.65   | 0.35, 0.36 | <0.05  | 0.50, 0.52 | <0.05  |
|        | Kitashinchi Station        | Osaka    | 0.48, 0.36 | <0.001 | 0.39, 0.34 | <0.001 | 0.46, 0.39 | <0.01  | 0.50, 0.44 | <0.001 | 0.39, 0.38 | <0.05  | 0.44, 0.43 | 0.06   |

|                         |           |            |        |            |        |            |        |            |        |            |        |            |        |   |
|-------------------------|-----------|------------|--------|------------|--------|------------|--------|------------|--------|------------|--------|------------|--------|---|
| Tamachi Station         | Okayama   | -          | -      | -          | -      | -          | -      | -          | -      | -          | -      | -          | -      | - |
| Hatchobori Station      | Hiroshima | -          | -      | -          | -      | -          | -      | -          | -      | -          | -      | -          | -      | - |
| Kawaramachi Station     | Kagawa    | -          | -      | -          | -      | -          | -      | -          | -      | -          | -      | -          | -      | - |
| Hakata Station          | Fukuoka   | 0.55, 0.41 | <0.001 | 0.54, 0.43 | <0.001 | 0.66, 0.56 | <0.001 | 0.58, 0.46 | <0.001 | 0.49, 0.41 | <0.001 | 0.58, 0.42 | <0.001 |   |
| Nakasu-kawabata Station | Fukuoka   | 0.52, 0.31 | <0.001 | 0.54, 0.42 | <0.001 | 0.67, 0.51 | <0.001 | 0.66, 0.53 | <0.001 | 0.59, 0.53 | <0.001 | 0.68, 0.56 | <0.001 |   |
| Kanko-dori Station      | Nagasaki  | -          | -      | -          | -      | -          | -      | -          | -      | -          | -      | -          | -      |   |
| Makishi Station         | Okinawa   | -          | -      | -          | -      | -          | -      | -          | -      | -          | -      | -          | -      |   |

08:00-11:59 AM

|                            |          |            |        |            |        |            |        |            |        |            |        |            |        |
|----------------------------|----------|------------|--------|------------|--------|------------|--------|------------|--------|------------|--------|------------|--------|
| Susukino Station           | Hokkaido | -          | -      | -          | -      | -          | -      | -          | -      | -          | -      | -          | -      |
| Odori Station              | Hokkaido | -          | -      | -          | -      | -          | -      | -          | -      | -          | -      | -          | -      |
| Central Hirosaki Station   | Aomori   | -          | -      | -          | -      | -          | -      | -          | -      | -          | -      | -          | -      |
| Kotodai-Koen Station       | Miyagi   | -          | -      | -          | -      | -          | -      | -          | -      | -          | -      | -          | -      |
| Tobu-Utsunomiya station    | Tochigi  | 0.89, 0.88 | 0.90   | 0.87, 0.92 | 0.25   | 0.81, 0.83 | 0.49   | 0.90, 0.88 | 0.35   | 0.80, 0.76 | 0.14   | 0.55, 0.51 | 0.23   |
| Chuo Maebashi Station      | Gunma    | -          | -      | -          | -      | -          | -      | -          | -      | -          | -      | -          | -      |
| Shibuya Station            | Tokyo    | 0.93, 0.96 | <0.001 | 0.64, 0.61 | <0.01  | 0.61, 0.57 | <0.001 | 0.59, 0.56 | <0.001 | 0.47, 0.46 | 0.23   | 0.55, 0.50 | <0.001 |
| Shibuya Center Street      | Tokyo    | 0.88, 0.91 | <0.001 | 0.59, 0.57 | <0.05  | 0.56, 0.52 | <0.001 | 0.54, 0.51 | <0.001 | 0.42, 0.42 | 0.64   | 0.49, 0.45 | <0.001 |
| Harajuku Station           | Tokyo    | 0.99, 1.01 | <0.001 | 0.81, 0.76 | <0.001 | 0.73, 0.69 | <0.001 | 0.68, 0.64 | <0.001 | 0.51, 0.51 | 0.11   | 0.72, 0.66 | <0.001 |
| Shinjuku Kabukicho         | Tokyo    | 0.87, 0.92 | <0.001 | 0.64, 0.63 | 0.64   | 0.63, 0.61 | <0.01  | 0.61, 0.59 | 0.13   | 0.47, 0.47 | 0.67   | 0.53, 0.49 | <0.001 |
| Ikebukuro Station          | Tokyo    | 0.97, 1.00 | <0.001 | 0.65, 0.64 | <0.001 | 0.67, 0.63 | <0.001 | 0.65, 0.62 | <0.001 | 0.51, 0.49 | <0.001 | 0.60, 0.52 | <0.001 |
| Tokyo Station              | Tokyo    | 1.07, 0.95 | <0.001 | 0.85, 0.77 | <0.001 | 0.80, 0.72 | <0.001 | 0.76, 0.70 | <0.001 | 0.52, 0.51 | <0.001 | 0.57, 0.46 | <0.001 |
| Shinbashi Station          | Tokyo    | 1.02, 0.91 | <0.001 | 0.76, 0.68 | <0.001 | 0.72, 0.65 | <0.001 | 0.71, 0.66 | <0.001 | 0.55, 0.54 | <0.01  | 0.63, 0.60 | <0.001 |
| Shinagawa Station          | Tokyo    | 0.92, 0.80 | <0.001 | 0.74, 0.65 | <0.001 | 0.66, 0.59 | <0.001 | 0.65, 0.59 | <0.001 | 0.50, 0.49 | <0.05  | 0.52, 0.49 | <0.001 |
| Ueno Station               | Tokyo    | 0.93, 0.87 | <0.001 | 0.68, 0.61 | <0.001 | 0.64, 0.59 | <0.001 | 0.62, 0.56 | <0.001 | 0.46, 0.43 | <0.001 | 0.43, 0.36 | <0.001 |
| Ginza Station              | Tokyo    | 1.42, 1.43 | <0.01  | 0.97, 0.95 | 0.30   | 0.96, 0.95 | 0.06   | 0.91, 0.87 | <0.001 | 0.68, 0.69 | 0.93   | 0.64, 0.59 | <0.001 |
| Roppongi Station           | Tokyo    | 0.97, 0.98 | 0.34   | 0.85, 0.84 | 0.98   | 0.78, 0.80 | <0.01  | 0.86, 0.88 | 0.05   | 0.64, 0.70 | <0.001 | 0.76, 0.77 | 0.81   |
| Kichijoji Station          | Tokyo    | 1.19, 1.23 | <0.001 | 0.77, 0.74 | <0.001 | 0.82, 0.79 | <0.001 | 0.76, 0.72 | <0.001 | 0.65, 0.61 | <0.001 | 0.69, 0.62 | <0.001 |
| Motomachi-Chukagai Station | Kanagawa | 0.94, 0.86 | <0.001 | 0.82, 0.82 | 0.30   | 0.90, 0.86 | <0.001 | 1.00, 1.01 | 0.98   | 0.76, 0.78 | <0.01  | 0.73, 0.64 | <0.001 |
| Sakuragicho Station        | Kanagawa | 1.37, 1.26 | <0.001 | 1.01, 0.95 | <0.001 | 0.95, 0.93 | <0.001 | 0.99, 0.95 | <0.001 | 0.83, 0.79 | <0.01  | 0.73, 0.68 | <0.001 |
| Kannai Station             | Kanagawa | 1.34, 1.27 | <0.001 | 0.90, 0.89 | 0.54   | 0.96, 0.88 | <0.001 | 0.97, 0.95 | 0.77   | 0.86, 0.85 | 0.32   | 0.94, 0.85 | <0.001 |
| Hamamatsu Station          | Shizuoka | -          | -      | -          | -      | -          | -      | -          | -      | -          | -      | -          | -      |
| Sakae Station              | Aichi    | 0.94, 0.90 | <0.01  | 0.81, 0.77 | <0.01  | 0.79, 0.75 | <0.05  | 0.75, 0.71 | <0.01  | 0.56, 0.56 | 0.81   | 0.54, 0.50 | 0.12   |

|                         |           |            |        |            |        |            |        |            |        |            |        |            |        |
|-------------------------|-----------|------------|--------|------------|--------|------------|--------|------------|--------|------------|--------|------------|--------|
| Fushimi Station         | Aichi     | 1.09, 1.05 | <0.05  | 0.98, 0.89 | <0.001 | 0.92, 0.87 | <0.01  | 0.92, 0.89 | <0.01  | 0.67, 0.66 | 0.88   | 0.68, 0.61 | <0.05  |
| Kawaramachi Station     | Kyoto     | 1.06, 1.05 | 0.21   | 0.65, 0.65 | 0.95   | 0.63, 0.64 | 0.44   | 0.64, 0.63 | 0.19   | 0.52, 0.50 | <0.05  | 0.48, 0.48 | 0.76   |
| Shinsaibashi Station    | Osaka     | 1.33, 1.33 | 0.71   | 1.08, 1.05 | <0.05  | 1.12, 1.08 | <0.05  | 1.06, 1.07 | 0.42   | 0.76, 0.79 | <0.01  | 0.86, 0.88 | 0.72   |
| Namba Station           | Osaka     | 0.89, 0.87 | <0.01  | 0.69, 0.67 | <0.01  | 0.65, 0.63 | <0.05  | 0.65, 0.64 | 0.19   | 0.46, 0.47 | 0.19   | 0.49, 0.48 | <0.05  |
| Kitashinchi Station     | Osaka     | 1.39, 1.30 | <0.01  | 0.92, 0.89 | <0.01  | 0.91, 0.89 | <0.01  | 0.87, 0.86 | 0.16   | 0.70, 0.71 | 0.10   | 0.80, 0.76 | <0.01  |
| Tamachi Station         | Okayama   | –          | –      | –          | –      | –          | –      | –          | –      | –          | –      | –          | –      |
| Hatchobori Station      | Hiroshima | –          | –      | –          | –      | –          | –      | –          | –      | –          | –      | –          | –      |
| Kawaramachi Station     | Kagawa    | –          | –      | –          | –      | –          | –      | –          | –      | –          | –      | –          | –      |
| Hakata Station          | Fukuoka   | 0.90, 0.78 | <0.001 | 0.75, 0.69 | <0.001 | 0.79, 0.71 | <0.001 | 0.73, 0.64 | <0.001 | 0.60, 0.53 | <0.001 | 0.61, 0.50 | <0.001 |
| Nakasu-kawabata Station | Fukuoka   | 1.07, 0.90 | <0.001 | 1.11, 1.04 | <0.01  | 1.20, 1.08 | <0.001 | 1.20, 1.10 | <0.001 | 0.92, 0.92 | 0.70   | 0.87, 0.79 | <0.01  |
| Kanko-dori Station      | Nagasaki  | –          | –      | –          | –      | –          | –      | –          | –      | –          | –      | –          | –      |
| Makishi Station         | Okinawa   | –          | –      | –          | –      | –          | –      | –          | –      | –          | –      | –          | –      |

12:00–15:59 PM

|                          |          |            |        |            |        |            |        |            |        |            |        |            |        |
|--------------------------|----------|------------|--------|------------|--------|------------|--------|------------|--------|------------|--------|------------|--------|
| Susukino Station         | Hokkaido | –          | –      | –          | –      | –          | –      | –          | –      | –          | –      | –          | –      |
| Odori Station            | Hokkaido | –          | –      | –          | –      | –          | –      | –          | –      | –          | –      | –          | –      |
| Central Hirosaki Station | Aomori   | –          | –      | –          | –      | –          | –      | –          | –      | –          | –      | –          | –      |
| Kotodai-Koen Station     | Miyagi   | –          | –      | –          | –      | –          | –      | –          | –      | –          | –      | –          | –      |
| Tobu-Utsunomiya station  | Tochigi  | 1.29, 1.21 | <0.001 | 0.69, 0.63 | <0.001 | 0.83, 0.75 | <0.01  | 0.85, 0.76 | <0.001 | 0.69, 0.61 | <0.01  | 0.49, 0.46 | <0.05  |
| Chuo Maebashi Station    | Gunma    | –          | –      | –          | –      | –          | –      | –          | –      | –          | –      | –          | –      |
| Shibuya Station          | Tokyo    | 0.99, 1.08 | <0.001 | 0.67, 0.63 | <0.01  | 0.62, 0.57 | <0.001 | 0.61, 0.54 | <0.001 | 0.44, 0.41 | <0.001 | 0.51, 0.46 | <0.001 |
| Shibuya Center Street    | Tokyo    | 0.93, 1.02 | <0.001 | 0.61, 0.59 | <0.05  | 0.57, 0.52 | <0.001 | 0.55, 0.49 | <0.001 | 0.39, 0.37 | <0.001 | 0.47, 0.42 | <0.001 |
| Harajuku Station         | Tokyo    | 1.29, 1.41 | <0.001 | 0.86, 0.83 | <0.001 | 0.77, 0.71 | <0.001 | 0.75, 0.67 | <0.001 | 0.55, 0.49 | <0.001 | 0.78, 0.68 | <0.001 |
| Shinjuku Kabukicho       | Tokyo    | 0.81, 0.90 | <0.001 | 0.63, 0.65 | <0.001 | 0.61, 0.59 | <0.05  | 0.60, 0.58 | <0.001 | 0.46, 0.45 | <0.001 | 0.45, 0.41 | <0.001 |
| Ikebukuro Station        | Tokyo    | 0.95, 1.04 | <0.001 | 0.65, 0.64 | <0.001 | 0.70, 0.65 | <0.001 | 0.70, 0.64 | <0.001 | 0.55, 0.50 | <0.001 | 0.57, 0.47 | <0.001 |
| Tokyo Station            | Tokyo    | 1.24, 1.15 | <0.01  | 0.93, 0.85 | <0.001 | 0.93, 0.84 | <0.001 | 0.92, 0.82 | <0.001 | 0.58, 0.56 | <0.001 | 0.53, 0.44 | <0.001 |
| Shinbashi Station        | Tokyo    | 1.10, 1.04 | <0.001 | 0.87, 0.76 | <0.001 | 0.82, 0.73 | <0.001 | 0.83, 0.75 | <0.001 | 0.65, 0.61 | <0.001 | 0.63, 0.58 | <0.001 |
| Shinagawa Station        | Tokyo    | 0.98, 0.88 | <0.001 | 0.79, 0.70 | <0.001 | 0.80, 0.69 | <0.001 | 0.77, 0.68 | <0.001 | 0.58, 0.54 | <0.001 | 0.47, 0.46 | <0.01  |
| Ueno Station             | Tokyo    | 0.89, 0.94 | <0.001 | 0.72, 0.70 | <0.001 | 0.71, 0.66 | <0.001 | 0.70, 0.64 | <0.001 | 0.50, 0.45 | <0.001 | 0.39, 0.35 | <0.001 |
| Ginza Station            | Tokyo    | 1.60, 1.71 | <0.001 | 1.02, 1.02 | 0.82   | 1.05, 1.01 | <0.001 | 1.00, 0.91 | <0.001 | 0.71, 0.65 | <0.001 | 0.63, 0.53 | <0.001 |
| Roppongi Station         | Tokyo    | 1.05, 1.09 | <0.001 | 0.89, 0.87 | 0.30   | 0.87, 0.87 | 0.38   | 0.89, 0.87 | <0.05  | 0.66, 0.69 | <0.001 | 0.79, 0.77 | 0.08   |
| Kichijoji Station        | Tokyo    | 1.13, 1.24 | <0.001 | 0.76, 0.76 | <0.01  | 0.78, 0.76 | <0.001 | 0.78, 0.73 | <0.001 | 0.66, 0.59 | <0.001 | 0.62, 0.56 | <0.001 |

|                            |           |            |        |            |        |            |        |            |        |            |        |            |        |
|----------------------------|-----------|------------|--------|------------|--------|------------|--------|------------|--------|------------|--------|------------|--------|
| Motomachi-Chukagai Station | Kanagawa  | 1.03, 0.94 | <0.001 | 0.79, 0.80 | 0.08   | 0.92, 0.91 | <0.05  | 0.94, 0.94 | 0.74   | 0.75, 0.73 | 0.06   | 0.74, 0.62 | <0.001 |
| Sakuragicho Station        | Kanagawa  | 1.40, 1.40 | 0.50   | 1.11, 1.04 | <0.001 | 1.01, 0.97 | <0.001 | 1.05, 1.00 | <0.001 | 0.86, 0.78 | <0.001 | 0.72, 0.63 | <0.001 |
| Kannai Station             | Kanagawa  | 1.37, 1.34 | 0.07   | 0.86, 0.84 | 0.12   | 0.92, 0.85 | <0.001 | 0.96, 0.92 | 0.07   | 0.89, 0.83 | <0.001 | 0.84, 0.74 | <0.001 |
| Hamamatsu Station          | Shizuoka  | -          | -      | -          | -      | -          | -      | -          | -      | -          | -      | -          | -      |
| Sakae Station              | Aichi     | 1.02, 1.02 | 0.65   | 0.80, 0.75 | <0.01  | 0.80, 0.75 | <0.05  | 0.79, 0.74 | <0.01  | 0.56, 0.54 | <0.05  | 0.48, 0.44 | <0.05  |
| Fushimi Station            | Aichi     | 1.17, 1.18 | 0.95   | 0.93, 0.83 | <0.01  | 0.93, 0.88 | <0.05  | 0.90, 0.87 | 0.12   | 0.67, 0.66 | 0.15   | 0.64, 0.58 | <0.01  |
| Kawaramachi Station        | Kyoto     | 1.04, 0.94 | <0.001 | 0.60, 0.57 | <0.001 | 0.60, 0.56 | <0.001 | 0.63, 0.56 | <0.001 | 0.47, 0.42 | <0.001 | 0.44, 0.39 | <0.001 |
| Shinsaibashi Station       | Osaka     | 1.19, 1.18 | 0.33   | 1.05, 1.02 | 0.55   | 1.09, 1.05 | 0.35   | 1.03, 1.02 | 0.49   | 0.72, 0.72 | 0.54   | 0.73, 0.72 | 0.27   |
| Namba Station              | Osaka     | 0.80, 0.80 | 0.92   | 0.62, 0.59 | <0.001 | 0.59, 0.58 | <0.001 | 0.58, 0.56 | <0.05  | 0.44, 0.43 | 0.30   | 0.44, 0.43 | <0.001 |
| Kitashinchi Station        | Osaka     | 1.42, 1.38 | 0.20   | 1.02, 0.97 | <0.001 | 1.01, 0.95 | <0.001 | 0.99, 0.97 | 0.19   | 0.77, 0.76 | 0.07   | 0.73, 0.68 | <0.05  |
| Tamachi Station            | Okayama   | -          | -      | -          | -      | -          | -      | -          | -      | -          | -      | -          | -      |
| Hatchobori Station         | Hiroshima | -          | -      | -          | -      | -          | -      | -          | -      | -          | -      | -          | -      |
| Kawaramachi Station        | Kagawa    | -          | -      | -          | -      | -          | -      | -          | -      | -          | -      | -          | -      |
| Hakata Station             | Fukuoka   | 0.87, 0.75 | <0.001 | 0.76, 0.68 | <0.001 | 0.87, 0.76 | <0.001 | 0.76, 0.66 | <0.001 | 0.65, 0.56 | <0.001 | 0.63, 0.50 | <0.001 |
| Nakasu-kawabata Station    | Fukuoka   | 1.05, 0.94 | <0.001 | 1.06, 1.02 | <0.01  | 1.23, 1.12 | <0.001 | 1.25, 1.18 | <0.001 | 1.00, 0.95 | <0.01  | 0.77, 0.74 | 0.30   |
| Kanko-dori Station         | Nagasaki  | -          | -      | -          | -      | -          | -      | -          | -      | -          | -      | -          | -      |
| Makishi Station            | Okinawa   | -          | -      | -          | -      | -          | -      | -          | -      | -          | -      | -          | -      |

16:00-19:59 PM

|                          |          |            |        |            |        |            |        |            |        |            |        |            |        |
|--------------------------|----------|------------|--------|------------|--------|------------|--------|------------|--------|------------|--------|------------|--------|
| Susukino Station         | Hokkaido | -          | -      | -          | -      | -          | -      | -          | -      | -          | -      | -          | -      |
| Odori Station            | Hokkaido | -          | -      | -          | -      | -          | -      | -          | -      | -          | -      | -          | -      |
| Central Hirosaki Station | Aomori   | -          | -      | -          | -      | -          | -      | -          | -      | -          | -      | -          | -      |
| Kotodai-Koen Station     | Miyagi   | -          | -      | -          | -      | -          | -      | -          | -      | -          | -      | -          | -      |
| Tobu-Utsunomiya station  | Tochigi  | 0.79, 0.60 | <0.001 | 0.64, 0.56 | <0.001 | 0.68, 0.61 | <0.01  | 0.75, 0.65 | <0.001 | 0.63, 0.53 | <0.01  | 0.44, 0.45 | 0.98   |
| Chuo Maebashi Station    | Gunma    | -          | -      | -          | -      | -          | -      | -          | -      | -          | -      | -          | -      |
| Shibuya Station          | Tokyo    | 0.88, 0.89 | 0.89   | 0.56, 0.52 | 0.43   | 0.53, 0.49 | <0.001 | 0.51, 0.48 | <0.001 | 0.37, 0.36 | 0.12   | 0.54, 0.46 | <0.001 |
| Shibuya Center Street    | Tokyo    | 0.82, 0.82 | 0.95   | 0.50, 0.47 | 0.40   | 0.47, 0.43 | <0.001 | 0.45, 0.42 | <0.001 | 0.32, 0.32 | 0.30   | 0.50, 0.42 | <0.001 |
| Harajuku Station         | Tokyo    | 1.06, 1.07 | 0.98   | 0.70, 0.67 | <0.001 | 0.64, 0.59 | <0.001 | 0.61, 0.56 | <0.001 | 0.47, 0.46 | <0.05  | 0.82, 0.69 | <0.001 |
| Shinjuku Kabukicho       | Tokyo    | 0.72, 0.74 | <0.001 | 0.56, 0.55 | 0.55   | 0.57, 0.53 | <0.001 | 0.57, 0.54 | <0.05  | 0.40, 0.40 | 0.39   | 0.45, 0.41 | <0.001 |
| Ikebukuro Station        | Tokyo    | 0.89, 0.87 | <0.05  | 0.60, 0.57 | <0.001 | 0.63, 0.58 | <0.001 | 0.61, 0.57 | <0.001 | 0.45, 0.43 | <0.001 | 0.55, 0.47 | <0.001 |
| Tokyo Station            | Tokyo    | 1.05, 0.90 | <0.001 | 0.75, 0.68 | <0.001 | 0.73, 0.65 | <0.001 | 0.72, 0.64 | <0.001 | 0.46, 0.45 | <0.01  | 0.47, 0.39 | <0.001 |
| Shinbashi Station        | Tokyo    | 1.05, 0.89 | <0.001 | 0.76, 0.67 | <0.001 | 0.71, 0.64 | <0.001 | 0.71, 0.67 | <0.001 | 0.51, 0.49 | <0.01  | 0.49, 0.45 | <0.001 |

|                            |           |            |        |            |        |            |        |            |        |            |        |            |        |
|----------------------------|-----------|------------|--------|------------|--------|------------|--------|------------|--------|------------|--------|------------|--------|
| Shinagawa Station          | Tokyo     | 0.83, 0.70 | <0.001 | 0.64, 0.58 | <0.001 | 0.65, 0.58 | <0.001 | 0.65, 0.59 | <0.001 | 0.46, 0.47 | 0.11   | 0.48, 0.44 | <0.001 |
| Ueno Station               | Tokyo     | 0.81, 0.77 | <0.001 | 0.66, 0.61 | <0.001 | 0.66, 0.60 | <0.001 | 0.65, 0.59 | <0.001 | 0.44, 0.43 | <0.01  | 0.40, 0.36 | <0.001 |
| Ginza Station              | Tokyo     | 1.27, 1.20 | <0.001 | 0.87, 0.82 | <0.001 | 0.85, 0.79 | <0.001 | 0.82, 0.74 | <0.001 | 0.56, 0.53 | <0.001 | 0.50, 0.41 | <0.001 |
| Roppongi Station           | Tokyo     | 1.00, 1.02 | 0.65   | 0.82, 0.82 | 0.83   | 0.76, 0.77 | <0.05  | 0.79, 0.79 | 0.24   | 0.61, 0.62 | 0.76   | 0.61, 0.57 | <0.001 |
| Kichijoji Station          | Tokyo     | 0.92, 0.96 | <0.001 | 0.65, 0.63 | <0.01  | 0.62, 0.60 | <0.001 | 0.61, 0.58 | <0.001 | 0.47, 0.44 | <0.001 | 0.50, 0.44 | <0.001 |
| Motomachi-Chukagai Station | Kanagawa  | 0.94, 0.90 | <0.001 | 0.67, 0.67 | 1.00   | 0.76, 0.70 | <0.001 | 0.79, 0.80 | 0.09   | 0.59, 0.59 | 0.19   | 0.64, 0.55 | <0.001 |
| Sakuragicho Station        | Kanagawa  | 1.12, 1.05 | <0.001 | 0.84, 0.76 | <0.001 | 0.82, 0.75 | <0.001 | 0.85, 0.77 | <0.001 | 0.62, 0.58 | <0.001 | 0.62, 0.54 | <0.001 |
| Kannai Station             | Kanagawa  | 1.10, 1.05 | <0.001 | 0.81, 0.78 | <0.001 | 0.88, 0.81 | <0.001 | 0.88, 0.85 | <0.01  | 0.74, 0.69 | <0.001 | 0.71, 0.62 | <0.001 |
| Hamamatsu Station          | Shizuoka  | -          | -      | -          | -      | -          | -      | -          | -      | -          | -      | -          | -      |
| Sakae Station              | Aichi     | 0.80, 0.76 | <0.001 | 0.69, 0.64 | <0.001 | 0.65, 0.60 | <0.01  | 0.61, 0.58 | <0.01  | 0.42, 0.42 | 0.85   | 0.46, 0.40 | <0.01  |
| Fushimi Station            | Aichi     | 1.02, 0.96 | <0.01  | 0.78, 0.69 | <0.001 | 0.79, 0.72 | <0.01  | 0.72, 0.68 | <0.05  | 0.46, 0.45 | 0.08   | 0.51, 0.46 | <0.01  |
| Kawaramachi Station        | Kyoto     | 0.80, 0.70 | <0.001 | 0.47, 0.42 | <0.001 | 0.55, 0.48 | <0.001 | 0.54, 0.47 | <0.001 | 0.39, 0.35 | <0.001 | 0.49, 0.39 | <0.001 |
| Shinsaibashi Station       | Osaka     | 1.00, 0.93 | <0.001 | 0.86, 0.81 | <0.001 | 0.91, 0.85 | <0.01  | 0.88, 0.83 | 0.11   | 0.58, 0.60 | <0.01  | 0.62, 0.59 | <0.01  |
| Namba Station              | Osaka     | 0.72, 0.68 | <0.001 | 0.58, 0.55 | <0.001 | 0.57, 0.54 | <0.001 | 0.57, 0.55 | <0.01  | 0.40, 0.40 | 0.43   | 0.43, 0.41 | <0.001 |
| Kitashinchi Station        | Osaka     | 1.11, 0.99 | <0.001 | 0.79, 0.73 | <0.001 | 0.83, 0.74 | <0.001 | 0.79, 0.75 | <0.01  | 0.56, 0.55 | 0.73   | 0.62, 0.56 | <0.001 |
| Tamachi Station            | Okayama   | -          | -      | -          | -      | -          | -      | -          | -      | -          | -      | -          | -      |
| Hatchobori Station         | Hiroshima | -          | -      | -          | -      | -          | -      | -          | -      | -          | -      | -          | -      |
| Kawaramachi Station        | Kagawa    | -          | -      | -          | -      | -          | -      | -          | -      | -          | -      | -          | -      |
| Hakata Station             | Fukuoka   | 0.75, 0.61 | <0.001 | 0.69, 0.59 | <0.001 | 0.75, 0.62 | <0.001 | 0.65, 0.55 | <0.001 | 0.51, 0.43 | <0.001 | 0.61, 0.45 | <0.001 |
| Nakasu-kawabata Station    | Fukuoka   | 0.85, 0.72 | <0.001 | 0.93, 0.84 | <0.001 | 0.99, 0.85 | <0.001 | 0.94, 0.85 | <0.001 | 0.65, 0.61 | <0.01  | 0.72, 0.62 | <0.01  |
| Kanko-dori Station         | Nagasaki  | -          | -      | -          | -      | -          | -      | -          | -      | -          | -      | -          | -      |
| Makishi Station            | Okinawa   | -          | -      | -          | -      | -          | -      | -          | -      | -          | -      | -          | -      |

20:00-23:59 PM

|                          |          |            |        |            |        |            |        |            |        |            |        |            |        |
|--------------------------|----------|------------|--------|------------|--------|------------|--------|------------|--------|------------|--------|------------|--------|
| Susukino Station         | Hokkaido | -          | -      | -          | -      | -          | -      | -          | -      | -          | -      | -          | -      |
| Odori Station            | Hokkaido | -          | -      | -          | -      | -          | -      | -          | -      | -          | -      | -          | -      |
| Central Hirosaki Station | Aomori   | -          | -      | -          | -      | -          | -      | -          | -      | -          | -      | -          | -      |
| Kotodai-Koen Station     | Miyagi   | -          | -      | -          | -      | -          | -      | -          | -      | -          | -      | -          | -      |
| Tobu-Utsunomiya station  | Tochigi  | 0.49, 0.28 | <0.001 | 0.33, 0.31 | <0.01  | 0.38, 0.38 | 0.85   | 0.43, 0.41 | <0.05  | 0.33, 0.28 | <0.01  | 0.45, 0.30 | <0.001 |
| Chuo Maebashi Station    | Gunma    | -          | -      | -          | -      | -          | -      | -          | -      | -          | -      | -          | -      |
| Shibuya Station          | Tokyo    | 0.64, 0.47 | <0.001 | 0.33, 0.30 | <0.001 | 0.32, 0.30 | <0.001 | 0.29, 0.26 | <0.001 | 0.21, 0.20 | <0.001 | 0.53, 0.35 | <0.001 |
| Shibuya Center Street    | Tokyo    | 0.61, 0.44 | <0.001 | 0.30, 0.27 | <0.001 | 0.29, 0.27 | <0.001 | 0.26, 0.24 | <0.001 | 0.19, 0.17 | <0.001 | 0.50, 0.32 | <0.001 |

|                            |           |            |        |            |        |            |        |            |        |            |        |            |        |
|----------------------------|-----------|------------|--------|------------|--------|------------|--------|------------|--------|------------|--------|------------|--------|
| Harajuku Station           | Tokyo     | 0.77, 0.64 | <0.001 | 0.47, 0.44 | <0.001 | 0.44, 0.43 | <0.05  | 0.36, 0.35 | <0.001 | 0.31, 0.28 | <0.001 | 0.67, 0.57 | <0.001 |
| Shinjuku Kabukicho         | Tokyo     | 0.56, 0.42 | <0.001 | 0.37, 0.30 | <0.001 | 0.36, 0.31 | <0.001 | 0.34, 0.30 | <0.001 | 0.23, 0.21 | <0.001 | 0.47, 0.32 | <0.001 |
| Ikebukuro Station          | Tokyo     | 0.62, 0.47 | <0.001 | 0.39, 0.31 | <0.001 | 0.40, 0.31 | <0.001 | 0.36, 0.28 | <0.001 | 0.27, 0.21 | <0.001 | 0.48, 0.30 | <0.001 |
| Tokyo Station              | Tokyo     | 0.72, 0.49 | <0.001 | 0.46, 0.38 | <0.001 | 0.44, 0.37 | <0.001 | 0.39, 0.32 | <0.001 | 0.25, 0.19 | <0.001 | 0.40, 0.26 | <0.001 |
| Shinbashi Station          | Tokyo     | 0.79, 0.52 | <0.001 | 0.47, 0.38 | <0.001 | 0.45, 0.36 | <0.001 | 0.40, 0.32 | <0.001 | 0.28, 0.21 | <0.001 | 0.39, 0.28 | <0.001 |
| Shinagawa Station          | Tokyo     | 0.62, 0.44 | <0.001 | 0.46, 0.39 | <0.001 | 0.44, 0.38 | <0.001 | 0.41, 0.35 | <0.001 | 0.27, 0.26 | <0.01  | 0.39, 0.32 | <0.001 |
| Ueno Station               | Tokyo     | 0.61, 0.50 | <0.001 | 0.43, 0.37 | <0.001 | 0.44, 0.37 | <0.001 | 0.39, 0.33 | <0.001 | 0.25, 0.20 | <0.001 | 0.34, 0.25 | <0.001 |
| Ginza Station              | Tokyo     | 0.84, 0.55 | <0.001 | 0.52, 0.38 | <0.001 | 0.47, 0.35 | <0.001 | 0.43, 0.31 | <0.001 | 0.28, 0.19 | <0.001 | 0.36, 0.22 | <0.001 |
| Roppongi Station           | Tokyo     | 0.71, 0.58 | <0.001 | 0.53, 0.50 | <0.001 | 0.46, 0.41 | <0.001 | 0.44, 0.41 | <0.001 | 0.36, 0.29 | <0.001 | 0.48, 0.39 | <0.001 |
| Kichijoji Station          | Tokyo     | 0.56, 0.46 | <0.001 | 0.40, 0.33 | <0.001 | 0.40, 0.36 | <0.001 | 0.36, 0.30 | <0.001 | 0.26, 0.22 | <0.001 | 0.42, 0.36 | <0.001 |
| Motomachi-Chukagai Station | Kanagawa  | 0.51, 0.44 | <0.001 | 0.41, 0.39 | <0.001 | 0.43, 0.38 | <0.001 | 0.53, 0.54 | <0.001 | 0.45, 0.44 | <0.05  | 0.46, 0.43 | <0.001 |
| Sakuragicho Station        | Kanagawa  | 0.78, 0.57 | <0.001 | 0.50, 0.41 | <0.001 | 0.47, 0.41 | <0.001 | 0.44, 0.38 | <0.001 | 0.37, 0.32 | <0.001 | 0.46, 0.37 | <0.001 |
| Kannai Station             | Kanagawa  | 0.65, 0.55 | <0.001 | 0.53, 0.45 | <0.001 | 0.58, 0.46 | <0.001 | 0.46, 0.39 | <0.001 | 0.39, 0.28 | <0.001 | 0.52, 0.38 | <0.001 |
| Hamamatsu Station          | Shizuoka  | -          | -      | -          | -      | -          | -      | -          | -      | -          | -      | -          | -      |
| Sakae Station              | Aichi     | 0.45, 0.38 | <0.001 | 0.36, 0.33 | 0.08   | 0.35, 0.32 | 0.05   | 0.30, 0.26 | <0.01  | 0.20, 0.18 | <0.01  | 0.26, 0.20 | <0.001 |
| Fushimi Station            | Aichi     | 0.61, 0.51 | <0.001 | 0.40, 0.34 | <0.05  | 0.39, 0.34 | <0.05  | 0.31, 0.29 | 0.17   | 0.21, 0.20 | <0.05  | 0.28, 0.23 | <0.001 |
| Kawaramachi Station        | Kyoto     | 0.60, 0.34 | <0.001 | 0.26, 0.19 | <0.001 | 0.31, 0.22 | <0.001 | 0.30, 0.23 | <0.001 | 0.24, 0.17 | <0.001 | 0.41, 0.27 | <0.001 |
| Shinsaibashi Station       | Osaka     | 0.57, 0.47 | <0.001 | 0.40, 0.35 | <0.001 | 0.43, 0.39 | <0.001 | 0.36, 0.33 | <0.001 | 0.25, 0.24 | <0.001 | 0.39, 0.33 | <0.001 |
| Namba Station              | Osaka     | 0.46, 0.36 | <0.001 | 0.33, 0.27 | <0.001 | 0.34, 0.28 | <0.001 | 0.30, 0.26 | <0.001 | 0.21, 0.18 | <0.001 | 0.36, 0.29 | <0.001 |
| Kitashinchi Station        | Osaka     | 0.55, 0.40 | <0.001 | 0.39, 0.32 | <0.001 | 0.40, 0.31 | <0.001 | 0.33, 0.27 | <0.001 | 0.23, 0.20 | <0.001 | 0.33, 0.23 | <0.001 |
| Tamachi Station            | Okayama   | -          | -      | -          | -      | -          | -      | -          | -      | -          | -      | -          | -      |
| Hatchobori Station         | Hiroshima | -          | -      | -          | -      | -          | -      | -          | -      | -          | -      | -          | -      |
| Kawaramachi Station        | Kagawa    | -          | -      | -          | -      | -          | -      | -          | -      | -          | -      | -          | -      |
| Hakata Station             | Fukuoka   | 0.48, 0.28 | <0.001 | 0.44, 0.30 | <0.001 | 0.47, 0.33 | <0.01  | 0.37, 0.26 | <0.001 | 0.28, 0.22 | <0.001 | 0.38, 0.26 | <0.001 |
| Nakasu-kawabata Station    | Fukuoka   | 0.45, 0.32 | <0.001 | 0.45, 0.34 | <0.001 | 0.49, 0.34 | <0.001 | 0.44, 0.30 | <0.001 | 0.33, 0.23 | <0.001 | 0.43, 0.31 | <0.001 |
| Kanko-dori Station         | Nagasaki  | -          | -      | -          | -      | -          | -      | -          | -      | -          | -      | -          | -      |
| Makishi Station            | Okinawa   | -          | -      | -          | -      | -          | -      | -          | -      | -          | -      | -          | -      |

**Table S3: P-values for the comparison of human mobility among age groups using the Kruskal-Wallis test, by time frames and by the first and second declaration of a state of emergency.** The ratios of the rolling seven-day daily average of the total population to a baseline on January 16, 2020 during the declaration of a state of emergency was compared among age groups.

| Declaration        | Time frame     | Area                       | Prefecture | Median ratio by age group |      |      |      |        |       | P value |
|--------------------|----------------|----------------------------|------------|---------------------------|------|------|------|--------|-------|---------|
|                    |                |                            |            | 20s                       | 30s  | 40s  | 50s  | 60s    | ≥ 70s |         |
| First              | 0:00–7:59 AM   | Susukino Station           | Hokkaido   | 0.33                      | 0.27 | 0.34 | 0.37 | 0.36   | 0.53  | <0.001  |
|                    |                | Odori Station              | Hokkaido   | 0.46                      | 0.73 | 0.69 | 0.75 | 0.67   | 0.66  | <0.001  |
|                    |                | Central Hirosaki Station   | Aomori     | 0.05                      | 0.92 | 0.75 | 0.64 | 0.91   | 0.86  | <0.001  |
|                    |                | Kotodai-Koen Station       | Miyagi     | 0.51                      | 0.48 | 0.66 | 0.73 | 0.82   | 0.57  | <0.001  |
|                    |                | Tobu-Utsunomiya station    | Tochigi    | 0.54                      | 0.66 | 0.57 | 0.76 | 0.84   | 0.61  | <0.001  |
|                    |                | Chuo Maebashi Station      | Gunma      | 1.86                      | 0.52 | 0.56 | 0.69 | 0.45   | 0.65  | <0.001  |
|                    |                | Shibuya Station            | Tokyo      | 0.35                      | 0.46 | 0.60 | 0.64 | 0.61   | 0.59  | <0.001  |
|                    |                | Shibuya Center Street      | Tokyo      | 0.31                      | 0.41 | 0.54 | 0.57 | 0.54   | 0.55  | <0.001  |
|                    |                | Harajuku Station           | Tokyo      | 0.50                      | 0.58 | 0.83 | 0.84 | 0.88   | 1.17  | <0.001  |
|                    |                | Shinjuku Kabukicho         | Tokyo      | 0.30                      | 0.55 | 0.53 | 0.60 | 0.64   | 0.54  | <0.001  |
|                    |                | Ikebukuro Station          | Tokyo      | 0.50                      | 0.72 | 0.76 | 0.82 | 0.75   | 0.69  | <0.001  |
|                    |                | Tokyo Station              | Tokyo      | 0.38                      | 0.60 | 0.60 | 0.61 | 0.58   | 0.45  | <0.001  |
|                    |                | Shinbashi Station          | Tokyo      | 0.37                      | 0.48 | 0.56 | 0.50 | 0.53   | 0.47  | <0.001  |
|                    |                | Shinagawa Station          | Tokyo      | 0.48                      | 0.60 | 0.61 | 0.61 | 0.62   | 0.51  | <0.001  |
|                    |                | Ueno Station               | Tokyo      | 0.74                      | 0.74 | 0.77 | 0.78 | 0.66   | 0.56  | <0.001  |
|                    |                | Ginza Station              | Tokyo      | 0.44                      | 0.48 | 0.58 | 0.55 | 0.51   | 0.40  | <0.001  |
|                    |                | Roppongi Station           | Tokyo      | 0.28                      | 0.49 | 0.62 | 0.58 | 0.59   | 0.52  | <0.001  |
|                    |                | Kichijoji Station          | Tokyo      | 0.74                      | 0.56 | 0.75 | 0.72 | 0.71   | 0.90  | <0.001  |
|                    |                | Motomachi-Chukagai Station | Kanagawa   | 0.69                      | 0.80 | 0.79 | 0.81 | 1.01   | 0.65  | <0.001  |
|                    |                | Sakuragicho Station        | Kanagawa   | 0.47                      | 0.79 | 0.85 | 0.75 | 0.70   | 0.61  | <0.001  |
|                    |                | Kannai Station             | Kanagawa   | 0.92                      | 0.72 | 0.88 | 0.84 | 0.74   | 1.18  | <0.001  |
|                    |                | Hamamatsu Station          | Shizuoka   | 0.31                      | 0.61 | 0.55 | 0.70 | 0.71   | 0.78  | <0.001  |
|                    |                | Sakae Station              | Aichi      | 0.48                      | 0.47 | 0.51 | 0.50 | 0.57   | 0.41  | <0.01   |
|                    |                | Fushimi Station            | Aichi      | 0.47                      | 0.66 | 0.66 | 0.82 | 0.71   | 0.42  | <0.001  |
|                    |                | Kawaramachi Station        | Kyoto      | 0.29                      | 0.39 | 0.54 | 0.57 | 0.51   | 0.71  | <0.001  |
|                    |                | Shinsaibashi Station       | Osaka      | 0.32                      | 0.43 | 0.54 | 0.53 | 0.56   | 0.53  | <0.001  |
|                    |                | Namba Station              | Osaka      | 0.35                      | 0.38 | 0.52 | 0.52 | 0.50   | 0.43  | <0.001  |
|                    |                | Kitashinchi Station        | Osaka      | 0.27                      | 0.33 | 0.38 | 0.46 | 0.43   | 0.46  | <0.001  |
|                    |                | Tamachi Station            | Okayama    | 0.68                      | 0.42 | 0.81 | 0.70 | 0.63   | 0.69  | <0.001  |
|                    |                | Hatchobori Station         | Hiroshima  | 0.32                      | 0.37 | 0.47 | 0.41 | 0.45   | 0.38  | <0.001  |
|                    |                | Kawaramachi Station        | Kagawa     | 0.47                      | 0.84 | 1.07 | 1.63 | 1.46   | 1.45  | <0.001  |
|                    |                | Hakata Station             | Fukuoka    | 0.35                      | 0.46 | 0.58 | 0.51 | 0.50   | 0.46  | <0.001  |
|                    |                | Nakasu-kawabata Station    | Fukuoka    | 0.48                      | 0.29 | 0.39 | 0.53 | 0.54   | 0.40  | <0.001  |
| Kanko-dori Station | Nagasaki       | 0.73                       | 0.69       | 0.58                      | 0.74 | 0.82 | 0.61 | <0.001 |       |         |
| Makishi Station    | Okinawa        | 0.85                       | 0.60       | 1.07                      | 0.73 | 0.91 | 0.85 | <0.001 |       |         |
|                    | 08:00–11:59 AM |                            |            |                           |      |      |      |        |       |         |
|                    |                | Susukino Station           | Hokkaido   | 0.65                      | 0.67 | 0.70 | 0.73 | 0.63   | 0.60  | <0.001  |
|                    |                | Odori Station              | Hokkaido   | 0.51                      | 0.69 | 0.66 | 0.64 | 0.58   | 0.49  | <0.001  |
|                    |                | Central Hirosaki Station   | Aomori     | 0.49                      | 0.84 | 0.78 | 0.87 | 1.12   | 0.91  | <0.001  |
|                    |                | Kotodai-Koen Station       | Miyagi     | 0.56                      | 0.77 | 0.69 | 0.72 | 0.71   | 0.62  | <0.001  |

|                            |           |      |      |      |      |      |      |        |
|----------------------------|-----------|------|------|------|------|------|------|--------|
| Tobu-Utsunomiya station    | Tochigi   | 0.80 | 0.76 | 0.64 | 0.76 | 0.72 | 0.51 | <0.001 |
| Chuo Maebashi Station      | Gunma     | 1.63 | 0.39 | 0.62 | 0.79 | 0.54 | 0.81 | <0.001 |
| Shibuya Station            | Tokyo     | 0.32 | 0.44 | 0.50 | 0.55 | 0.48 | 0.38 | <0.001 |
| Shibuya Center Street      | Tokyo     | 0.29 | 0.41 | 0.46 | 0.50 | 0.44 | 0.36 | <0.001 |
| Harajuku Station           | Tokyo     | 0.38 | 0.57 | 0.57 | 0.66 | 0.60 | 0.55 | <0.001 |
| Shinjuku Kabukicho         | Tokyo     | 0.40 | 0.51 | 0.52 | 0.53 | 0.48 | 0.36 | <0.001 |
| Ikebukuro Station          | Tokyo     | 0.47 | 0.59 | 0.65 | 0.68 | 0.59 | 0.45 | <0.001 |
| Tokyo Station              | Tokyo     | 0.34 | 0.44 | 0.45 | 0.43 | 0.39 | 0.30 | <0.001 |
| Shinbashi Station          | Tokyo     | 0.39 | 0.39 | 0.46 | 0.44 | 0.46 | 0.39 | <0.001 |
| Shinagawa Station          | Tokyo     | 0.42 | 0.40 | 0.39 | 0.39 | 0.39 | 0.33 | <0.001 |
| Ueno Station               | Tokyo     | 0.48 | 0.58 | 0.61 | 0.61 | 0.50 | 0.38 | <0.001 |
| Ginza Station              | Tokyo     | 0.45 | 0.42 | 0.48 | 0.47 | 0.42 | 0.31 | <0.001 |
| Roppongi Station           | Tokyo     | 0.50 | 0.53 | 0.60 | 0.64 | 0.59 | 0.46 | <0.001 |
| Kichijoji Station          | Tokyo     | 0.54 | 0.57 | 0.66 | 0.67 | 0.66 | 0.55 | <0.001 |
| Motomachi-Chukagai Station | Kanagawa  | 0.84 | 0.75 | 0.81 | 0.85 | 0.81 | 0.70 | <0.001 |
| Sakuragicho Station        | Kanagawa  | 0.68 | 0.66 | 0.73 | 0.72 | 0.65 | 0.47 | <0.001 |
| Kannai Station             | Kanagawa  | 0.74 | 0.69 | 0.73 | 0.87 | 0.80 | 0.71 | <0.001 |
| Hamamatsu Station          | Shizuoka  | 0.57 | 0.59 | 0.65 | 0.61 | 0.59 | 0.47 | <0.001 |
| Sakae Station              | Aichi     | 0.44 | 0.53 | 0.58 | 0.61 | 0.58 | 0.43 | <0.001 |
| Fushimi Station            | Aichi     | 0.60 | 0.56 | 0.70 | 0.71 | 0.60 | 0.42 | <0.001 |
| Kawaramachi Station        | Kyoto     | 0.44 | 0.57 | 0.64 | 0.65 | 0.54 | 0.39 | <0.001 |
| Shinsaibashi Station       | Osaka     | 0.52 | 0.57 | 0.69 | 0.67 | 0.64 | 0.59 | <0.001 |
| Namba Station              | Osaka     | 0.37 | 0.46 | 0.48 | 0.52 | 0.46 | 0.34 | <0.001 |
| Kitashinchi Station        | Osaka     | 0.53 | 0.51 | 0.57 | 0.60 | 0.56 | 0.41 | <0.001 |
| Tamachi Station            | Okayama   | 0.84 | 0.87 | 0.95 | 0.89 | 0.76 | 0.69 | <0.001 |
| Hatchobori Station         | Hiroshima | 0.55 | 0.62 | 0.68 | 0.67 | 0.58 | 0.53 | <0.01  |
| Kawaramachi Station        | Kagawa    | 0.72 | 0.84 | 0.77 | 0.90 | 0.77 | 0.89 | <0.001 |
| Hakata Station             | Fukuoka   | 0.41 | 0.45 | 0.50 | 0.47 | 0.46 | 0.36 | <0.001 |
| Nakasu-kawabata Station    | Fukuoka   | 0.63 | 0.61 | 0.66 | 0.74 | 0.63 | 0.55 | <0.001 |
| Kanko-dori Station         | Nagasaki  | 0.84 | 0.71 | 0.78 | 0.81 | 0.77 | 0.78 | <0.01  |
| Makishi Station            | Okinawa   | 1.11 | 0.89 | 0.93 | 0.84 | 0.95 | 0.69 | <0.001 |

12:00-15:59 PM

|                          |          |      |      |      |      |      |      |        |
|--------------------------|----------|------|------|------|------|------|------|--------|
| Susukino Station         | Hokkaido | 0.62 | 0.66 | 0.74 | 0.76 | 0.68 | 0.44 | <0.001 |
| Odori Station            | Hokkaido | 0.55 | 0.73 | 0.67 | 0.64 | 0.57 | 0.37 | <0.001 |
| Central Hirosaki Station | Aomori   | 1.07 | 0.82 | 0.87 | 0.93 | 0.93 | 0.92 | <0.001 |
| Kotodai-Koen Station     | Miyagi   | 0.64 | 0.72 | 0.72 | 0.76 | 0.68 | 0.42 | <0.001 |
| Tobu-Utsunomiya station  | Tochigi  | 1.18 | 0.58 | 0.55 | 0.71 | 0.60 | 0.34 | <0.001 |
| Chuo Maebashi Station    | Gunma    | 1.79 | 0.46 | 0.57 | 0.80 | 0.77 | 0.67 | <0.001 |
| Shibuya Station          | Tokyo    | 0.26 | 0.41 | 0.46 | 0.49 | 0.42 | 0.29 | <0.001 |
| Shibuya Center Street    | Tokyo    | 0.24 | 0.38 | 0.43 | 0.45 | 0.37 | 0.27 | <0.001 |
| Harajuku Station         | Tokyo    | 0.38 | 0.52 | 0.51 | 0.60 | 0.54 | 0.47 | <0.001 |
| Shinjuku Kabukicho       | Tokyo    | 0.30 | 0.45 | 0.45 | 0.46 | 0.38 | 0.27 | <0.001 |
| Ikebukuro Station        | Tokyo    | 0.39 | 0.49 | 0.54 | 0.58 | 0.49 | 0.34 | <0.001 |
| Tokyo Station            | Tokyo    | 0.32 | 0.41 | 0.42 | 0.42 | 0.36 | 0.22 | <0.001 |
| Shinbashi Station        | Tokyo    | 0.35 | 0.36 | 0.42 | 0.40 | 0.41 | 0.30 | <0.001 |
| Shinagawa Station        | Tokyo    | 0.43 | 0.41 | 0.41 | 0.40 | 0.38 | 0.29 | <0.001 |
| Ueno Station             | Tokyo    | 0.42 | 0.60 | 0.58 | 0.59 | 0.46 | 0.32 | <0.001 |
| Ginza Station            | Tokyo    | 0.27 | 0.32 | 0.39 | 0.36 | 0.28 | 0.21 | <0.001 |
| Roppongi Station         | Tokyo    | 0.46 | 0.52 | 0.58 | 0.57 | 0.51 | 0.44 | <0.001 |



|                            |           |      |      |      |      |      |      |        |
|----------------------------|-----------|------|------|------|------|------|------|--------|
| Kichijoji Station          | Tokyo     | 0.49 | 0.53 | 0.56 | 0.61 | 0.59 | 0.43 | <0.001 |
| Motomachi-Chukagai Station | Kanagawa  | 0.85 | 0.72 | 0.94 | 0.88 | 0.78 | 0.68 | <0.001 |
| Sakuragicho Station        | Kanagawa  | 0.56 | 0.64 | 0.70 | 0.69 | 0.55 | 0.39 | <0.001 |
| Kannai Station             | Kanagawa  | 0.86 | 0.70 | 0.70 | 0.86 | 0.80 | 0.59 | <0.001 |
| Hamamatsu Station          | Shizuoka  | 0.50 | 0.53 | 0.61 | 0.59 | 0.54 | 0.43 | <0.001 |
| Sakae Station              | Aichi     | 0.43 | 0.55 | 0.61 | 0.67 | 0.52 | 0.37 | <0.001 |
| Fushimi Station            | Aichi     | 0.62 | 0.57 | 0.74 | 0.72 | 0.56 | 0.41 | <0.001 |
| Kawaramachi Station        | Kyoto     | 0.35 | 0.47 | 0.50 | 0.53 | 0.39 | 0.34 | <0.001 |
| Shinsaibashi Station       | Osaka     | 0.43 | 0.52 | 0.65 | 0.61 | 0.55 | 0.43 | <0.001 |
| Namba Station              | Osaka     | 0.30 | 0.37 | 0.38 | 0.38 | 0.32 | 0.27 | <0.001 |
| Kitashinchi Station        | Osaka     | 0.45 | 0.52 | 0.54 | 0.56 | 0.49 | 0.33 | <0.001 |
| Tamachi Station            | Okayama   | 0.81 | 0.93 | 0.91 | 0.87 | 0.73 | 0.56 | <0.001 |
| Hatchobori Station         | Hiroshima | 0.51 | 0.55 | 0.63 | 0.64 | 0.52 | 0.43 | <0.001 |
| Kawaramachi Station        | Kagawa    | 0.59 | 0.75 | 0.88 | 0.94 | 0.84 | 0.72 | <0.001 |
| Hakata Station             | Fukuoka   | 0.36 | 0.37 | 0.45 | 0.38 | 0.38 | 0.29 | <0.001 |
| Nakasu-kawabata Station    | Fukuoka   | 0.58 | 0.63 | 0.73 | 0.78 | 0.62 | 0.43 | <0.001 |
| Kanko-dori Station         | Nagasaki  | 0.71 | 0.67 | 0.72 | 0.75 | 0.68 | 0.61 | <0.001 |
| Makishi Station            | Okinawa   | 1.04 | 0.91 | 0.87 | 0.94 | 0.91 | 0.85 | <0.001 |

16:00-19:59 PM

|                            |           |      |      |      |      |      |      |        |
|----------------------------|-----------|------|------|------|------|------|------|--------|
| Susukino Station           | Hokkaido  | 0.47 | 0.49 | 0.55 | 0.54 | 0.44 | 0.35 | <0.001 |
| Odori Station              | Hokkaido  | 0.53 | 0.64 | 0.61 | 0.57 | 0.50 | 0.41 | <0.001 |
| Central Hirosaki Station   | Aomori    | 0.48 | 0.81 | 0.73 | 0.75 | 1.06 | 0.94 | <0.001 |
| Kotodai-Koen Station       | Miyagi    | 0.60 | 0.67 | 0.66 | 0.71 | 0.59 | 0.43 | <0.001 |
| Tobu-Utsunomiya station    | Tochigi   | 0.84 | 0.61 | 0.52 | 0.68 | 0.63 | 0.49 | <0.001 |
| Chuo Maebashi Station      | Gunma     | 1.39 | 0.34 | 0.51 | 0.62 | 0.48 | 0.92 | <0.001 |
| Shibuya Station            | Tokyo     | 0.24 | 0.42 | 0.46 | 0.52 | 0.45 | 0.32 | <0.001 |
| Shibuya Center Street      | Tokyo     | 0.22 | 0.38 | 0.42 | 0.48 | 0.40 | 0.29 | <0.001 |
| Harajuku Station           | Tokyo     | 0.34 | 0.58 | 0.60 | 0.68 | 0.65 | 0.47 | <0.001 |
| Shinjuku Kabukicho         | Tokyo     | 0.27 | 0.42 | 0.45 | 0.48 | 0.42 | 0.25 | <0.001 |
| Ikebukuro Station          | Tokyo     | 0.44 | 0.53 | 0.59 | 0.63 | 0.55 | 0.38 | <0.001 |
| Tokyo Station              | Tokyo     | 0.30 | 0.40 | 0.43 | 0.44 | 0.38 | 0.22 | <0.001 |
| Shinbashi Station          | Tokyo     | 0.34 | 0.37 | 0.43 | 0.43 | 0.41 | 0.24 | <0.001 |
| Shinagawa Station          | Tokyo     | 0.42 | 0.38 | 0.42 | 0.42 | 0.41 | 0.33 | <0.001 |
| Ueno Station               | Tokyo     | 0.43 | 0.57 | 0.61 | 0.62 | 0.51 | 0.32 | <0.001 |
| Ginza Station              | Tokyo     | 0.27 | 0.31 | 0.37 | 0.36 | 0.29 | 0.20 | <0.001 |
| Roppongi Station           | Tokyo     | 0.44 | 0.50 | 0.57 | 0.58 | 0.53 | 0.37 | <0.001 |
| Kichijoji Station          | Tokyo     | 0.46 | 0.58 | 0.60 | 0.65 | 0.59 | 0.43 | <0.001 |
| Motomachi-Chukagai Station | Kanagawa  | 0.89 | 0.74 | 0.83 | 0.83 | 0.79 | 0.66 | <0.001 |
| Sakuragicho Station        | Kanagawa  | 0.50 | 0.62 | 0.68 | 0.67 | 0.59 | 0.39 | <0.001 |
| Kannai Station             | Kanagawa  | 0.81 | 0.74 | 0.76 | 0.88 | 0.78 | 0.51 | <0.001 |
| Hamamatsu Station          | Shizuoka  | 0.46 | 0.60 | 0.64 | 0.61 | 0.57 | 0.52 | <0.001 |
| Sakae Station              | Aichi     | 0.38 | 0.56 | 0.55 | 0.58 | 0.48 | 0.35 | <0.001 |
| Fushimi Station            | Aichi     | 0.60 | 0.58 | 0.70 | 0.69 | 0.54 | 0.31 | <0.001 |
| Kawaramachi Station        | Kyoto     | 0.29 | 0.44 | 0.51 | 0.51 | 0.40 | 0.30 | <0.001 |
| Shinsaibashi Station       | Osaka     | 0.43 | 0.49 | 0.61 | 0.62 | 0.56 | 0.37 | <0.001 |
| Namba Station              | Osaka     | 0.27 | 0.40 | 0.43 | 0.44 | 0.37 | 0.25 | <0.001 |
| Kitashinchi Station        | Osaka     | 0.38 | 0.46 | 0.50 | 0.52 | 0.44 | 0.30 | <0.001 |
| Tamachi Station            | Okayama   | 0.70 | 0.80 | 0.82 | 0.79 | 0.71 | 0.56 | <0.001 |
| Hatchobori Station         | Hiroshima | 0.39 | 0.44 | 0.52 | 0.52 | 0.45 | 0.33 | <0.001 |

|                         |          |      |      |      |      |      |      |        |
|-------------------------|----------|------|------|------|------|------|------|--------|
| Kawaramachi Station     | Kagawa   | 0.61 | 0.71 | 0.80 | 0.94 | 0.76 | 0.71 | <0.001 |
| Hakata Station          | Fukuoka  | 0.31 | 0.38 | 0.42 | 0.41 | 0.42 | 0.27 | <0.001 |
| Nakasu-kawabata Station | Fukuoka  | 0.50 | 0.59 | 0.57 | 0.61 | 0.50 | 0.42 | <0.001 |
| Kanko-dori Station      | Nagasaki | 0.59 | 0.67 | 0.72 | 0.75 | 0.66 | 0.52 | <0.001 |
| Makishi Station         | Okinawa  | 1.17 | 0.84 | 0.89 | 0.85 | 0.92 | 0.80 | <0.001 |

20:00–23:59 PM

|                            |           |      |      |      |      |      |      |        |
|----------------------------|-----------|------|------|------|------|------|------|--------|
| Susukino Station           | Hokkaido  | 0.27 | 0.22 | 0.25 | 0.24 | 0.17 | 0.22 | <0.001 |
| Odori Station              | Hokkaido  | 0.36 | 0.50 | 0.47 | 0.43 | 0.32 | 0.35 | <0.001 |
| Central Hirosaki Station   | Aomori    | 0.15 | 0.60 | 0.47 | 0.46 | 0.46 | 0.72 | <0.001 |
| Kotodai-Koen Station       | Miyagi    | 0.37 | 0.45 | 0.59 | 0.55 | 0.37 | 0.45 | <0.001 |
| Tobu-Utsunomiya Station    | Tochigi   | 0.67 | 0.46 | 0.41 | 0.55 | 0.52 | 0.47 | <0.001 |
| Chuo Maebashi Station      | Gunma     | 1.27 | 0.37 | 0.42 | 0.48 | 0.39 | 0.64 | <0.001 |
| Shibuya Station            | Tokyo     | 0.16 | 0.33 | 0.35 | 0.36 | 0.27 | 0.24 | <0.001 |
| Shibuya Center Street      | Tokyo     | 0.15 | 0.28 | 0.31 | 0.32 | 0.24 | 0.22 | <0.001 |
| Harajuku Station           | Tokyo     | 0.24 | 0.41 | 0.50 | 0.45 | 0.41 | 0.35 | <0.001 |
| Shinjuku Kabukicho         | Tokyo     | 0.16 | 0.30 | 0.33 | 0.34 | 0.27 | 0.24 | <0.001 |
| Ikebukuro Station          | Tokyo     | 0.28 | 0.42 | 0.45 | 0.44 | 0.34 | 0.25 | <0.001 |
| Tokyo Station              | Tokyo     | 0.23 | 0.34 | 0.37 | 0.34 | 0.25 | 0.17 | <0.001 |
| Shinbashi Station          | Tokyo     | 0.22 | 0.26 | 0.32 | 0.28 | 0.22 | 0.16 | <0.001 |
| Shinagawa Station          | Tokyo     | 0.26 | 0.30 | 0.35 | 0.32 | 0.29 | 0.23 | <0.001 |
| Ueno Station               | Tokyo     | 0.37 | 0.41 | 0.45 | 0.43 | 0.28 | 0.27 | <0.001 |
| Ginza Station              | Tokyo     | 0.20 | 0.22 | 0.27 | 0.24 | 0.17 | 0.12 | <0.001 |
| Roppongi Station           | Tokyo     | 0.32 | 0.37 | 0.44 | 0.41 | 0.34 | 0.27 | <0.001 |
| Kichijoji Station          | Tokyo     | 0.32 | 0.39 | 0.48 | 0.43 | 0.39 | 0.39 | <0.001 |
| Motomachi-Chukagai Station | Kanagawa  | 0.62 | 0.67 | 0.61 | 0.66 | 0.75 | 0.62 | <0.001 |
| Sakuragicho Station        | Kanagawa  | 0.39 | 0.48 | 0.54 | 0.45 | 0.40 | 0.28 | <0.001 |
| Kannai Station             | Kanagawa  | 0.54 | 0.63 | 0.59 | 0.59 | 0.43 | 0.36 | <0.001 |
| Hamamatsu Station          | Shizuoka  | 0.28 | 0.52 | 0.50 | 0.43 | 0.44 | 0.65 | <0.001 |
| Sakae Station              | Aichi     | 0.24 | 0.32 | 0.38 | 0.36 | 0.32 | 0.20 | <0.001 |
| Fushimi Station            | Aichi     | 0.38 | 0.44 | 0.47 | 0.50 | 0.39 | 0.19 | <0.001 |
| Kawaramachi Station        | Kyoto     | 0.20 | 0.31 | 0.35 | 0.38 | 0.29 | 0.21 | <0.001 |
| Shinsaibashi Station       | Osaka     | 0.33 | 0.34 | 0.39 | 0.37 | 0.30 | 0.29 | <0.001 |
| Namba Station              | Osaka     | 0.17 | 0.27 | 0.30 | 0.28 | 0.24 | 0.16 | <0.001 |
| Kitashinchi Station        | Osaka     | 0.20 | 0.24 | 0.27 | 0.26 | 0.20 | 0.16 | <0.001 |
| Tamachi Station            | Okayama   | 0.52 | 0.50 | 0.59 | 0.51 | 0.46 | 0.52 | <0.01  |
| Hatchobori Station         | Hiroshima | 0.25 | 0.24 | 0.27 | 0.27 | 0.22 | 0.18 | <0.001 |
| Kawaramachi Station        | Kagawa    | 0.36 | 0.68 | 0.80 | 0.87 | 0.69 | 0.86 | <0.001 |
| Hakata Station             | Fukuoka   | 0.18 | 0.25 | 0.30 | 0.24 | 0.27 | 0.22 | <0.001 |
| Nakasu-kawabata Station    | Fukuoka   | 0.33 | 0.27 | 0.29 | 0.30 | 0.26 | 0.31 | <0.001 |
| Kanko-dori Station         | Nagasaki  | 0.46 | 0.39 | 0.47 | 0.52 | 0.50 | 0.26 | <0.001 |
| Makishi Station            | Okinawa   | 0.96 | 0.62 | 0.87 | 0.69 | 0.78 | 0.71 | <0.001 |

Second

0:00–7:59 AM

|                          |          |      |      |      |      |      |      |        |
|--------------------------|----------|------|------|------|------|------|------|--------|
| Susukino Station         | Hokkaido | –    | –    | –    | –    | –    | –    | –      |
| Odori Station            | Hokkaido | –    | –    | –    | –    | –    | –    | –      |
| Central Hirosaki Station | Aomori   | –    | –    | –    | –    | –    | –    | –      |
| Kotodai-Koen Station     | Miyagi   | –    | –    | –    | –    | –    | –    | –      |
| Tobu-Utsunomiya station  | Tochigi  | 0.25 | 0.39 | 0.57 | 0.61 | 0.56 | 0.40 | <0.001 |
| Chuo Maebashi Station    | Gunma    | –    | –    | –    | –    | –    | –    | –      |

|                            |           |      |      |      |      |      |      |        |
|----------------------------|-----------|------|------|------|------|------|------|--------|
| Shibuya Station            | Tokyo     | 0.44 | 0.29 | 0.36 | 0.36 | 0.38 | 0.52 | <0.001 |
| Shibuya Center Street      | Tokyo     | 0.41 | 0.26 | 0.32 | 0.32 | 0.34 | 0.47 | <0.001 |
| Harajuku Station           | Tokyo     | 0.63 | 0.44 | 0.55 | 0.48 | 0.48 | 0.79 | <0.001 |
| Shinjuku Kabukicho         | Tokyo     | 0.47 | 0.39 | 0.40 | 0.46 | 0.41 | 0.56 | <0.001 |
| Ikebukuro Station          | Tokyo     | 0.53 | 0.40 | 0.44 | 0.47 | 0.41 | 0.49 | <0.001 |
| Tokyo Station              | Tokyo     | 0.50 | 0.48 | 0.47 | 0.50 | 0.43 | 0.42 | <0.001 |
| Shinbashi Station          | Tokyo     | 0.48 | 0.46 | 0.43 | 0.48 | 0.43 | 0.51 | <0.001 |
| Shinagawa Station          | Tokyo     | 0.52 | 0.50 | 0.53 | 0.59 | 0.53 | 0.42 | <0.001 |
| Ueno Station               | Tokyo     | 0.71 | 0.51 | 0.58 | 0.56 | 0.44 | 0.41 | <0.001 |
| Ginza Station              | Tokyo     | 0.50 | 0.52 | 0.51 | 0.58 | 0.46 | 0.40 | <0.001 |
| Roppongi Station           | Tokyo     | 0.45 | 0.52 | 0.47 | 0.47 | 0.46 | 0.67 | <0.001 |
| Kichijoji Station          | Tokyo     | 0.64 | 0.44 | 0.67 | 0.56 | 0.53 | 0.62 | <0.001 |
| Motomachi-Chukagai Station | Kanagawa  | 0.51 | 0.51 | 0.51 | 0.75 | 0.68 | 0.54 | <0.001 |
| Sakuragicho Station        | Kanagawa  | 0.56 | 0.56 | 0.61 | 0.64 | 0.60 | 0.58 | <0.001 |
| Kannai Station             | Kanagawa  | 0.81 | 0.62 | 0.63 | 0.60 | 0.60 | 1.04 | <0.001 |
| Hamamatsu Station          | Shizuoka  | -    | -    | -    | -    | -    | -    | -      |
| Sakae Station              | Aichi     | 0.51 | 0.40 | 0.40 | 0.37 | 0.35 | 0.35 | <0.001 |
| Fushimi Station            | Aichi     | 0.58 | 0.52 | 0.50 | 0.54 | 0.49 | 0.39 | <0.001 |
| Kawaramachi Station        | Kyoto     | 0.38 | 0.22 | 0.32 | 0.37 | 0.37 | 0.68 | <0.001 |
| Shinsaibashi Station       | Osaka     | 0.49 | 0.37 | 0.44 | 0.49 | 0.44 | 0.49 | <0.001 |
| Namba Station              | Osaka     | 0.47 | 0.30 | 0.39 | 0.44 | 0.36 | 0.52 | <0.001 |
| Kitashinchi Station        | Osaka     | 0.36 | 0.34 | 0.39 | 0.44 | 0.38 | 0.43 | <0.001 |
| Tamachi Station            | Okayama   | -    | -    | -    | -    | -    | -    | -      |
| Hatchobori Station         | Hiroshima | -    | -    | -    | -    | -    | -    | -      |
| Kawaramachi Station        | Kagawa    | -    | -    | -    | -    | -    | -    | -      |
| Hakata Station             | Fukuoka   | 0.41 | 0.43 | 0.56 | 0.46 | 0.41 | 0.42 | <0.001 |
| Nakasu-kawabata Station    | Fukuoka   | 0.31 | 0.42 | 0.51 | 0.53 | 0.53 | 0.56 | <0.001 |
| Kanko-dori Station         | Nagasaki  | -    | -    | -    | -    | -    | -    | -      |
| Makishi Station            | Okinawa   | -    | -    | -    | -    | -    | -    | -      |

08:00-11:59 AM

|                            |          |      |      |      |      |      |      |        |
|----------------------------|----------|------|------|------|------|------|------|--------|
| Susukino Station           | Hokkaido | -    | -    | -    | -    | -    | -    | -      |
| Odori Station              | Hokkaido | -    | -    | -    | -    | -    | -    | -      |
| Central Hirosaki Station   | Aomori   | -    | -    | -    | -    | -    | -    | -      |
| Kotodai-Koen Station       | Miyagi   | -    | -    | -    | -    | -    | -    | -      |
| Tobu-Utsunomiya station    | Tochigi  | 0.88 | 0.92 | 0.83 | 0.88 | 0.76 | 0.51 | <0.001 |
| Chuo Maebashi Station      | Gunma    | -    | -    | -    | -    | -    | -    | -      |
| Shibuya Station            | Tokyo    | 0.96 | 0.61 | 0.57 | 0.56 | 0.46 | 0.50 | <0.001 |
| Shibuya Center Street      | Tokyo    | 0.91 | 0.57 | 0.52 | 0.51 | 0.42 | 0.45 | <0.001 |
| Harajuku Station           | Tokyo    | 1.01 | 0.76 | 0.69 | 0.64 | 0.51 | 0.66 | <0.001 |
| Shinjuku Kabukicho         | Tokyo    | 0.92 | 0.63 | 0.61 | 0.59 | 0.47 | 0.49 | <0.001 |
| Ikebukuro Station          | Tokyo    | 1.00 | 0.64 | 0.63 | 0.62 | 0.49 | 0.52 | <0.001 |
| Tokyo Station              | Tokyo    | 0.95 | 0.77 | 0.72 | 0.70 | 0.51 | 0.46 | <0.001 |
| Shinbashi Station          | Tokyo    | 0.91 | 0.68 | 0.65 | 0.66 | 0.54 | 0.60 | <0.001 |
| Shinagawa Station          | Tokyo    | 0.80 | 0.65 | 0.59 | 0.59 | 0.49 | 0.49 | <0.001 |
| Ueno Station               | Tokyo    | 0.87 | 0.61 | 0.59 | 0.56 | 0.43 | 0.36 | <0.001 |
| Ginza Station              | Tokyo    | 1.43 | 0.95 | 0.95 | 0.87 | 0.69 | 0.59 | <0.001 |
| Roppongi Station           | Tokyo    | 0.98 | 0.84 | 0.80 | 0.88 | 0.70 | 0.77 | <0.001 |
| Kichijoji Station          | Tokyo    | 1.23 | 0.74 | 0.79 | 0.72 | 0.61 | 0.62 | <0.001 |
| Motomachi-Chukagai Station | Kanagawa | 0.86 | 0.82 | 0.86 | 1.01 | 0.78 | 0.64 | <0.001 |

|                         |           |      |      |      |      |      |      |        |
|-------------------------|-----------|------|------|------|------|------|------|--------|
| Sakuragicho Station     | Kanagawa  | 1.26 | 0.95 | 0.93 | 0.95 | 0.79 | 0.68 | <0.001 |
| Kannai Station          | Kanagawa  | 1.27 | 0.89 | 0.88 | 0.95 | 0.85 | 0.85 | <0.001 |
| Hamamatsu Station       | Shizuoka  | -    | -    | -    | -    | -    | -    | -      |
| Sakae Station           | Aichi     | 0.90 | 0.77 | 0.75 | 0.71 | 0.56 | 0.50 | <0.001 |
| Fushimi Station         | Aichi     | 1.05 | 0.89 | 0.87 | 0.89 | 0.66 | 0.61 | <0.001 |
| Kawaramachi Station     | Kyoto     | 1.05 | 0.65 | 0.64 | 0.63 | 0.50 | 0.48 | <0.001 |
| Shinsaibashi Station    | Osaka     | 1.33 | 1.05 | 1.08 | 1.07 | 0.79 | 0.88 | <0.001 |
| Namba Station           | Osaka     | 0.87 | 0.67 | 0.63 | 0.64 | 0.47 | 0.48 | <0.001 |
| Kitashinchi Station     | Osaka     | 1.30 | 0.89 | 0.89 | 0.86 | 0.71 | 0.76 | <0.001 |
| Tamachi Station         | Okayama   | -    | -    | -    | -    | -    | -    | -      |
| Hatchobori Station      | Hiroshima | -    | -    | -    | -    | -    | -    | -      |
| Kawaramachi Station     | Kagawa    | -    | -    | -    | -    | -    | -    | -      |
| Hakata Station          | Fukuoka   | 0.78 | 0.69 | 0.71 | 0.64 | 0.53 | 0.50 | <0.001 |
| Nakasu-kawabata Station | Fukuoka   | 0.90 | 1.04 | 1.08 | 1.10 | 0.92 | 0.79 | <0.001 |
| Kanko-dori Station      | Nagasaki  | -    | -    | -    | -    | -    | -    | -      |
| Makishi Station         | Okinawa   | -    | -    | -    | -    | -    | -    | -      |

12:00-15:59 PM

|                            |           |      |      |      |      |      |      |        |
|----------------------------|-----------|------|------|------|------|------|------|--------|
| Susukino Station           | Hokkaido  | -    | -    | -    | -    | -    | -    | -      |
| Odori Station              | Hokkaido  | -    | -    | -    | -    | -    | -    | -      |
| Central Hirosaki Station   | Aomori    | -    | -    | -    | -    | -    | -    | -      |
| Kotodai-Koen Station       | Miyagi    | -    | -    | -    | -    | -    | -    | -      |
| Tobu-Utsunomiya station    | Tochigi   | 1.21 | 0.63 | 0.75 | 0.76 | 0.61 | 0.46 | <0.001 |
| Chuo Maebashi Station      | Gunma     | -    | -    | -    | -    | -    | -    | -      |
| Shibuya Station            | Tokyo     | 1.08 | 0.63 | 0.57 | 0.54 | 0.41 | 0.46 | <0.001 |
| Shibuya Center Street      | Tokyo     | 1.02 | 0.59 | 0.52 | 0.49 | 0.37 | 0.42 | <0.001 |
| Harajuku Station           | Tokyo     | 1.41 | 0.83 | 0.71 | 0.67 | 0.49 | 0.68 | <0.001 |
| Shinjuku Kabukicho         | Tokyo     | 0.90 | 0.65 | 0.59 | 0.58 | 0.45 | 0.41 | <0.001 |
| Ikebukuro Station          | Tokyo     | 1.04 | 0.64 | 0.65 | 0.64 | 0.50 | 0.47 | <0.001 |
| Tokyo Station              | Tokyo     | 1.15 | 0.85 | 0.84 | 0.82 | 0.56 | 0.44 | <0.001 |
| Shinbashi Station          | Tokyo     | 1.04 | 0.76 | 0.73 | 0.75 | 0.61 | 0.58 | <0.001 |
| Shinagawa Station          | Tokyo     | 0.88 | 0.70 | 0.69 | 0.68 | 0.54 | 0.46 | <0.001 |
| Ueno Station               | Tokyo     | 0.94 | 0.70 | 0.66 | 0.64 | 0.45 | 0.35 | <0.001 |
| Ginza Station              | Tokyo     | 1.71 | 1.02 | 1.01 | 0.91 | 0.65 | 0.53 | <0.001 |
| Roppongi Station           | Tokyo     | 1.09 | 0.87 | 0.87 | 0.87 | 0.69 | 0.77 | <0.001 |
| Kichijoji Station          | Tokyo     | 1.24 | 0.76 | 0.76 | 0.73 | 0.59 | 0.56 | <0.001 |
| Motomachi-Chukagai Station | Kanagawa  | 0.94 | 0.80 | 0.91 | 0.94 | 0.73 | 0.62 | <0.001 |
| Sakuragicho Station        | Kanagawa  | 1.40 | 1.04 | 0.97 | 1.00 | 0.78 | 0.63 | <0.001 |
| Kannai Station             | Kanagawa  | 1.34 | 0.84 | 0.85 | 0.92 | 0.83 | 0.74 | <0.001 |
| Hamamatsu Station          | Shizuoka  | -    | -    | -    | -    | -    | -    | -      |
| Sakae Station              | Aichi     | 1.02 | 0.75 | 0.75 | 0.74 | 0.54 | 0.44 | <0.001 |
| Fushimi Station            | Aichi     | 1.18 | 0.83 | 0.88 | 0.87 | 0.66 | 0.58 | <0.001 |
| Kawaramachi Station        | Kyoto     | 0.94 | 0.57 | 0.56 | 0.56 | 0.42 | 0.39 | <0.001 |
| Shinsaibashi Station       | Osaka     | 1.18 | 1.02 | 1.05 | 1.02 | 0.72 | 0.72 | <0.001 |
| Namba Station              | Osaka     | 0.80 | 0.59 | 0.58 | 0.56 | 0.43 | 0.43 | <0.001 |
| Kitashinchi Station        | Osaka     | 1.38 | 0.97 | 0.95 | 0.97 | 0.76 | 0.68 | <0.001 |
| Tamachi Station            | Okayama   | -    | -    | -    | -    | -    | -    | -      |
| Hatchobori Station         | Hiroshima | -    | -    | -    | -    | -    | -    | -      |
| Kawaramachi Station        | Kagawa    | -    | -    | -    | -    | -    | -    | -      |
| Hakata Station             | Fukuoka   | 0.75 | 0.68 | 0.76 | 0.66 | 0.56 | 0.50 | <0.001 |

|                         |          |      |      |      |      |      |      |        |
|-------------------------|----------|------|------|------|------|------|------|--------|
| Nakasu-kawabata Station | Fukuoka  | 0.94 | 1.02 | 1.12 | 1.18 | 0.95 | 0.74 | <0.001 |
| Kanko-dori Station      | Nagasaki | -    | -    | -    | -    | -    | -    | -      |
| Makishi Station         | Okinawa  | -    | -    | -    | -    | -    | -    | -      |

16:00-19:59 PM

|                            |           |      |      |      |      |      |      |        |
|----------------------------|-----------|------|------|------|------|------|------|--------|
| Susukino Station           | Hokkaido  | -    | -    | -    | -    | -    | -    | -      |
| Odori Station              | Hokkaido  | -    | -    | -    | -    | -    | -    | -      |
| Central Hirosaki Station   | Aomori    | -    | -    | -    | -    | -    | -    | -      |
| Kotodai-Koen Station       | Miyagi    | -    | -    | -    | -    | -    | -    | -      |
| Tobu-Utsunomiya station    | Tochigi   | 0.60 | 0.56 | 0.61 | 0.65 | 0.53 | 0.45 | <0.001 |
| Chuo Maebashi Station      | Gunma     | -    | -    | -    | -    | -    | -    | -      |
| Shibuya Station            | Tokyo     | 0.89 | 0.52 | 0.49 | 0.48 | 0.36 | 0.46 | <0.001 |
| Shibuya Center Street      | Tokyo     | 0.82 | 0.47 | 0.43 | 0.42 | 0.32 | 0.42 | <0.001 |
| Harajuku Station           | Tokyo     | 1.07 | 0.67 | 0.59 | 0.56 | 0.46 | 0.69 | <0.001 |
| Shinjuku Kabukicho         | Tokyo     | 0.74 | 0.55 | 0.53 | 0.54 | 0.40 | 0.41 | <0.001 |
| Ikebukuro Station          | Tokyo     | 0.87 | 0.57 | 0.58 | 0.57 | 0.43 | 0.47 | <0.001 |
| Tokyo Station              | Tokyo     | 0.90 | 0.68 | 0.65 | 0.64 | 0.45 | 0.39 | <0.001 |
| Shinbashi Station          | Tokyo     | 0.89 | 0.67 | 0.64 | 0.67 | 0.49 | 0.45 | <0.001 |
| Shinagawa Station          | Tokyo     | 0.70 | 0.58 | 0.58 | 0.59 | 0.47 | 0.44 | <0.001 |
| Ueno Station               | Tokyo     | 0.77 | 0.61 | 0.60 | 0.59 | 0.43 | 0.36 | <0.001 |
| Ginza Station              | Tokyo     | 1.20 | 0.82 | 0.79 | 0.74 | 0.53 | 0.41 | <0.001 |
| Roppongi Station           | Tokyo     | 1.02 | 0.82 | 0.77 | 0.79 | 0.62 | 0.57 | <0.001 |
| Kichijoji Station          | Tokyo     | 0.96 | 0.63 | 0.60 | 0.58 | 0.44 | 0.44 | <0.001 |
| Motomachi-Chukagai Station | Kanagawa  | 0.90 | 0.67 | 0.70 | 0.80 | 0.59 | 0.55 | <0.001 |
| Sakuragicho Station        | Kanagawa  | 1.05 | 0.76 | 0.75 | 0.77 | 0.58 | 0.54 | <0.001 |
| Kannai Station             | Kanagawa  | 1.05 | 0.78 | 0.81 | 0.85 | 0.69 | 0.62 | <0.001 |
| Hamamatsu Station          | Shizuoka  | -    | -    | -    | -    | -    | -    | -      |
| Sakae Station              | Aichi     | 0.76 | 0.64 | 0.60 | 0.58 | 0.42 | 0.40 | <0.001 |
| Fushimi Station            | Aichi     | 0.96 | 0.69 | 0.72 | 0.68 | 0.45 | 0.46 | <0.001 |
| Kawaramachi Station        | Kyoto     | 0.70 | 0.42 | 0.48 | 0.47 | 0.35 | 0.39 | <0.001 |
| Shinsaibashi Station       | Osaka     | 0.93 | 0.81 | 0.85 | 0.83 | 0.60 | 0.59 | <0.001 |
| Namba Station              | Osaka     | 0.68 | 0.55 | 0.54 | 0.55 | 0.40 | 0.41 | <0.001 |
| Kitashinchi Station        | Osaka     | 0.99 | 0.73 | 0.74 | 0.75 | 0.55 | 0.56 | <0.001 |
| Tamachi Station            | Okayama   | -    | -    | -    | -    | -    | -    | -      |
| Hatchobori Station         | Hiroshima | -    | -    | -    | -    | -    | -    | -      |
| Kawaramachi Station        | Kagawa    | -    | -    | -    | -    | -    | -    | -      |
| Hakata Station             | Fukuoka   | 0.61 | 0.59 | 0.62 | 0.55 | 0.43 | 0.45 | <0.001 |
| Nakasu-kawabata Station    | Fukuoka   | 0.72 | 0.84 | 0.85 | 0.85 | 0.61 | 0.62 | <0.001 |
| Kanko-dori Station         | Nagasaki  | -    | -    | -    | -    | -    | -    | -      |
| Makishi Station            | Okinawa   | -    | -    | -    | -    | -    | -    | -      |

20:00-23:59 PM

|                          |          |      |      |      |      |      |      |        |
|--------------------------|----------|------|------|------|------|------|------|--------|
| Susukino Station         | Hokkaido | -    | -    | -    | -    | -    | -    | -      |
| Odori Station            | Hokkaido | -    | -    | -    | -    | -    | -    | -      |
| Central Hirosaki Station | Aomori   | -    | -    | -    | -    | -    | -    | -      |
| Kotodai-Koen Station     | Miyagi   | -    | -    | -    | -    | -    | -    | -      |
| Tobu-Utsunomiya station  | Tochigi  | 0.28 | 0.31 | 0.38 | 0.41 | 0.28 | 0.30 | <0.001 |
| Chuo Maebashi Station    | Gunma    | -    | -    | -    | -    | -    | -    | -      |
| Shibuya Station          | Tokyo    | 0.47 | 0.30 | 0.30 | 0.26 | 0.20 | 0.35 | <0.001 |
| Shibuya Center Street    | Tokyo    | 0.44 | 0.27 | 0.27 | 0.24 | 0.17 | 0.32 | <0.001 |
| Harajuku Station         | Tokyo    | 0.64 | 0.44 | 0.43 | 0.35 | 0.28 | 0.57 | <0.001 |

|                            |           |      |      |      |      |      |      |        |
|----------------------------|-----------|------|------|------|------|------|------|--------|
| Shinjuku Kabukicho         | Tokyo     | 0.42 | 0.30 | 0.31 | 0.30 | 0.21 | 0.32 | <0.001 |
| Ikebukuro Station          | Tokyo     | 0.47 | 0.31 | 0.31 | 0.28 | 0.21 | 0.30 | <0.001 |
| Tokyo Station              | Tokyo     | 0.49 | 0.38 | 0.37 | 0.32 | 0.19 | 0.26 | <0.001 |
| Shinbashi Station          | Tokyo     | 0.52 | 0.38 | 0.36 | 0.32 | 0.21 | 0.28 | <0.001 |
| Shinagawa Station          | Tokyo     | 0.44 | 0.39 | 0.38 | 0.35 | 0.26 | 0.32 | <0.001 |
| Ueno Station               | Tokyo     | 0.50 | 0.37 | 0.37 | 0.33 | 0.20 | 0.25 | <0.001 |
| Ginza Station              | Tokyo     | 0.55 | 0.38 | 0.35 | 0.31 | 0.19 | 0.22 | <0.001 |
| Roppongi Station           | Tokyo     | 0.58 | 0.50 | 0.41 | 0.41 | 0.29 | 0.39 | <0.001 |
| Kichijoji Station          | Tokyo     | 0.46 | 0.33 | 0.36 | 0.30 | 0.22 | 0.36 | <0.001 |
| Motomachi-Chukagai Station | Kanagawa  | 0.44 | 0.39 | 0.38 | 0.54 | 0.44 | 0.43 | <0.001 |
| Sakuragicho Station        | Kanagawa  | 0.57 | 0.41 | 0.41 | 0.38 | 0.32 | 0.37 | <0.001 |
| Kannai Station             | Kanagawa  | 0.55 | 0.45 | 0.46 | 0.39 | 0.28 | 0.38 | <0.001 |
| Hamamatsu Station          | Shizuoka  | -    | -    | -    | -    | -    | -    | -      |
| Sakae Station              | Aichi     | 0.38 | 0.33 | 0.32 | 0.26 | 0.18 | 0.20 | <0.001 |
| Fushimi Station            | Aichi     | 0.51 | 0.34 | 0.34 | 0.29 | 0.20 | 0.23 | <0.001 |
| Kawaramachi Station        | Kyoto     | 0.34 | 0.19 | 0.22 | 0.23 | 0.17 | 0.27 | <0.001 |
| Shinsaibashi Station       | Osaka     | 0.47 | 0.35 | 0.39 | 0.33 | 0.24 | 0.33 | <0.001 |
| Namba Station              | Osaka     | 0.36 | 0.27 | 0.28 | 0.26 | 0.18 | 0.29 | <0.001 |
| Kitashinchi Station        | Osaka     | 0.40 | 0.32 | 0.31 | 0.27 | 0.20 | 0.23 | <0.001 |
| Tamachi Station            | Okayama   | -    | -    | -    | -    | -    | -    | -      |
| Hatchobori Station         | Hiroshima | -    | -    | -    | -    | -    | -    | -      |
| Kawaramachi Station        | Kagawa    | -    | -    | -    | -    | -    | -    | -      |
| Hakata Station             | Fukuoka   | 0.28 | 0.30 | 0.33 | 0.26 | 0.22 | 0.26 | <0.001 |
| Nakasu-kawabata Station    | Fukuoka   | 0.32 | 0.34 | 0.34 | 0.30 | 0.23 | 0.31 | <0.001 |
| Kanko-dori Station         | Nagasaki  | -    | -    | -    | -    | -    | -    | -      |
| Makishi Station            | Okinawa   | -    | -    | -    | -    | -    | -    | -      |

**Table S4: P-values for testing zero cross-correlation across all maximum +10-day lags between human mobility and daily number of newly reported COVID-19 cases during the declaration of a state of emergency, using the Haugh-Box test, by age groups and time frames, and by the first and second declaration.** The ratios of the rolling seven-day daily average of the total population to a baseline on January 16, 2020, was compared with daily number of newly reported COVID-19 cases during the declaration of a state of emergency.

| Declaration   | Time frame     | Area                       | Prefecture | Age group |        |        |        |        |        |
|---------------|----------------|----------------------------|------------|-----------|--------|--------|--------|--------|--------|
|               |                |                            |            | 20s       | 30s    | 40s    | 50s    | 60s    | ≥ 70s  |
| First         | 0:00–7:59 AM   | Central Hirosaki Station   | Aomori     | 0.84      | 0.12   | 0.42   | 0.16   | 0.42   | 0.08   |
|               |                | Chuo Maebashi Station      | Gunma      | 0.66      | <0.001 | 0.12   | <0.001 | <0.001 | 0.08   |
|               |                | Fushimi Station            | Aichi      | <0.001    | <0.001 | <0.001 | <0.001 | <0.001 | <0.001 |
|               |                | Ginza Station              | Tokyo      | <0.001    | <0.001 | <0.001 | <0.001 | <0.001 | <0.001 |
|               |                | Hakata Station             | Fukuoka    | <0.001    | <0.001 | <0.001 | <0.001 | <0.001 | <0.001 |
|               |                | Hamamatsu Station          | Shizuoka   | <0.001    | <0.01  | 0.10   | <0.001 | <0.001 | 1.00   |
|               |                | Harajuku Station           | Tokyo      | <0.001    | <0.001 | <0.01  | <0.05  | <0.001 | <0.001 |
|               |                | Hatchobori Station         | Hiroshima  | <0.05     | <0.001 | <0.05  | <0.001 | <0.01  | <0.01  |
|               |                | Ikebukuro Station          | Tokyo      | <0.001    | <0.001 | <0.001 | <0.001 | <0.001 | <0.001 |
|               |                | Kanko-dori Station         | Nagasaki   | 0.99      | 0.79   | 0.96   | 0.96   | 0.96   | 0.89   |
|               |                | Kannai Station             | Kanagawa   | <0.001    | <0.001 | <0.001 | 0.14   | <0.001 | <0.001 |
|               |                | Kawaramachi Station        | Kagawa     | 0.78      | 0.92   | 1.00   | 0.99   | 0.98   | <0.01  |
|               |                | Kawaramachi Station        | Kyoto      | 0.31      | 0.19   | <0.001 | <0.001 | <0.001 | 0.41   |
|               |                | Kichijoji Station          | Tokyo      | 0.69      | <0.001 | <0.001 | <0.001 | <0.001 | 0.06   |
|               |                | Kitashinchi Station        | Osaka      | <0.001    | <0.001 | <0.001 | <0.001 | <0.001 | <0.001 |
|               |                | Kotodai-Koen Station       | Miyagi     | 0.77      | 0.86   | 0.59   | 0.59   | 0.73   | 0.90   |
|               |                | Makishi Station            | Okinawa    | <0.001    | <0.001 | <0.001 | <0.001 | <0.001 | <0.001 |
|               |                | Motomachi-Chukagai Station | Kanagawa   | <0.001    | <0.001 | <0.001 | <0.001 | <0.001 | <0.001 |
|               |                | Nakasu-kawabata Station    | Fukuoka    | <0.001    | <0.001 | <0.001 | <0.001 | <0.001 | <0.001 |
|               |                | Namba Station              | Osaka      | <0.001    | <0.001 | <0.001 | <0.001 | <0.001 | <0.001 |
|               |                | Odori Station              | Hokkaido   | <0.001    | <0.001 | <0.01  | <0.001 | <0.001 | <0.001 |
|               |                | Roppongi Station           | Tokyo      | 1.00      | <0.001 | <0.001 | <0.001 | <0.001 | 1.00   |
|               |                | Sakae Station              | Aichi      | <0.001    | <0.001 | <0.001 | <0.001 | <0.001 | <0.001 |
|               |                | Sakuragicho Station        | Kanagawa   | <0.001    | <0.001 | <0.01  | <0.001 | <0.01  | 0.42   |
|               |                | Shibuya Center Street      | Tokyo      | <0.001    | <0.001 | <0.001 | <0.001 | <0.001 | <0.001 |
|               |                | Shibuya Station            | Tokyo      | <0.001    | <0.001 | <0.001 | <0.001 | <0.001 | <0.001 |
|               |                | Shinagawa Station          | Tokyo      | <0.001    | <0.001 | <0.001 | <0.001 | <0.001 | <0.001 |
|               |                | Shinbashi Station          | Tokyo      | 0.12      | <0.001 | <0.001 | <0.001 | <0.001 | <0.001 |
|               |                | Shinjuku Kabukicho         | Tokyo      | <0.01     | <0.001 | <0.001 | <0.001 | <0.001 | <0.001 |
|               |                | Shinsaibashi Station       | Osaka      | <0.001    | <0.001 | <0.001 | <0.001 | <0.001 | 0.63   |
|               |                | Susukino Station           | Hokkaido   | <0.001    | <0.001 | <0.001 | <0.001 | <0.001 | <0.001 |
|               |                | Tamachi Station            | Okayama    | 0.96      | 0.24   | 0.56   | 0.58   | 0.38   | 0.54   |
|               |                | Tobu-Utsunomiya station    | Tochigi    | <0.05     | 0.99   | <0.01  | <0.01  | <0.05  | <0.01  |
| Tokyo Station | Tokyo          | <0.05                      | <0.001     | <0.001    | <0.001 | <0.001 | <0.001 |        |        |
| Ueno Station  | Tokyo          | 0.10                       | <0.001     | <0.001    | <0.001 | <0.001 | <0.001 |        |        |
|               | 08:00–11:59 AM | Central Hirosaki Station   | Aomori     | 0.31      | 0.71   | 0.44   | 0.53   | 0.70   | 0.23   |

|                            |           |        |        |        |        |        |        |
|----------------------------|-----------|--------|--------|--------|--------|--------|--------|
| Chuo Maebashi Station      | Gunma     | 0.13   | <0.05  | <0.001 | <0.001 | <0.001 | <0.001 |
| Fushimi Station            | Aichi     | <0.001 | <0.001 | <0.001 | <0.001 | <0.001 | <0.001 |
| Ginza Station              | Tokyo     | <0.001 | <0.001 | <0.001 | <0.001 | <0.001 | <0.01  |
| Hakata Station             | Fukuoka   | <0.001 | <0.001 | <0.001 | <0.001 | <0.001 | <0.001 |
| Hamamatsu Station          | Shizuoka  | <0.001 | <0.001 | <0.001 | <0.001 | <0.001 | <0.001 |
| Harajuku Station           | Tokyo     | <0.001 | <0.001 | <0.001 | <0.001 | <0.001 | <0.001 |
| Hatchobori Station         | Hiroshima | <0.001 | <0.001 | <0.001 | <0.001 | <0.001 | <0.001 |
| Ikebukuro Station          | Tokyo     | <0.05  | <0.001 | <0.001 | <0.001 | <0.001 | <0.01  |
| Kanko-dori Station         | Nagasaki  | 0.93   | 0.69   | 0.87   | 0.88   | 0.93   | 0.94   |
| Kannai Station             | Kanagawa  | <0.001 | <0.001 | <0.001 | <0.001 | <0.001 | <0.001 |
| Kawaramachi Station        | Kagawa    | <0.01  | <0.05  | <0.001 | <0.01  | 0.21   | <0.001 |
| Kawaramachi Station        | Kyoto     | <0.001 | <0.001 | <0.001 | <0.001 | <0.05  | <0.05  |
| Kichijoji Station          | Tokyo     | <0.05  | <0.001 | <0.001 | <0.001 | <0.001 | <0.001 |
| Kitashinchi Station        | Osaka     | <0.001 | <0.001 | <0.001 | <0.001 | <0.001 | <0.001 |
| Kotodai-Koen Station       | Miyagi    | 0.71   | 0.46   | 0.41   | 0.43   | 0.64   | 0.47   |
| Makishi Station            | Okinawa   | <0.001 | <0.001 | <0.001 | <0.001 | 0.18   | <0.001 |
| Motomachi-Chukagai Station | Kanagawa  | 0.09   | <0.001 | <0.001 | <0.001 | <0.001 | <0.001 |
| Nakasu-kawabata Station    | Fukuoka   | <0.001 | <0.001 | <0.001 | <0.001 | <0.001 | <0.001 |
| Namba Station              | Osaka     | <0.001 | <0.001 | <0.001 | <0.001 | <0.001 | <0.001 |
| Odori Station              | Hokkaido  | <0.001 | <0.001 | <0.001 | <0.001 | <0.001 | <0.001 |
| Roppongi Station           | Tokyo     | <0.001 | <0.001 | <0.001 | <0.001 | <0.001 | <0.05  |
| Sakae Station              | Aichi     | <0.001 | <0.001 | <0.001 | <0.001 | <0.001 | <0.001 |
| Sakuragicho Station        | Kanagawa  | <0.001 | <0.001 | <0.05  | <0.001 | <0.05  | <0.01  |
| Shibuya Center Street      | Tokyo     | <0.05  | <0.001 | <0.001 | <0.001 | <0.001 | <0.01  |
| Shibuya Station            | Tokyo     | <0.01  | <0.001 | <0.001 | <0.001 | <0.001 | <0.001 |
| Shinagawa Station          | Tokyo     | <0.001 | <0.001 | <0.001 | <0.001 | <0.001 | <0.001 |
| Shinbashi Station          | Tokyo     | <0.001 | <0.001 | <0.001 | <0.001 | <0.001 | <0.001 |
| Shinjuku Kabukicho         | Tokyo     | <0.001 | <0.001 | <0.001 | <0.001 | <0.001 | <0.05  |
| Shinsaibashi Station       | Osaka     | <0.001 | <0.001 | <0.001 | <0.001 | <0.001 | <0.001 |
| Susukino Station           | Hokkaido  | <0.001 | <0.001 | <0.001 | <0.001 | <0.001 | <0.001 |
| Tamachi Station            | Okayama   | 0.54   | 0.72   | 0.65   | 0.66   | 0.41   | 0.42   |
| Tobu-Utsunomiya station    | Tochigi   | 0.95   | <0.05  | <0.01  | <0.001 | <0.01  | <0.001 |
| Tokyo Station              | Tokyo     | <0.001 | <0.001 | <0.001 | <0.001 | <0.001 | <0.001 |
| Ueno Station               | Tokyo     | <0.001 | <0.001 | <0.001 | <0.001 | <0.001 | <0.001 |

12:00–15:59 PM

|                          |           |        |        |        |        |        |        |
|--------------------------|-----------|--------|--------|--------|--------|--------|--------|
| Central Hirosaki Station | Aomori    | 0.76   | 0.32   | 0.49   | 0.59   | 0.72   | <0.05  |
| Chuo Maebashi Station    | Gunma     | 0.30   | <0.001 | <0.001 | <0.001 | <0.001 | <0.05  |
| Fushimi Station          | Aichi     | <0.001 | <0.001 | <0.001 | <0.001 | <0.001 | <0.001 |
| Ginza Station            | Tokyo     | <0.05  | <0.05  | <0.001 | <0.001 | <0.001 | <0.001 |
| Hakata Station           | Fukuoka   | <0.001 | <0.001 | <0.001 | <0.001 | <0.001 | <0.001 |
| Hamamatsu Station        | Shizuoka  | <0.001 | <0.001 | <0.001 | <0.001 | <0.001 | <0.001 |
| Harajuku Station         | Tokyo     | <0.001 | <0.05  | <0.001 | <0.05  | <0.001 | <0.001 |
| Hatchobori Station       | Hiroshima | <0.001 | <0.001 | <0.001 | <0.001 | <0.001 | <0.01  |
| Ikebukuro Station        | Tokyo     | 0.06   | <0.05  | <0.001 | <0.05  | <0.05  | <0.01  |
| Kanko-dori Station       | Nagasaki  | 0.61   | 0.71   | 0.73   | 0.49   | 0.65   | 0.90   |
| Kannai Station           | Kanagawa  | <0.001 | <0.001 | <0.001 | <0.001 | <0.001 | <0.001 |
| Kawaramachi Station      | Kagawa    | <0.001 | 0.46   | <0.001 | <0.001 | 0.24   | 0.34   |
| Kawaramachi Station      | Kyoto     | <0.001 | <0.05  | 0.19   | 0.75   | 0.10   | 0.46   |
| Kichijoji Station        | Tokyo     | <0.001 | 0.22   | <0.001 | <0.001 | <0.001 | <0.01  |



|                            |          |        |        |        |        |        |        |
|----------------------------|----------|--------|--------|--------|--------|--------|--------|
| Kitashinchi Station        | Osaka    | <0.001 | <0.001 | <0.001 | <0.001 | <0.001 | <0.001 |
| Kotodai-Koen Station       | Miyagi   | 0.46   | 0.49   | 0.39   | 0.50   | 0.67   | 0.51   |
| Makishi Station            | Okinawa  | 0.53   | <0.001 | <0.001 | <0.001 | 0.41   | <0.001 |
| Motomachi-Chukagai Station | Kanagawa | 0.87   | 0.93   | <0.001 | 0.92   | <0.001 | 0.83   |
| Nakasu-kawabata Station    | Fukuoka  | <0.001 | <0.001 | <0.001 | <0.001 | <0.001 | <0.001 |
| Namba Station              | Osaka    | <0.05  | <0.001 | <0.001 | <0.001 | <0.001 | <0.001 |
| Odori Station              | Hokkaido | <0.001 | <0.001 | <0.001 | <0.001 | <0.001 | <0.001 |
| Roppongi Station           | Tokyo    | <0.001 | <0.01  | <0.001 | <0.001 | <0.001 | <0.001 |
| Sakae Station              | Aichi    | <0.001 | <0.001 | <0.001 | <0.001 | <0.001 | <0.001 |
| Sakuragicho Station        | Kanagawa | <0.01  | 0.37   | 0.75   | 0.71   | 0.33   | <0.05  |
| Shibuya Center Street      | Tokyo    | <0.05  | <0.01  | <0.001 | <0.001 | <0.001 | <0.05  |
| Shibuya Station            | Tokyo    | <0.05  | <0.001 | <0.001 | <0.001 | <0.001 | <0.05  |
| Shinagawa Station          | Tokyo    | <0.001 | <0.001 | <0.001 | <0.001 | <0.001 | <0.05  |
| Shinbashi Station          | Tokyo    | <0.001 | <0.001 | <0.001 | <0.001 | <0.001 | <0.05  |
| Shinjuku Kabukicho         | Tokyo    | <0.001 | <0.001 | <0.01  | <0.001 | <0.001 | <0.05  |
| Shinsaibashi Station       | Osaka    | <0.001 | <0.001 | <0.001 | <0.001 | <0.001 | <0.001 |
| Susukino Station           | Hokkaido | <0.001 | <0.001 | <0.001 | <0.001 | <0.001 | <0.001 |
| Tamachi Station            | Okayama  | 0.38   | 0.79   | 0.62   | 0.71   | 0.57   | 0.53   |
| Tobu-Utsunomiya station    | Tochigi  | 0.93   | <0.001 | <0.01  | <0.01  | <0.001 | <0.001 |
| Tokyo Station              | Tokyo    | <0.001 | <0.001 | <0.001 | <0.001 | <0.001 | <0.001 |
| Ueno Station               | Tokyo    | <0.001 | <0.05  | <0.001 | <0.05  | <0.001 | 0.12   |

16:00-19:59 PM

|                            |           |        |        |        |        |        |        |
|----------------------------|-----------|--------|--------|--------|--------|--------|--------|
| Central Hirosaki Station   | Aomori    | 0.33   | 0.51   | 0.34   | 0.54   | 0.41   | 0.62   |
| Chuo Maebashi Station      | Gunma     | <0.05  | <0.001 | <0.001 | <0.001 | <0.001 | <0.05  |
| Fushimi Station            | Aichi     | <0.001 | <0.001 | <0.001 | <0.001 | <0.001 | <0.001 |
| Ginza Station              | Tokyo     | <0.001 | <0.001 | <0.001 | <0.001 | <0.001 | <0.001 |
| Hakata Station             | Fukuoka   | <0.001 | <0.001 | <0.001 | <0.001 | <0.001 | <0.001 |
| Hamamatsu Station          | Shizuoka  | <0.001 | <0.001 | <0.001 | <0.001 | <0.001 | <0.001 |
| Harajuku Station           | Tokyo     | 0.16   | <0.001 | <0.001 | <0.001 | <0.001 | <0.001 |
| Hatchobori Station         | Hiroshima | <0.001 | <0.001 | <0.001 | <0.001 | <0.001 | <0.001 |
| Ikebukuro Station          | Tokyo     | <0.01  | <0.001 | <0.001 | <0.001 | <0.001 | <0.001 |
| Kanko-dori Station         | Nagasaki  | 0.42   | 0.65   | 0.81   | 0.88   | 0.79   | 0.75   |
| Kannai Station             | Kanagawa  | <0.001 | <0.001 | <0.001 | <0.001 | <0.001 | <0.001 |
| Kawaramachi Station        | Kagawa    | <0.001 | 0.08   | 0.06   | <0.05  | 0.07   | 0.82   |
| Kawaramachi Station        | Kyoto     | <0.001 | <0.05  | <0.01  | <0.01  | <0.001 | 0.24   |
| Kichijoji Station          | Tokyo     | <0.01  | 0.24   | 0.13   | <0.001 | <0.05  | <0.001 |
| Kitashinchi Station        | Osaka     | <0.001 | <0.001 | <0.001 | <0.001 | <0.001 | <0.001 |
| Kotodai-Koen Station       | Miyagi    | 0.45   | 0.56   | 0.34   | 0.49   | 0.54   | 0.48   |
| Makishi Station            | Okinawa   | <0.001 | <0.001 | <0.001 | <0.01  | <0.001 | <0.001 |
| Motomachi-Chukagai Station | Kanagawa  | 0.33   | <0.001 | <0.001 | <0.001 | <0.001 | <0.001 |
| Nakasu-kawabata Station    | Fukuoka   | <0.001 | <0.001 | <0.001 | <0.001 | <0.001 | <0.001 |
| Namba Station              | Osaka     | <0.001 | <0.001 | <0.001 | <0.001 | <0.001 | <0.001 |
| Odori Station              | Hokkaido  | <0.001 | <0.001 | <0.001 | <0.001 | <0.001 | <0.001 |
| Roppongi Station           | Tokyo     | <0.001 | <0.05  | <0.01  | <0.001 | <0.001 | <0.05  |
| Sakae Station              | Aichi     | <0.001 | <0.001 | <0.001 | <0.001 | <0.001 | <0.001 |
| Sakuragicho Station        | Kanagawa  | <0.001 | <0.001 | <0.001 | <0.001 | <0.001 | 0.97   |
| Shibuya Center Street      | Tokyo     | 0.11   | <0.001 | <0.001 | <0.001 | <0.001 | <0.001 |
| Shibuya Station            | Tokyo     | 0.11   | <0.001 | <0.001 | <0.001 | <0.001 | <0.001 |
| Shinagawa Station          | Tokyo     | <0.001 | <0.001 | <0.001 | <0.001 | <0.001 | <0.001 |

|                         |          |        |        |        |        |        |        |
|-------------------------|----------|--------|--------|--------|--------|--------|--------|
| Shinbashi Station       | Tokyo    | <0.001 | <0.001 | <0.001 | <0.001 | <0.001 | <0.05  |
| Shinjuku Kabukicho      | Tokyo    | <0.05  | <0.001 | <0.001 | <0.001 | <0.001 | <0.001 |
| Shinsaibashi Station    | Osaka    | <0.001 | <0.001 | <0.001 | <0.001 | <0.001 | <0.001 |
| Susukino Station        | Hokkaido | <0.01  | <0.001 | <0.001 | <0.001 | <0.001 | <0.001 |
| Tamachi Station         | Okayama  | 0.64   | 0.58   | 0.58   | 0.58   | 0.56   | 0.37   |
| Tobu-Utsunomiya station | Tochigi  | <0.001 | <0.05  | <0.001 | <0.01  | <0.001 | <0.001 |
| Tokyo Station           | Tokyo    | <0.001 | <0.001 | <0.001 | <0.001 | <0.001 | <0.001 |
| Ueno Station            | Tokyo    | <0.001 | <0.001 | <0.001 | <0.001 | <0.001 | <0.05  |

20:00–23:59 PM

|                            |           |        |        |        |        |        |        |
|----------------------------|-----------|--------|--------|--------|--------|--------|--------|
| Central Hirosaki Station   | Aomori    | 0.84   | 0.21   | 0.22   | 0.40   | 0.44   | 0.60   |
| Chuo Maebashi Station      | Gunma     | 0.10   | <0.001 | <0.01  | <0.001 | <0.001 | <0.01  |
| Fushimi Station            | Aichi     | <0.001 | <0.05  | <0.001 | <0.001 | <0.001 | <0.001 |
| Ginza Station              | Tokyo     | <0.001 | <0.001 | <0.001 | <0.001 | <0.001 | <0.001 |
| Hakata Station             | Fukuoka   | <0.001 | <0.001 | <0.001 | <0.001 | <0.001 | <0.001 |
| Hamamatsu Station          | Shizuoka  | <0.001 | <0.001 | <0.001 | <0.001 | <0.001 | <0.001 |
| Harajuku Station           | Tokyo     | <0.001 | <0.001 | <0.001 | <0.001 | <0.001 | <0.001 |
| Hatchobori Station         | Hiroshima | <0.001 | <0.001 | <0.001 | <0.001 | <0.001 | <0.001 |
| Ikebukuro Station          | Tokyo     | <0.001 | <0.001 | <0.001 | <0.001 | <0.001 | <0.001 |
| Kanko-dori Station         | Nagasaki  | 0.90   | 0.37   | 0.33   | 0.48   | 0.56   | 0.33   |
| Kannai Station             | Kanagawa  | <0.001 | <0.001 | <0.001 | <0.001 | <0.001 | <0.001 |
| Kawaramachi Station        | Kagawa    | <0.001 | 0.95   | 0.77   | 0.19   | 0.60   | 0.96   |
| Kawaramachi Station        | Kyoto     | 0.05   | 0.77   | 0.08   | <0.05  | <0.001 | <0.001 |
| Kichijoji Station          | Tokyo     | <0.001 | <0.01  | <0.001 | <0.001 | 0.06   | 0.07   |
| Kitashinchi Station        | Osaka     | <0.001 | <0.001 | <0.001 | <0.001 | <0.001 | <0.001 |
| Kotodai-Koen Station       | Miyagi    | 0.15   | 0.55   | 0.32   | 0.56   | 0.32   | 0.98   |
| Makishi Station            | Okinawa   | <0.001 | <0.001 | <0.001 | <0.001 | <0.001 | <0.001 |
| Motomachi-Chukagai Station | Kanagawa  | 0.34   | <0.001 | <0.001 | <0.001 | <0.001 | <0.001 |
| Nakasu-kawabata Station    | Fukuoka   | <0.05  | <0.001 | <0.001 | <0.001 | <0.001 | <0.001 |
| Namba Station              | Osaka     | <0.001 | <0.001 | <0.001 | <0.001 | <0.001 | <0.001 |
| Odori Station              | Hokkaido  | <0.001 | <0.001 | <0.001 | <0.001 | <0.001 | <0.001 |
| Roppongi Station           | Tokyo     | 0.26   | <0.01  | <0.01  | <0.001 | <0.001 | 0.40   |
| Sakae Station              | Aichi     | <0.001 | <0.01  | <0.001 | <0.001 | <0.001 | <0.001 |
| Sakuragicho Station        | Kanagawa  | <0.001 | 0.46   | 0.93   | <0.001 | <0.001 | <0.01  |
| Shibuya Center Street      | Tokyo     | <0.05  | <0.001 | <0.001 | <0.001 | <0.001 | <0.001 |
| Shibuya Station            | Tokyo     | <0.01  | <0.001 | <0.001 | <0.001 | <0.001 | <0.001 |
| Shinagawa Station          | Tokyo     | <0.001 | <0.001 | <0.001 | <0.001 | <0.001 | <0.001 |
| Shinbashi Station          | Tokyo     | <0.05  | <0.001 | <0.001 | <0.001 | <0.001 | <0.001 |
| Shinjuku Kabukicho         | Tokyo     | <0.05  | <0.001 | <0.001 | <0.001 | <0.001 | <0.001 |
| Shinsaibashi Station       | Osaka     | <0.001 | <0.001 | <0.001 | <0.001 | <0.001 | <0.001 |
| Susukino Station           | Hokkaido  | <0.001 | <0.001 | <0.001 | <0.001 | <0.001 | <0.001 |
| Tamachi Station            | Okayama   | 0.44   | 0.19   | 0.54   | 0.85   | 0.59   | 0.28   |
| Tobu-Utsunomiya station    | Tochigi   | <0.001 | 0.11   | <0.001 | 0.10   | 0.26   | <0.001 |
| Tokyo Station              | Tokyo     | <0.001 | <0.001 | <0.001 | <0.001 | <0.001 | <0.01  |
| Ueno Station               | Tokyo     | <0.001 | <0.001 | <0.001 | <0.001 | <0.001 | <0.001 |

Second

0:00–7:59 AM

|                          |          |   |   |   |   |   |   |
|--------------------------|----------|---|---|---|---|---|---|
| Susukino Station         | Hokkaido | – | – | – | – | – | – |
| Odori Station            | Hokkaido | – | – | – | – | – | – |
| Central Hirosaki Station | Aomori   | – | – | – | – | – | – |

|                            |           |        |        |        |        |        |        |
|----------------------------|-----------|--------|--------|--------|--------|--------|--------|
| Kotodai-Koen Station       | Miyagi    | -      | -      | -      | -      | -      | -      |
| Tobu-Utsunomiya station    | Tochigi   | <0.001 | <0.001 | <0.001 | 0.15   | <0.01  | <0.05  |
| Chuo Maebashi Station      | Gunma     | -      | -      | -      | -      | -      | -      |
| Shibuya Station            | Tokyo     | <0.001 | <0.001 | <0.001 | <0.001 | <0.001 | <0.001 |
| Shibuya Center Street      | Tokyo     | <0.001 | <0.001 | <0.001 | <0.001 | <0.001 | <0.01  |
| Harajuku Station           | Tokyo     | <0.001 | 0.12   | 1.00   | <0.001 | <0.001 | <0.05  |
| Shinjuku Kabukicho         | Tokyo     | 0.50   | <0.001 | <0.001 | 0.92   | <0.05  | <0.01  |
| Ikebukuro Station          | Tokyo     | <0.01  | <0.001 | 0.91   | 0.39   | <0.001 | <0.001 |
| Tokyo Station              | Tokyo     | <0.001 | 0.57   | 0.88   | 0.90   | 0.29   | <0.05  |
| Shinbashi Station          | Tokyo     | <0.001 | 0.22   | 1.00   | 0.98   | 0.31   | <0.001 |
| Shinagawa Station          | Tokyo     | 0.05   | <0.001 | <0.001 | <0.001 | <0.01  | 0.71   |
| Ueno Station               | Tokyo     | 0.87   | 0.42   | <0.001 | 1.00   | <0.001 | <0.001 |
| Ginza Station              | Tokyo     | <0.001 | <0.05  | 0.43   | 1.00   | 0.82   | 0.92   |
| Roppongi Station           | Tokyo     | <0.001 | <0.001 | <0.01  | <0.01  | 0.84   | <0.001 |
| Kichijoji Station          | Tokyo     | <0.001 | <0.001 | 0.92   | <0.05  | <0.001 | 0.54   |
| Motomachi-Chukagai Station | Kanagawa  | <0.001 | <0.001 | <0.001 | <0.01  | <0.001 | <0.05  |
| Sakuragicho Station        | Kanagawa  | 1.00   | <0.001 | 0.30   | 1.00   | <0.001 | 1.00   |
| Kannai Station             | Kanagawa  | <0.001 | 0.26   | <0.001 | <0.001 | <0.01  | 0.57   |
| Hamamatsu Station          | Shizuoka  | -      | -      | -      | -      | -      | -      |
| Sakae Station              | Aichi     | 0.44   | 0.57   | 0.28   | 0.69   | <0.01  | 0.94   |
| Fushimi Station            | Aichi     | 0.47   | <0.001 | <0.001 | <0.001 | <0.001 | 0.18   |
| Kawaramachi Station        | Kyoto     | 0.93   | <0.001 | 0.71   | <0.05  | <0.001 | <0.001 |
| Shinsaibashi Station       | Osaka     | 0.88   | <0.05  | <0.001 | <0.01  | 0.17   | <0.001 |
| Namba Station              | Osaka     | 0.57   | <0.01  | <0.001 | <0.001 | <0.001 | <0.001 |
| Kitashinchi Station        | Osaka     | 0.28   | <0.001 | <0.001 | <0.001 | <0.05  | <0.001 |
| Tamachi Station            | Okayama   | -      | -      | -      | -      | -      | -      |
| Hatchobori Station         | Hiroshima | -      | -      | -      | -      | -      | -      |
| Kawaramachi Station        | Kagawa    | -      | -      | -      | -      | -      | -      |
| Hakata Station             | Fukuoka   | <0.001 | <0.001 | <0.01  | <0.001 | <0.001 | <0.001 |
| Nakasu-kawabata Station    | Fukuoka   | <0.001 | <0.001 | <0.001 | <0.001 | <0.001 | <0.001 |
| Kanko-dori Station         | Nagasaki  | -      | -      | -      | -      | -      | -      |
| Makishi Station            | Okinawa   | -      | -      | -      | -      | -      | -      |
| 08:00-11:59 AM             |           |        |        |        |        |        |        |
| Susukino Station           | Hokkaido  | -      | -      | -      | -      | -      | -      |
| Odori Station              | Hokkaido  | -      | -      | -      | -      | -      | -      |
| Central Hirosaki Station   | Aomori    | -      | -      | -      | -      | -      | -      |
| Kotodai-Koen Station       | Miyagi    | -      | -      | -      | -      | -      | -      |
| Tobu-Utsunomiya station    | Tochigi   | 0.70   | <0.001 | <0.001 | <0.05  | 0.25   | <0.05  |
| Chuo Maebashi Station      | Gunma     | -      | -      | -      | -      | -      | -      |
| Shibuya Station            | Tokyo     | <0.001 | <0.001 | 0.98   | 0.62   | 1.00   | <0.001 |
| Shibuya Center Street      | Tokyo     | <0.001 | <0.001 | 0.95   | 0.86   | 1.00   | <0.001 |
| Harajuku Station           | Tokyo     | <0.001 | <0.001 | 0.83   | 0.96   | 0.05   | <0.001 |
| Shinjuku Kabukicho         | Tokyo     | <0.001 | <0.001 | <0.001 | <0.01  | 0.45   | <0.001 |
| Ikebukuro Station          | Tokyo     | 0.99   | <0.001 | 0.14   | 0.32   | 1.00   | <0.001 |
| Tokyo Station              | Tokyo     | 0.97   | 0.33   | 0.92   | 1.00   | 0.98   | 0.92   |
| Shinbashi Station          | Tokyo     | <0.001 | 0.99   | 0.98   | 1.00   | 0.88   | <0.001 |
| Shinagawa Station          | Tokyo     | <0.001 | 0.90   | 1.00   | 1.00   | 0.48   | <0.001 |
| Ueno Station               | Tokyo     | <0.001 | <0.05  | <0.05  | <0.001 | 0.96   | <0.001 |
| Ginza Station              | Tokyo     | <0.001 | 0.07   | 1.00   | 0.61   | <0.05  | <0.001 |

|                            |           |        |        |        |        |        |        |
|----------------------------|-----------|--------|--------|--------|--------|--------|--------|
| Roppongi Station           | Tokyo     | <0.001 | 0.40   | <0.001 | <0.01  | <0.001 | 1.00   |
| Kichijoji Station          | Tokyo     | 1.00   | 0.20   | 0.94   | <0.001 | <0.01  | <0.001 |
| Motomachi-Chukagai Station | Kanagawa  | <0.001 | <0.001 | <0.001 | <0.05  | <0.001 | 0.26   |
| Sakuragicho Station        | Kanagawa  | <0.001 | <0.001 | 0.25   | 1.00   | <0.001 | <0.001 |
| Kannai Station             | Kanagawa  | <0.001 | <0.001 | <0.001 | <0.001 | 0.93   | <0.001 |
| Hamamatsu Station          | Shizuoka  | -      | -      | -      | -      | -      | -      |
| Sakae Station              | Aichi     | <0.001 | <0.001 | <0.001 | <0.001 | <0.001 | 0.91   |
| Fushimi Station            | Aichi     | <0.01  | <0.001 | <0.001 | <0.01  | <0.05  | 0.96   |
| Kawaramachi Station        | Kyoto     | <0.001 | <0.001 | <0.001 | <0.001 | <0.001 | <0.001 |
| Shinsaibashi Station       | Osaka     | <0.001 | <0.001 | <0.001 | <0.001 | <0.001 | <0.001 |
| Namba Station              | Osaka     | <0.001 | <0.001 | <0.001 | <0.001 | <0.001 | <0.001 |
| Kitashinchi Station        | Osaka     | <0.001 | <0.001 | <0.001 | <0.01  | <0.001 | <0.001 |
| Tamachi Station            | Okayama   | -      | -      | -      | -      | -      | -      |
| Hatchobori Station         | Hiroshima | -      | -      | -      | -      | -      | -      |
| Kawaramachi Station        | Kagawa    | -      | -      | -      | -      | -      | -      |
| Hakata Station             | Fukuoka   | 0.90   | <0.001 | 0.05   | <0.05  | <0.001 | <0.01  |
| Nakasu-kawabata Station    | Fukuoka   | <0.001 | <0.01  | <0.001 | <0.01  | <0.001 | <0.05  |
| Kanko-dori Station         | Nagasaki  | -      | -      | -      | -      | -      | -      |
| Makishi Station            | Okinawa   | -      | -      | -      | -      | -      | -      |

12:00-15:59 PM

|                            |          |        |        |        |        |        |        |
|----------------------------|----------|--------|--------|--------|--------|--------|--------|
| Susukino Station           | Hokkaido | -      | -      | -      | -      | -      | -      |
| Odori Station              | Hokkaido | -      | -      | -      | -      | -      | -      |
| Central Hirosaki Station   | Aomori   | -      | -      | -      | -      | -      | -      |
| Kotodai-Koen Station       | Miyagi   | -      | -      | -      | -      | -      | -      |
| Tobu-Utsunomiya station    | Tochigi  | <0.01  | 0.77   | 0.94   | <0.05  | <0.01  | 0.05   |
| Chuo Maebashi Station      | Gunma    | -      | -      | -      | -      | -      | -      |
| Shibuya Station            | Tokyo    | <0.001 | <0.001 | <0.001 | <0.001 | <0.001 | <0.001 |
| Shibuya Center Street      | Tokyo    | <0.001 | <0.001 | <0.001 | <0.001 | <0.001 | <0.001 |
| Harajuku Station           | Tokyo    | <0.001 | <0.001 | 0.80   | <0.001 | <0.001 | <0.001 |
| Shinjuku Kabukicho         | Tokyo    | <0.001 | <0.001 | <0.001 | <0.001 | 0.26   | <0.001 |
| Ikebukuro Station          | Tokyo    | <0.001 | <0.001 | <0.001 | <0.001 | 0.90   | <0.001 |
| Tokyo Station              | Tokyo    | <0.001 | 0.22   | 0.99   | 1.00   | 0.98   | <0.001 |
| Shinbashi Station          | Tokyo    | <0.001 | 0.80   | 0.71   | 1.00   | <0.01  | <0.001 |
| Shinagawa Station          | Tokyo    | <0.01  | 0.61   | 1.00   | 0.97   | <0.001 | <0.001 |
| Ueno Station               | Tokyo    | <0.001 | <0.001 | <0.001 | <0.001 | <0.001 | <0.001 |
| Ginza Station              | Tokyo    | <0.001 | <0.05  | 0.96   | 0.67   | <0.001 | <0.001 |
| Roppongi Station           | Tokyo    | <0.001 | 0.31   | 0.95   | 0.07   | 0.13   | <0.001 |
| Kichijoji Station          | Tokyo    | <0.001 | <0.001 | <0.001 | 1.00   | <0.05  | <0.001 |
| Motomachi-Chukagai Station | Kanagawa | <0.001 | <0.05  | <0.001 | <0.001 | <0.001 | 0.89   |
| Sakuragicho Station        | Kanagawa | <0.001 | <0.001 | <0.001 | 1.00   | 0.28   | <0.001 |
| Kannai Station             | Kanagawa | <0.001 | <0.001 | <0.01  | <0.001 | 0.72   | <0.001 |
| Hamamatsu Station          | Shizuoka | -      | -      | -      | -      | -      | -      |
| Sakae Station              | Aichi    | <0.05  | <0.001 | <0.001 | <0.001 | <0.01  | 0.33   |
| Fushimi Station            | Aichi    | <0.001 | <0.001 | <0.001 | <0.001 | <0.001 | 0.79   |
| Kawaramachi Station        | Kyoto    | <0.001 | 0.30   | <0.05  | <0.01  | 0.70   | <0.001 |
| Shinsaibashi Station       | Osaka    | 0.51   | <0.001 | <0.001 | <0.001 | <0.001 | 0.77   |
| Namba Station              | Osaka    | 0.46   | <0.001 | <0.001 | <0.001 | <0.001 | 0.11   |
| Kitashinchi Station        | Osaka    | <0.05  | <0.001 | <0.001 | <0.001 | <0.001 | 0.97   |
| Tamachi Station            | Okayama  | -      | -      | -      | -      | -      | -      |

|                |                            |           |        |        |        |        |        |        |
|----------------|----------------------------|-----------|--------|--------|--------|--------|--------|--------|
|                | Hatchobori Station         | Hiroshima | -      | -      | -      | -      | -      | -      |
|                | Kawaramachi Station        | Kagawa    | -      | -      | -      | -      | -      | -      |
|                | Hakata Station             | Fukuoka   | <0.01  | <0.001 | <0.01  | 0.65   | 0.17   | 0.97   |
|                | Nakasu-kawabata Station    | Fukuoka   | 0.07   | <0.001 | <0.001 | <0.01  | 0.90   | <0.001 |
|                | Kanko-dori Station         | Nagasaki  | -      | -      | -      | -      | -      | -      |
|                | Makishi Station            | Okinawa   | -      | -      | -      | -      | -      | -      |
| 16:00-19:59 PM |                            |           |        |        |        |        |        |        |
|                | Susukino Station           | Hokkaido  | -      | -      | -      | -      | -      | -      |
|                | Odori Station              | Hokkaido  | -      | -      | -      | -      | -      | -      |
|                | Central Hirosaki Station   | Aomori    | -      | -      | -      | -      | -      | -      |
|                | Kotodai-Koen Station       | Miyagi    | -      | -      | -      | -      | -      | -      |
|                | Tobu-Utsunomiya station    | Tochigi   | 0.07   | 0.05   | <0.05  | <0.001 | <0.001 | 0.29   |
|                | Chuo Maebashi Station      | Gunma     | -      | -      | -      | -      | -      | -      |
|                | Shibuya Station            | Tokyo     | <0.001 | <0.001 | <0.001 | <0.001 | <0.001 | <0.001 |
|                | Shibuya Center Street      | Tokyo     | <0.001 | <0.001 | <0.001 | <0.001 | <0.001 | <0.001 |
|                | Harajuku Station           | Tokyo     | <0.001 | <0.001 | <0.001 | <0.001 | <0.001 | <0.001 |
|                | Shinjuku Kabukicho         | Tokyo     | <0.001 | <0.001 | <0.001 | <0.001 | <0.001 | <0.001 |
|                | Ikebukuro Station          | Tokyo     | <0.001 | <0.001 | <0.001 | <0.001 | <0.001 | 0.09   |
|                | Tokyo Station              | Tokyo     | <0.01  | <0.05  | 0.28   | 0.99   | 1.00   | <0.001 |
|                | Shinbashi Station          | Tokyo     | <0.001 | 0.81   | 1.00   | 1.00   | 0.31   | <0.001 |
|                | Shinagawa Station          | Tokyo     | 0.39   | 0.62   | 0.89   | 0.89   | 0.88   | <0.001 |
|                | Ueno Station               | Tokyo     | <0.01  | <0.01  | <0.001 | 1.00   | 0.98   | <0.001 |
|                | Ginza Station              | Tokyo     | <0.001 | <0.001 | <0.001 | 0.05   | 0.99   | <0.001 |
|                | Roppongi Station           | Tokyo     | <0.001 | 0.94   | 0.10   | <0.01  | 0.91   | <0.001 |
|                | Kichijoji Station          | Tokyo     | <0.001 | <0.001 | <0.001 | <0.001 | <0.001 | <0.001 |
|                | Motomachi-Chukagai Station | Kanagawa  | <0.001 | 0.90   | <0.001 | <0.001 | <0.001 | <0.01  |
|                | Sakuragicho Station        | Kanagawa  | <0.001 | <0.001 | <0.001 | <0.001 | <0.001 | <0.001 |
|                | Kannai Station             | Kanagawa  | <0.001 | <0.001 | <0.001 | <0.001 | 0.96   | <0.001 |
|                | Hamamatsu Station          | Shizuoka  | -      | -      | -      | -      | -      | -      |
|                | Sakae Station              | Aichi     | 0.93   | <0.001 | <0.001 | <0.01  | <0.001 | 0.86   |
|                | Fushimi Station            | Aichi     | <0.001 | <0.001 | <0.001 | <0.001 | <0.001 | <0.01  |
|                | Kawaramachi Station        | Kyoto     | <0.001 | <0.001 | <0.001 | <0.001 | <0.001 | <0.01  |
|                | Shinsaibashi Station       | Osaka     | <0.001 | <0.001 | <0.001 | <0.001 | <0.001 | 1.00   |
|                | Namba Station              | Osaka     | 0.88   | <0.001 | <0.001 | <0.001 | <0.001 | 0.92   |
|                | Kitashinchi Station        | Osaka     | <0.05  | <0.001 | <0.001 | <0.001 | <0.001 | 0.21   |
|                | Tamachi Station            | Okayama   | -      | -      | -      | -      | -      | -      |
|                | Hatchobori Station         | Hiroshima | -      | -      | -      | -      | -      | -      |
|                | Kawaramachi Station        | Kagawa    | -      | -      | -      | -      | -      | -      |
|                | Hakata Station             | Fukuoka   | 1.00   | <0.001 | <0.01  | <0.001 | <0.01  | <0.05  |
|                | Nakasu-kawabata Station    | Fukuoka   | <0.001 | <0.001 | <0.001 | <0.001 | <0.001 | 0.08   |
|                | Kanko-dori Station         | Nagasaki  | -      | -      | -      | -      | -      | -      |
|                | Makishi Station            | Okinawa   | -      | -      | -      | -      | -      | -      |
| 20:00-23:59 PM |                            |           |        |        |        |        |        |        |
|                | Susukino Station           | Hokkaido  | -      | -      | -      | -      | -      | -      |
|                | Odori Station              | Hokkaido  | -      | -      | -      | -      | -      | -      |
|                | Central Hirosaki Station   | Aomori    | -      | -      | -      | -      | -      | -      |
|                | Kotodai-Koen Station       | Miyagi    | -      | -      | -      | -      | -      | -      |
|                | Tobu-Utsunomiya station    | Tochigi   | <0.001 | <0.001 | <0.001 | 0.93   | <0.001 | 1.00   |
|                | Chuo Maebashi Station      | Gunma     | -      | -      | -      | -      | -      | -      |

|                            |           |        |        |        |        |        |        |
|----------------------------|-----------|--------|--------|--------|--------|--------|--------|
| Shibuya Station            | Tokyo     | <0.001 | 0.38   | 0.97   | 0.58   | 0.96   | <0.001 |
| Shibuya Center Street      | Tokyo     | <0.001 | 0.91   | 1.00   | <0.05  | 1.00   | <0.001 |
| Harajuku Station           | Tokyo     | <0.001 | 0.99   | 1.00   | 0.94   | <0.001 | <0.001 |
| Shinjuku Kabukicho         | Tokyo     | <0.001 | <0.001 | 0.45   | 1.00   | <0.001 | <0.001 |
| Ikebukuro Station          | Tokyo     | <0.001 | <0.001 | 0.13   | 0.98   | 0.06   | <0.001 |
| Tokyo Station              | Tokyo     | <0.001 | <0.001 | <0.001 | <0.001 | <0.001 | <0.001 |
| Shinbashi Station          | Tokyo     | <0.001 | <0.001 | <0.001 | <0.001 | <0.001 | <0.001 |
| Shinagawa Station          | Tokyo     | <0.001 | 0.27   | <0.001 | <0.001 | <0.001 | <0.001 |
| Ueno Station               | Tokyo     | <0.001 | <0.001 | <0.001 | <0.001 | <0.001 | <0.001 |
| GINZA Station              | Tokyo     | <0.001 | <0.001 | <0.001 | <0.001 | 0.24   | <0.001 |
| Roppongi Station           | Tokyo     | <0.001 | <0.001 | <0.001 | <0.001 | 0.37   | <0.001 |
| Kichijoji Station          | Tokyo     | <0.001 | <0.001 | <0.001 | <0.001 | <0.001 | <0.001 |
| Motomachi-Chukagai Station | Kanagawa  | <0.001 | <0.001 | 0.16   | <0.001 | <0.001 | <0.01  |
| Sakuragicho Station        | Kanagawa  | <0.001 | 1.00   | <0.01  | 0.41   | <0.001 | <0.001 |
| Kannai Station             | Kanagawa  | <0.001 | 0.64   | <0.001 | 0.83   | 0.70   | <0.001 |
| Hamamatsu Station          | Shizuoka  | -      | -      | -      | -      | -      | -      |
| Sakae Station              | Aichi     | <0.05  | 0.20   | <0.001 | <0.01  | <0.001 | <0.01  |
| Fushimi Station            | Aichi     | <0.05  | <0.001 | <0.001 | <0.001 | <0.05  | <0.001 |
| Kawaramachi Station        | Kyoto     | 0.05   | <0.001 | 0.23   | <0.001 | <0.001 | 0.13   |
| Shinsaibashi Station       | Osaka     | <0.01  | <0.001 | <0.001 | <0.001 | <0.001 | <0.001 |
| Namba Station              | Osaka     | <0.05  | <0.001 | <0.001 | <0.001 | <0.001 | 0.36   |
| Kitashinchi Station        | Osaka     | 0.93   | <0.01  | <0.001 | <0.001 | <0.001 | 0.26   |
| Tamachi Station            | Okayama   | -      | -      | -      | -      | -      | -      |
| Hatchobori Station         | Hiroshima | -      | -      | -      | -      | -      | -      |
| Kawaramachi Station        | Kagawa    | -      | -      | -      | -      | -      | -      |
| Hakata Station             | Fukuoka   | <0.001 | <0.001 | 0.85   | 1.00   | <0.001 | <0.05  |
| Nakasu-kawabata Station    | Fukuoka   | <0.01  | <0.001 | <0.001 | <0.001 | <0.001 | <0.01  |
| Kanko-dori Station         | Nagasaki  | -      | -      | -      | -      | -      | -      |
| Makishi Station            | Okinawa   | -      | -      | -      | -      | -      | -      |

**Figure S1: A map showing the location of the 35 areas.** For simplicity of the map, all areas in the same prefecture are combined into the same plot. This map is based on the Digital Map 25000 (Map Image) published by Geospatial Information Authority of Japan (Approval No.603FY2017 information usage <<http://www.gsi.go.jp>>).

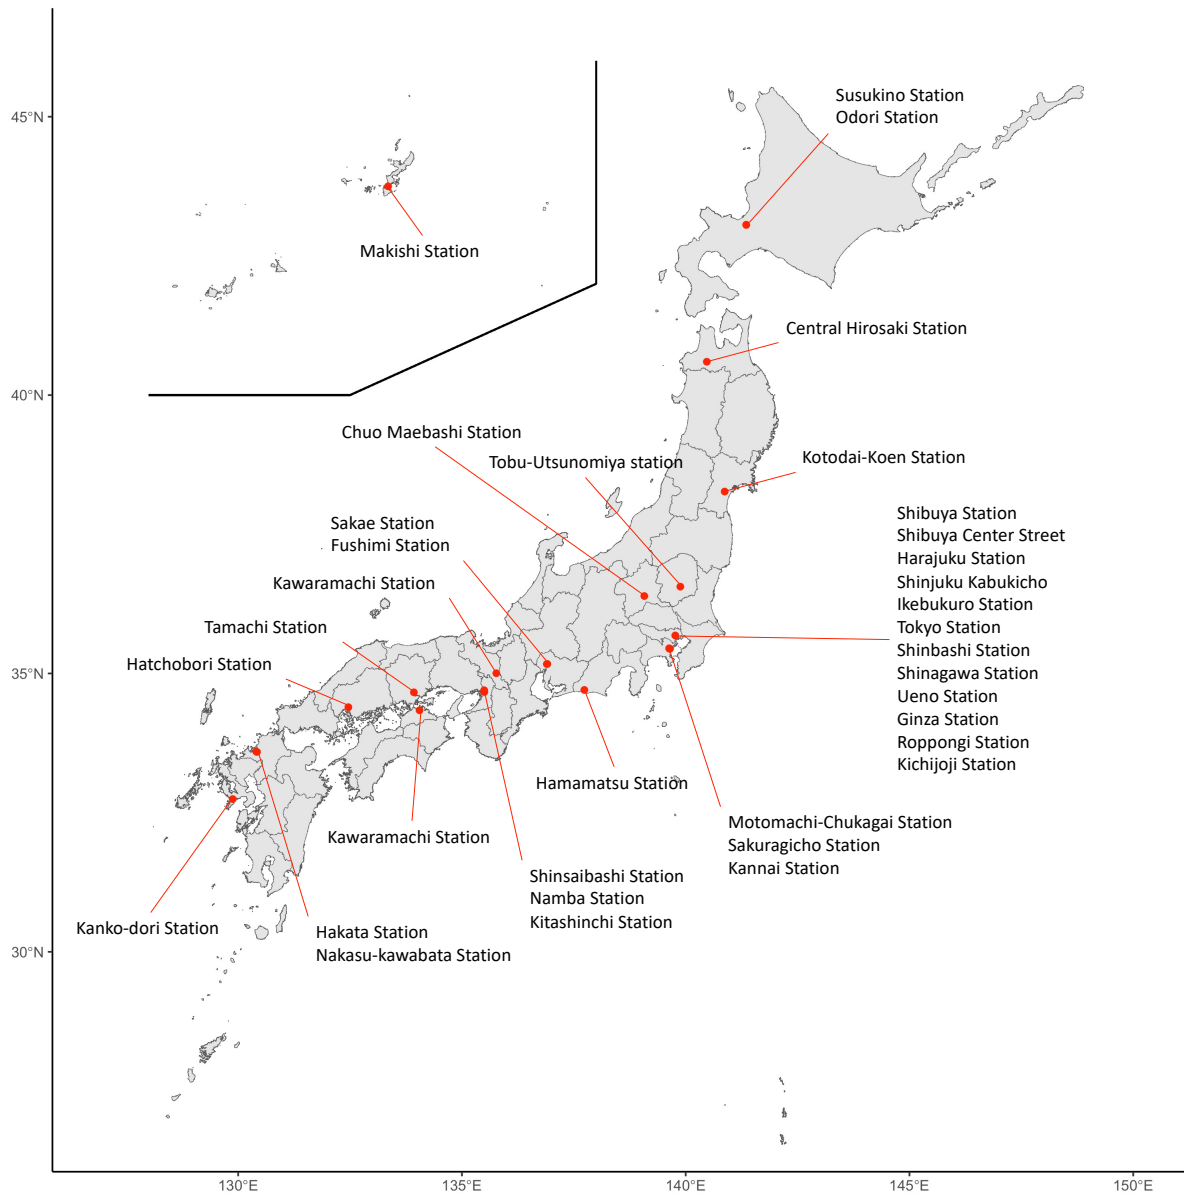

**Figure S2: Temporal trends in human mobility by age groups and time frames in other areas.** The top five graphs show the ratio of the rolling seven-day daily average of the total population based on different time frames, and the last one is a graph of the daily number of newly reported COVID-19 cases. Gray areas indicate a state of emergency.





# Namba Station, Osaka

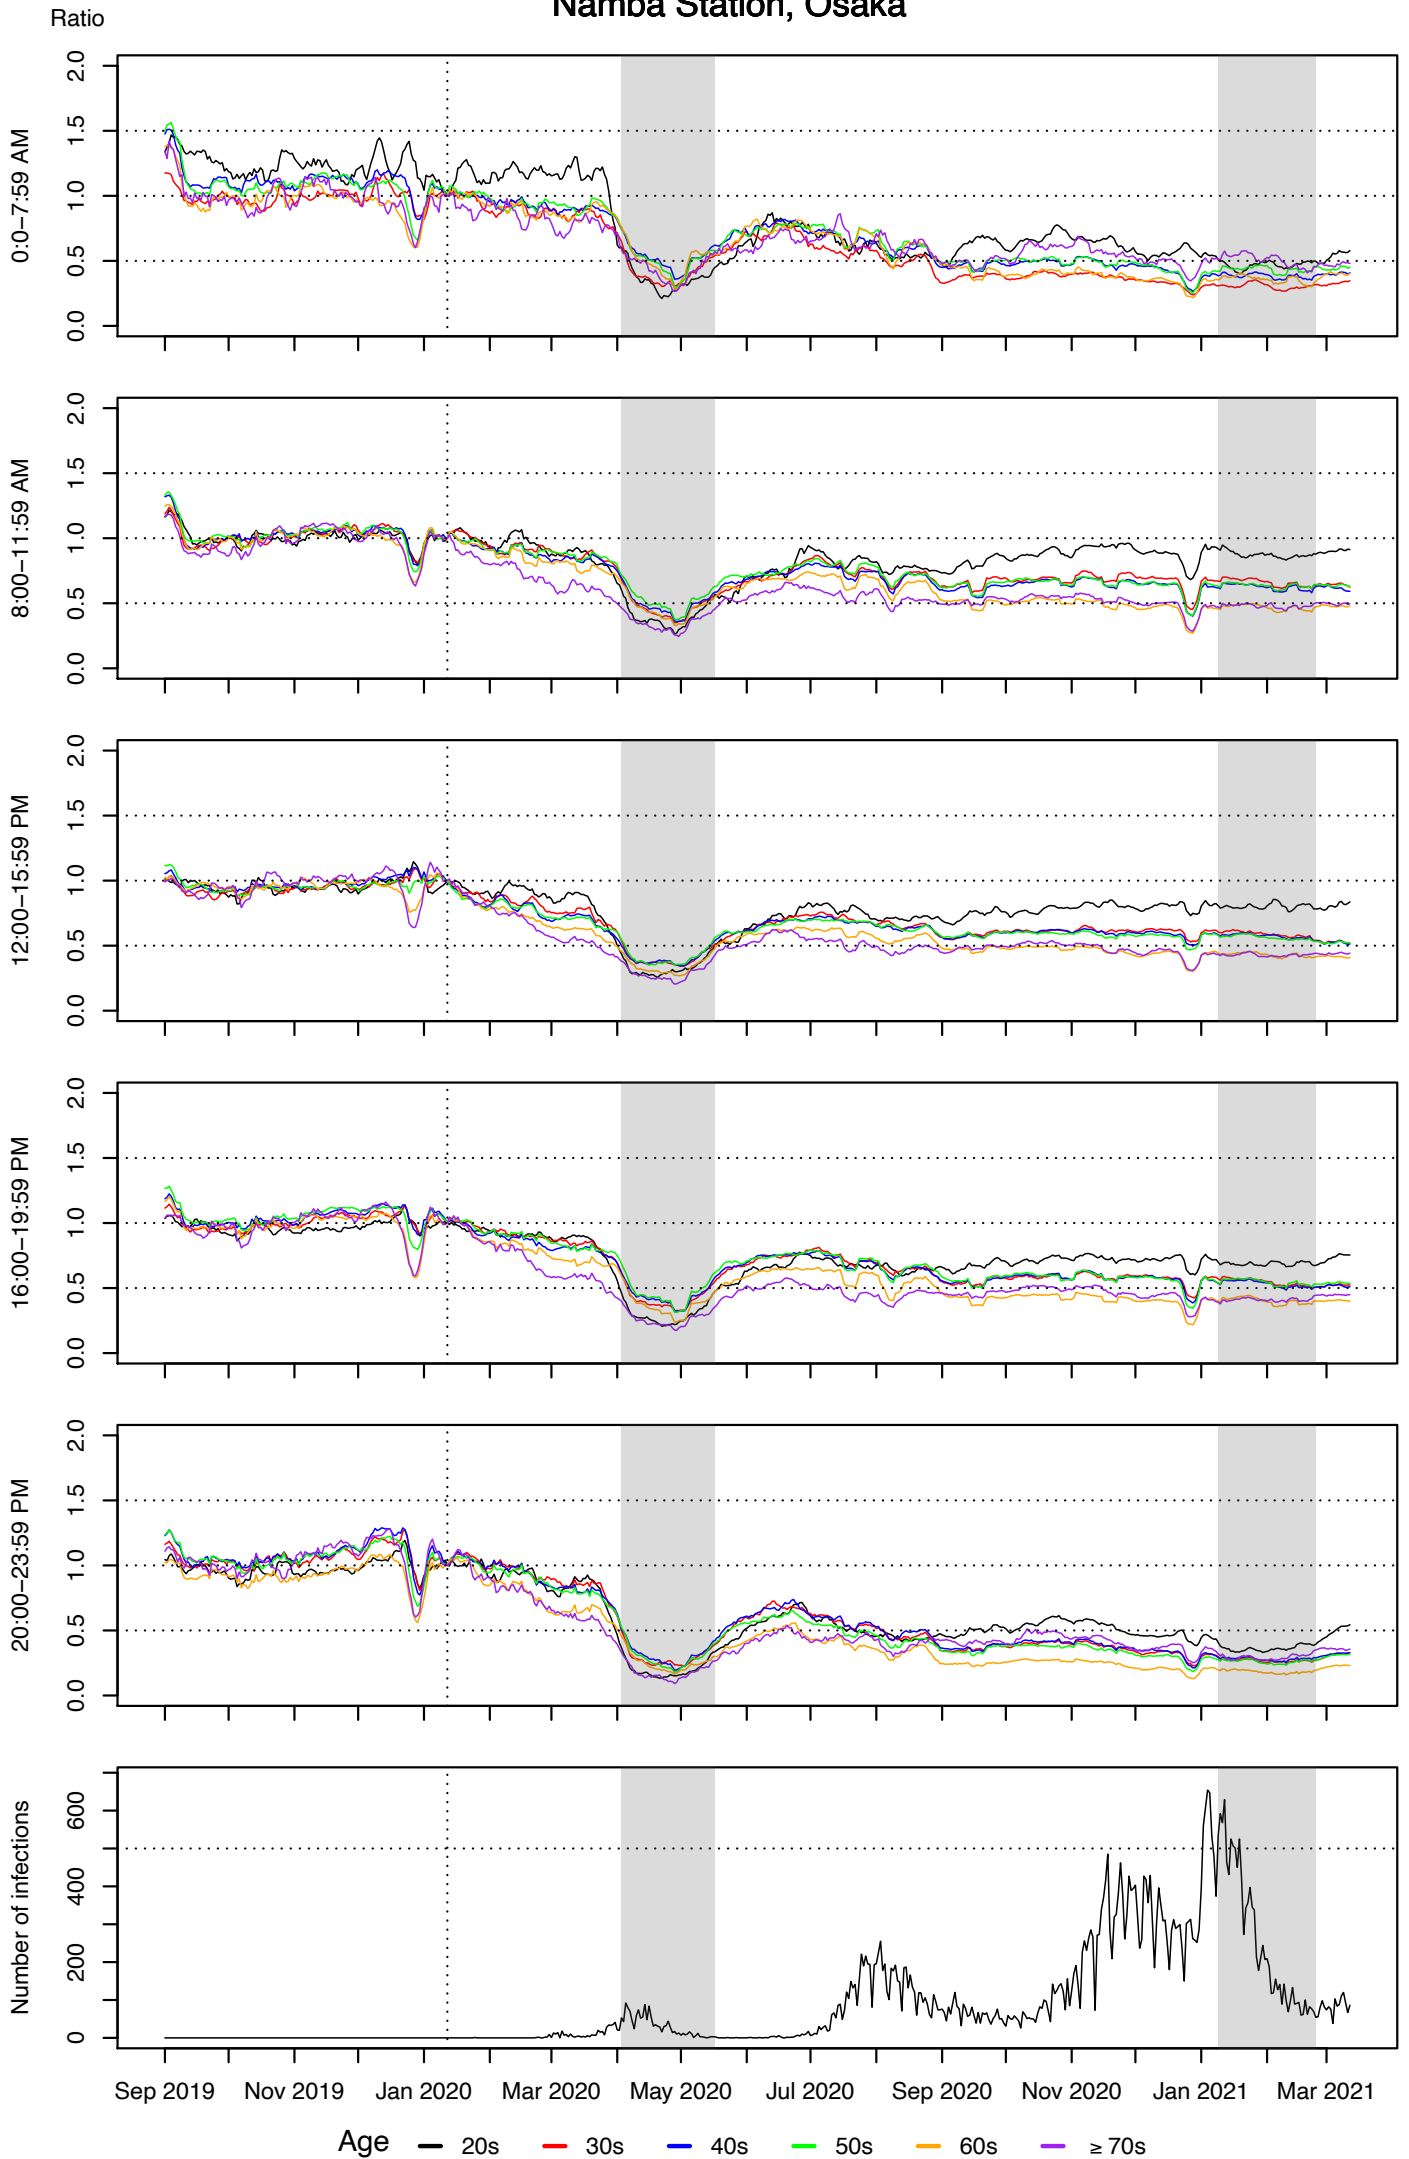

# Ueno Station, Tokyo

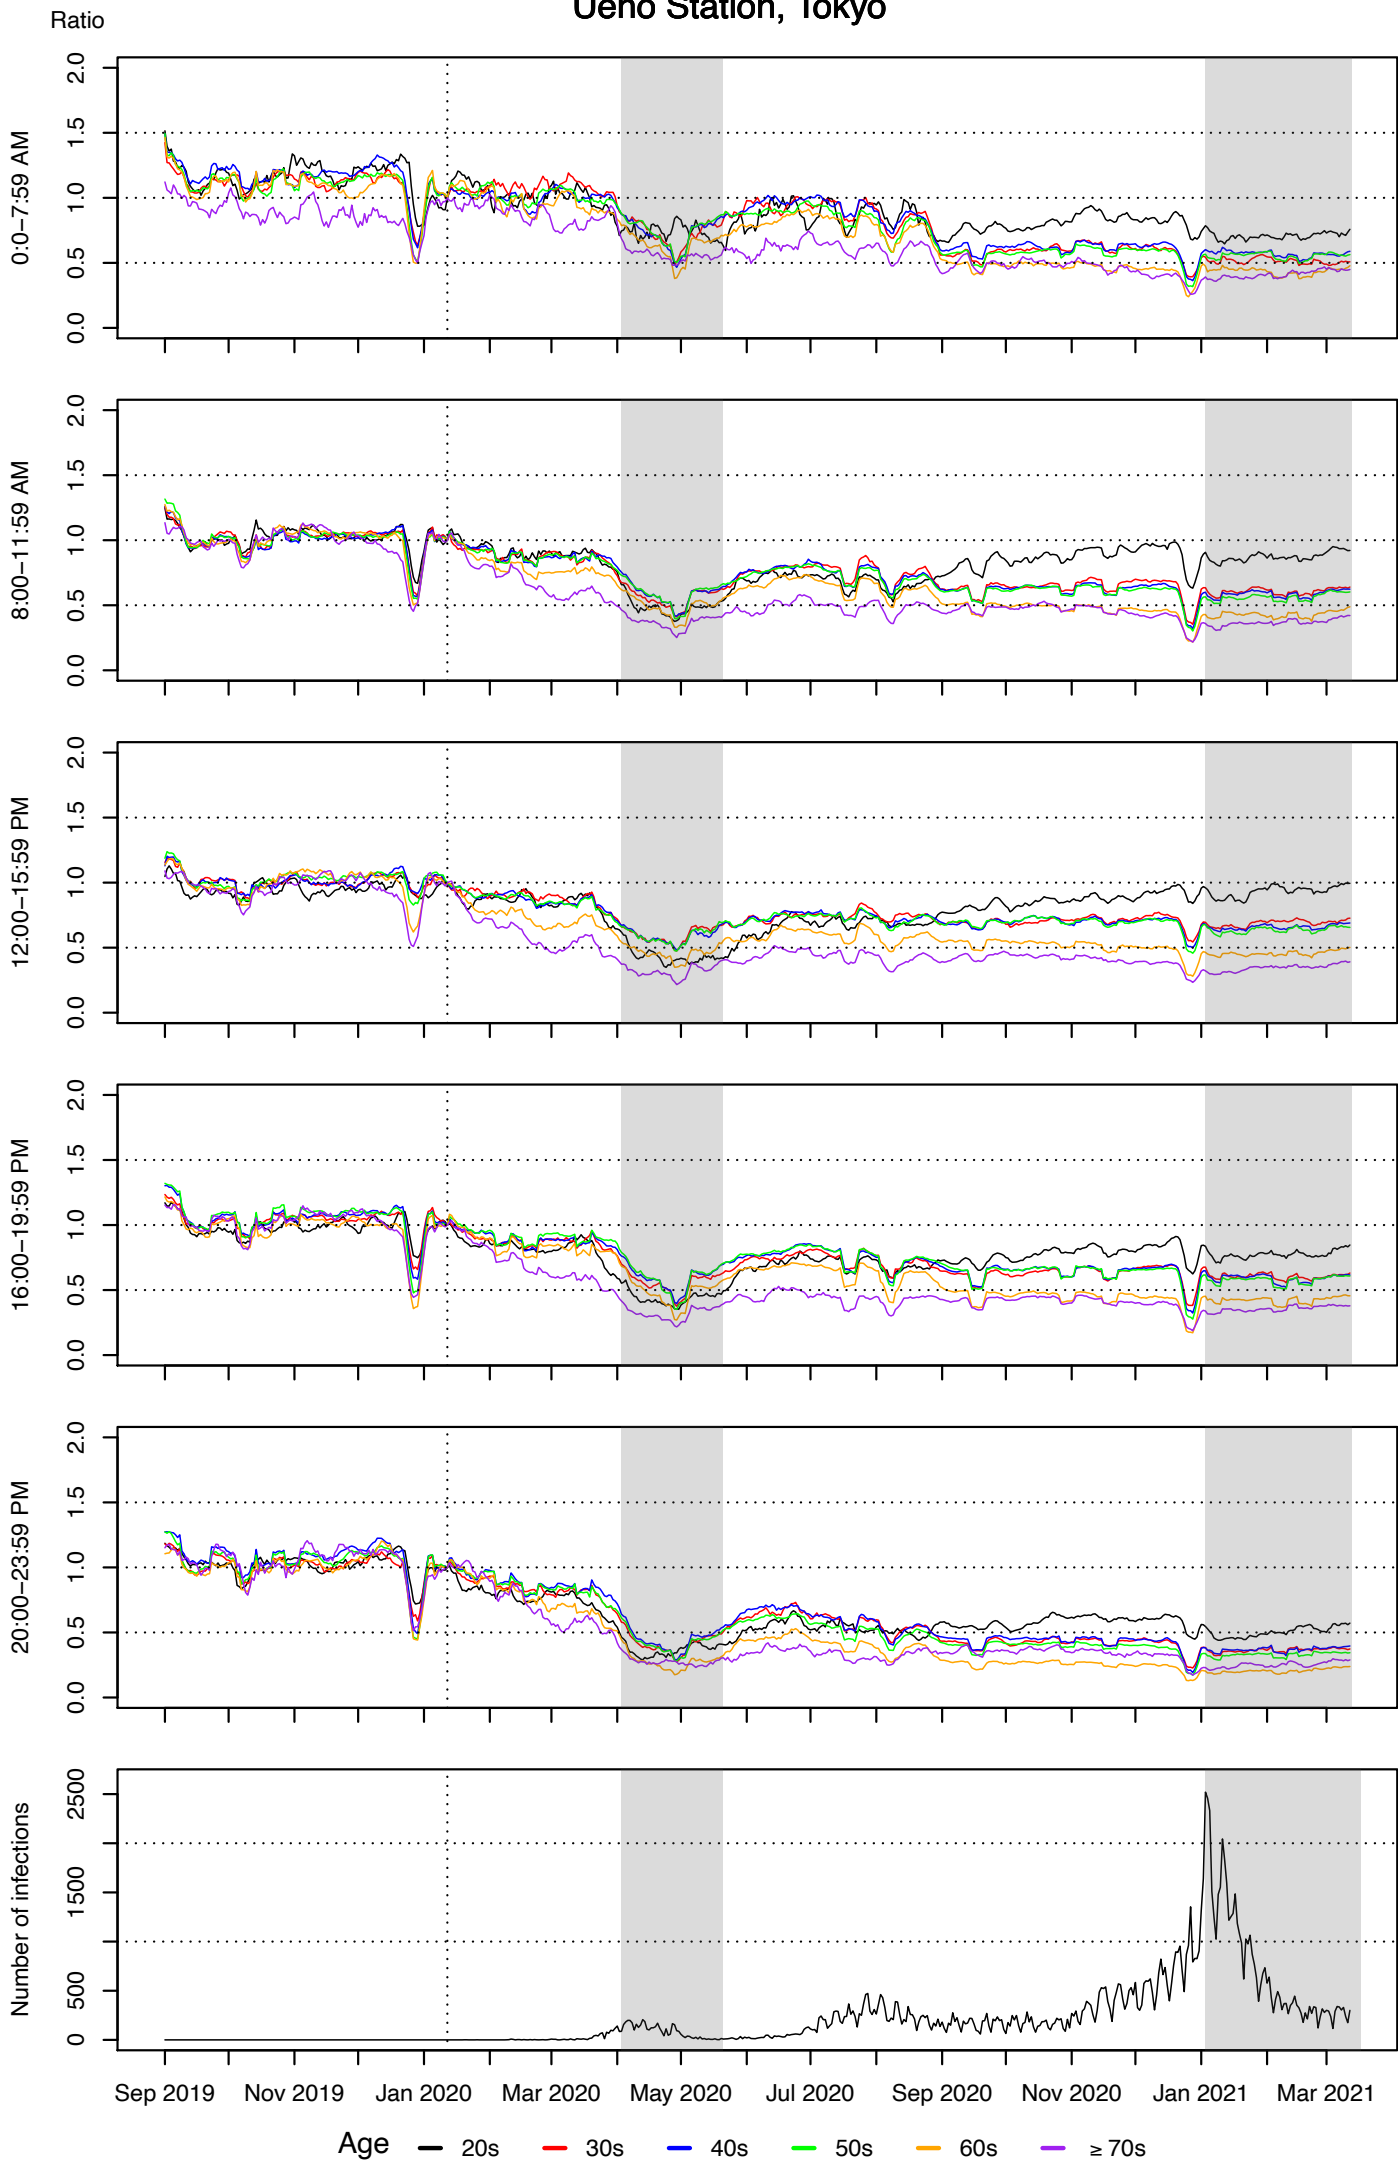

# Chuo Maebashi Station, Gunma

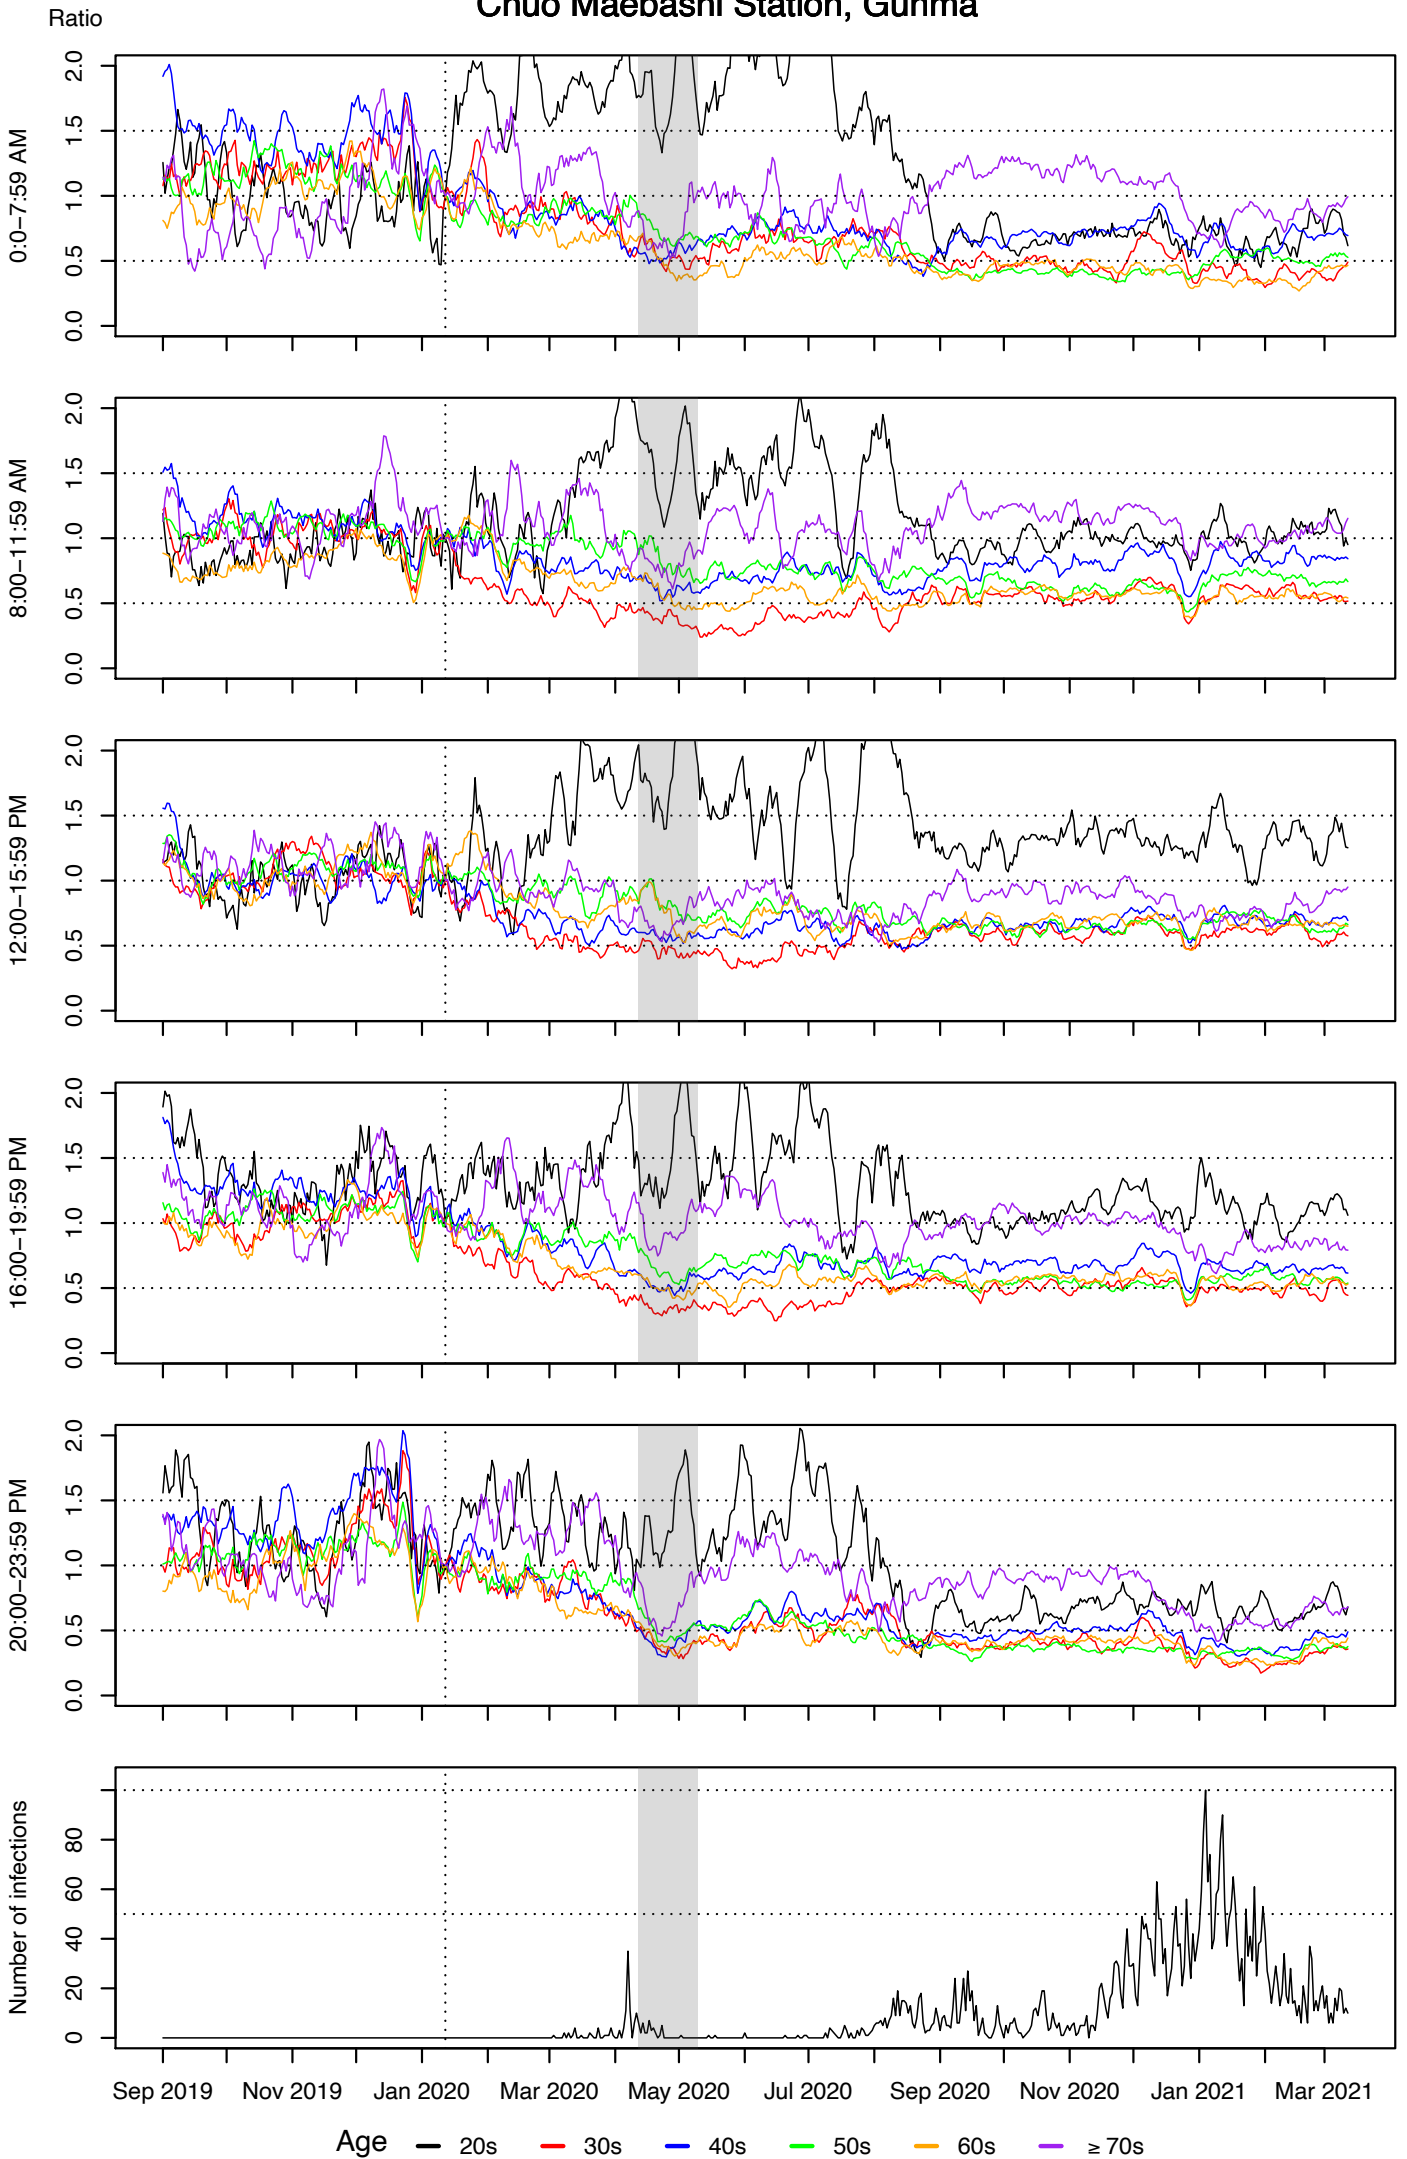

# Central Hirosaki Station, Aomori

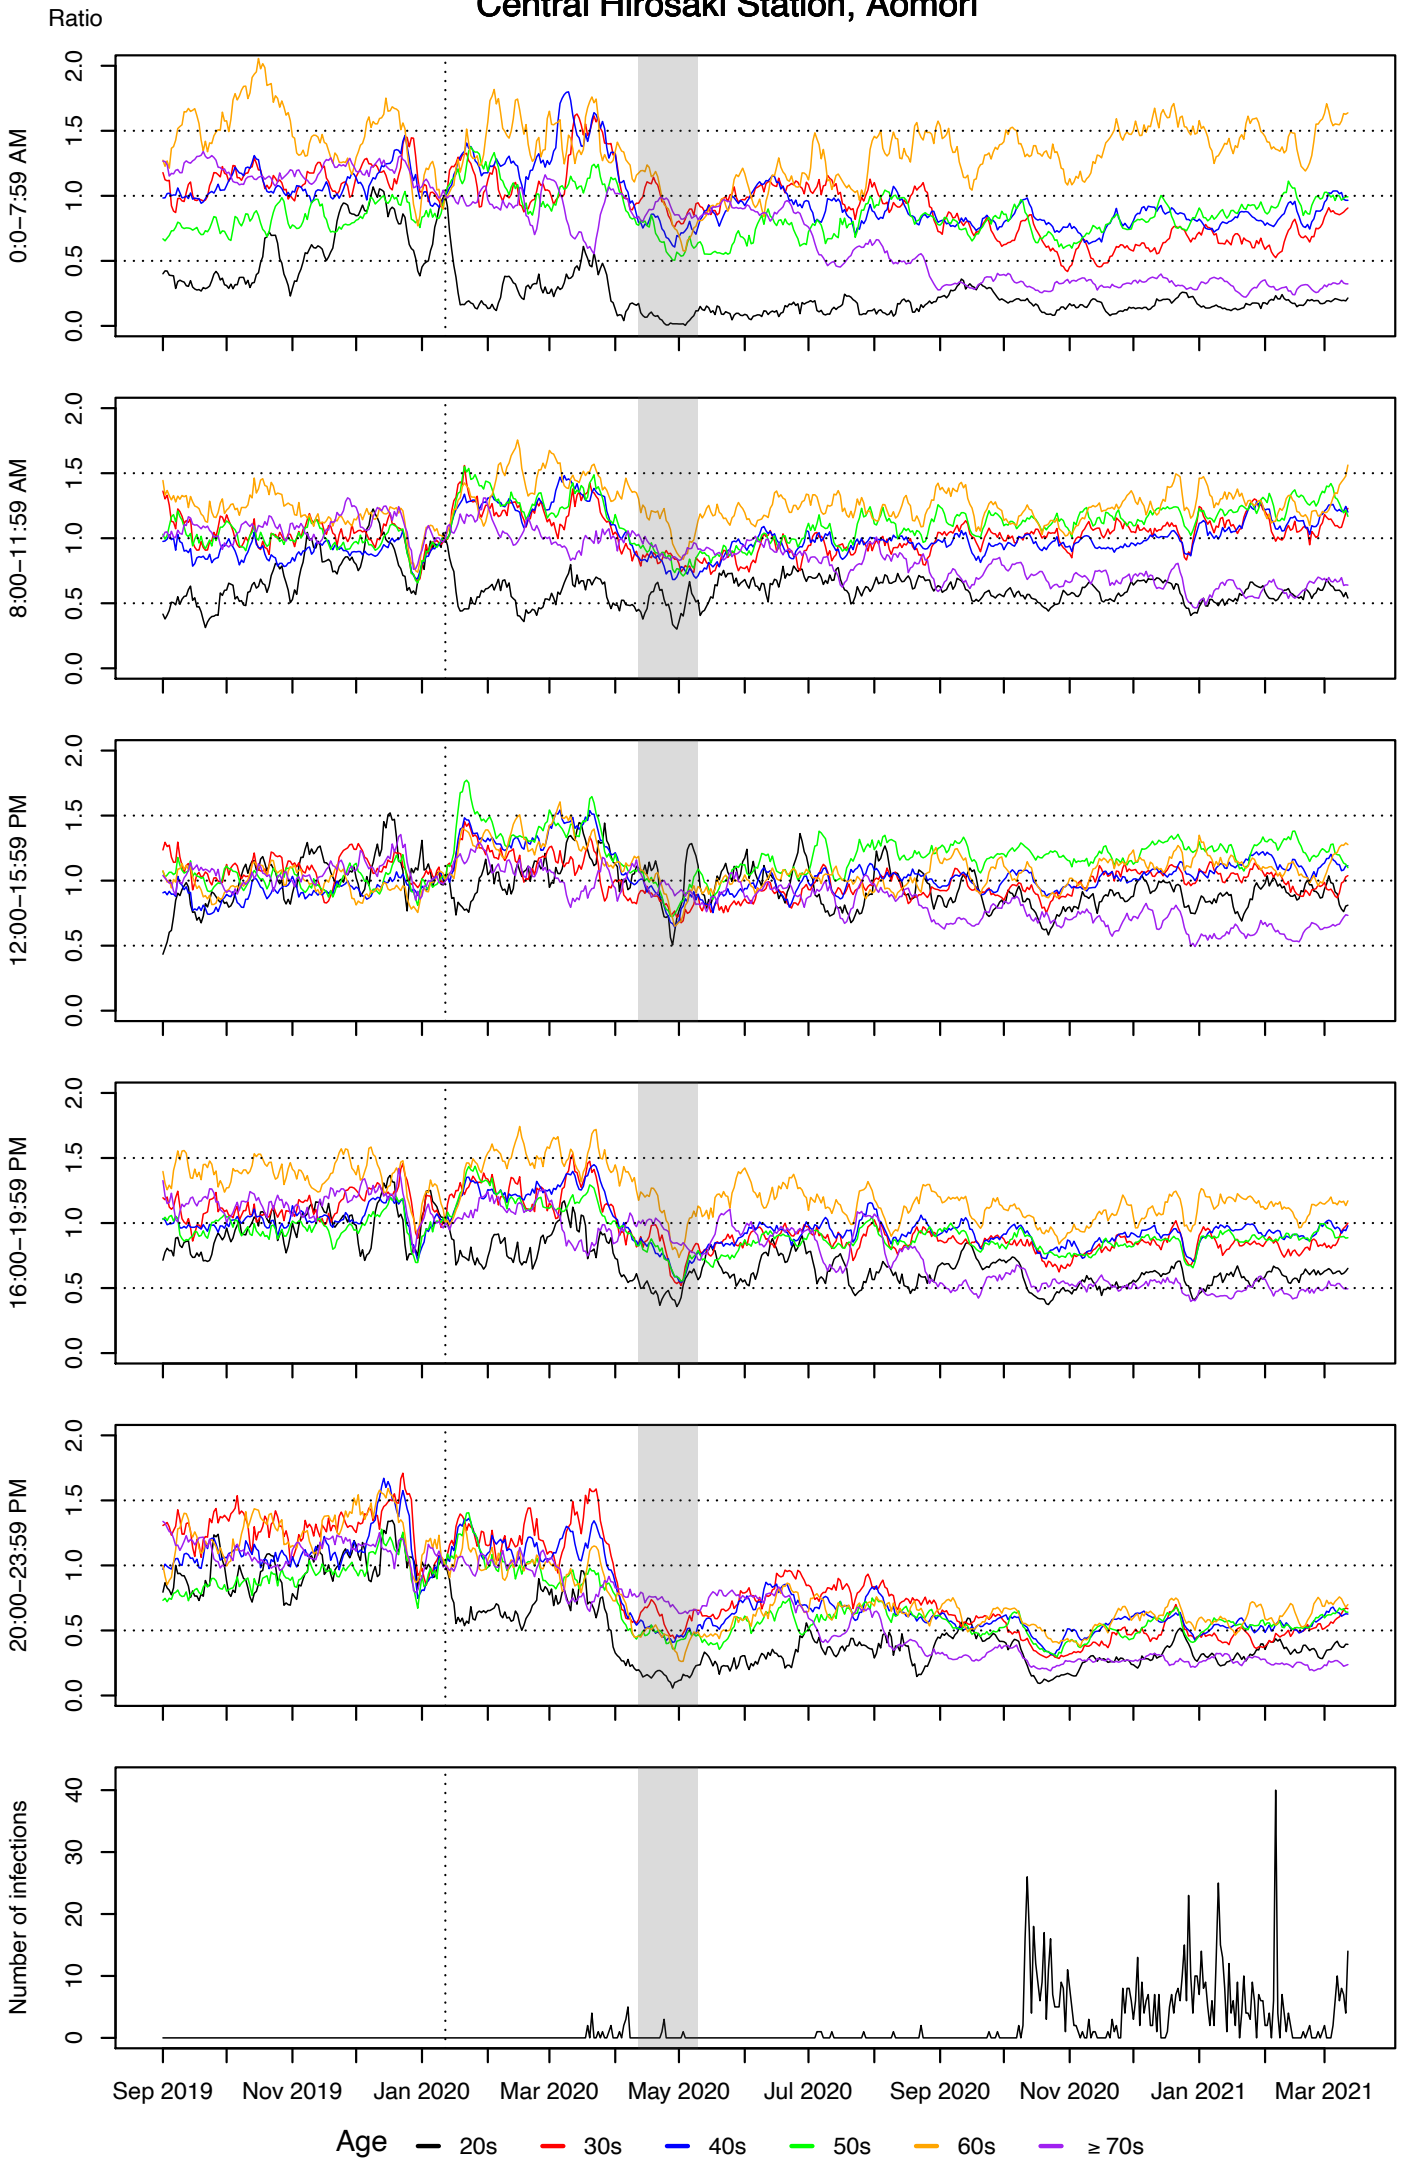

# Nakasu-Kawabata Station, Fukuoka

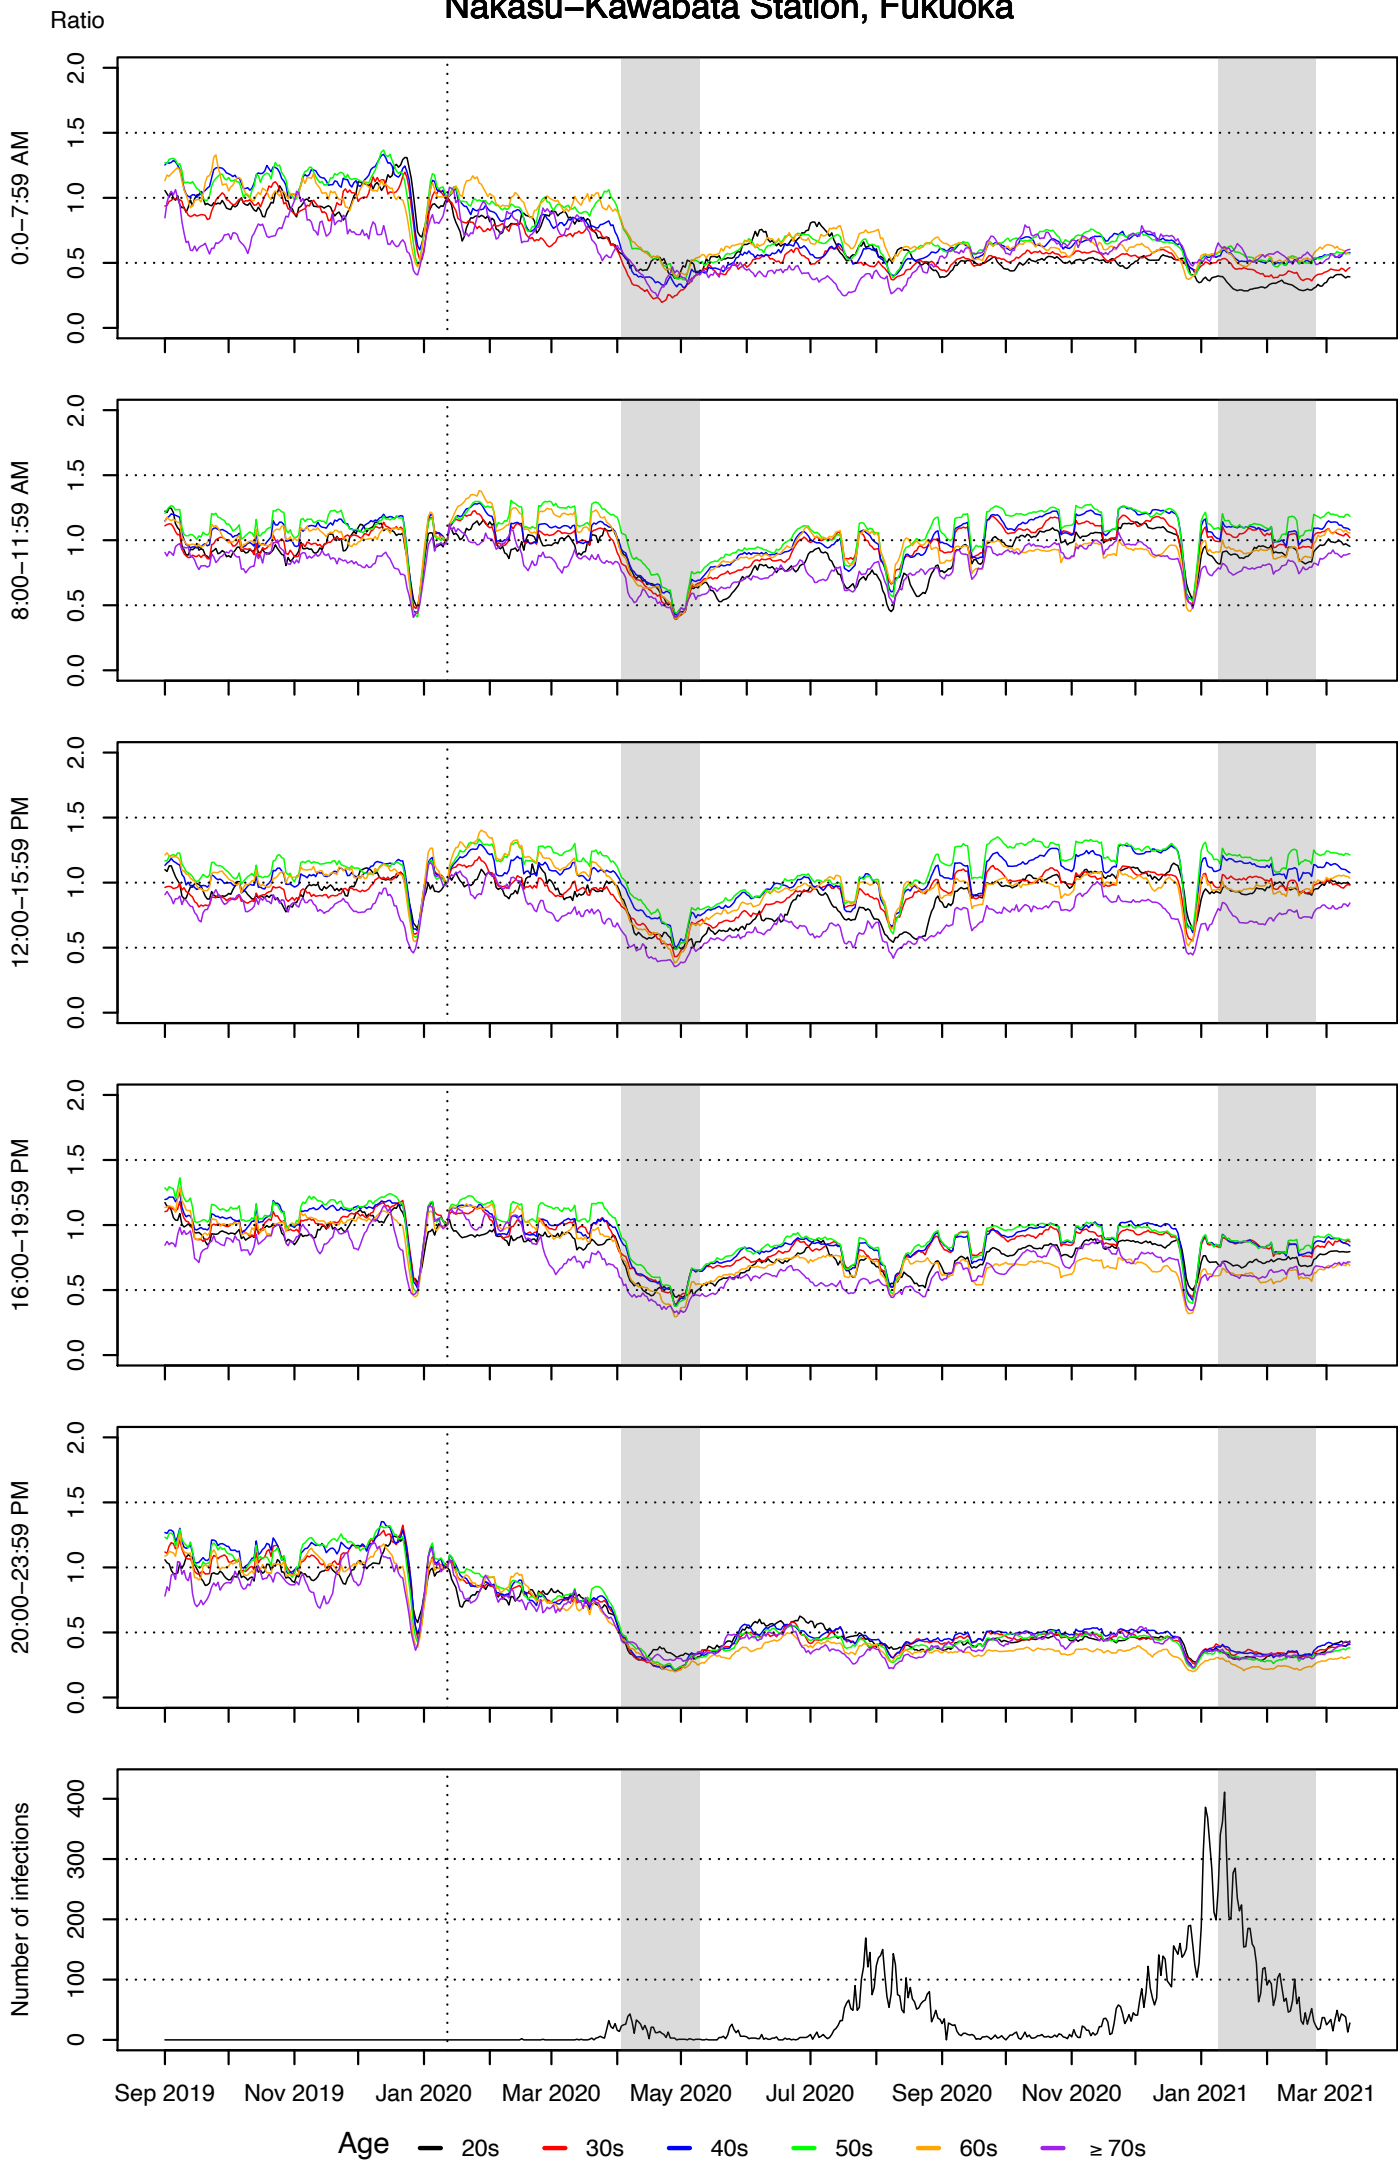



# Fushimi Station, Aichi

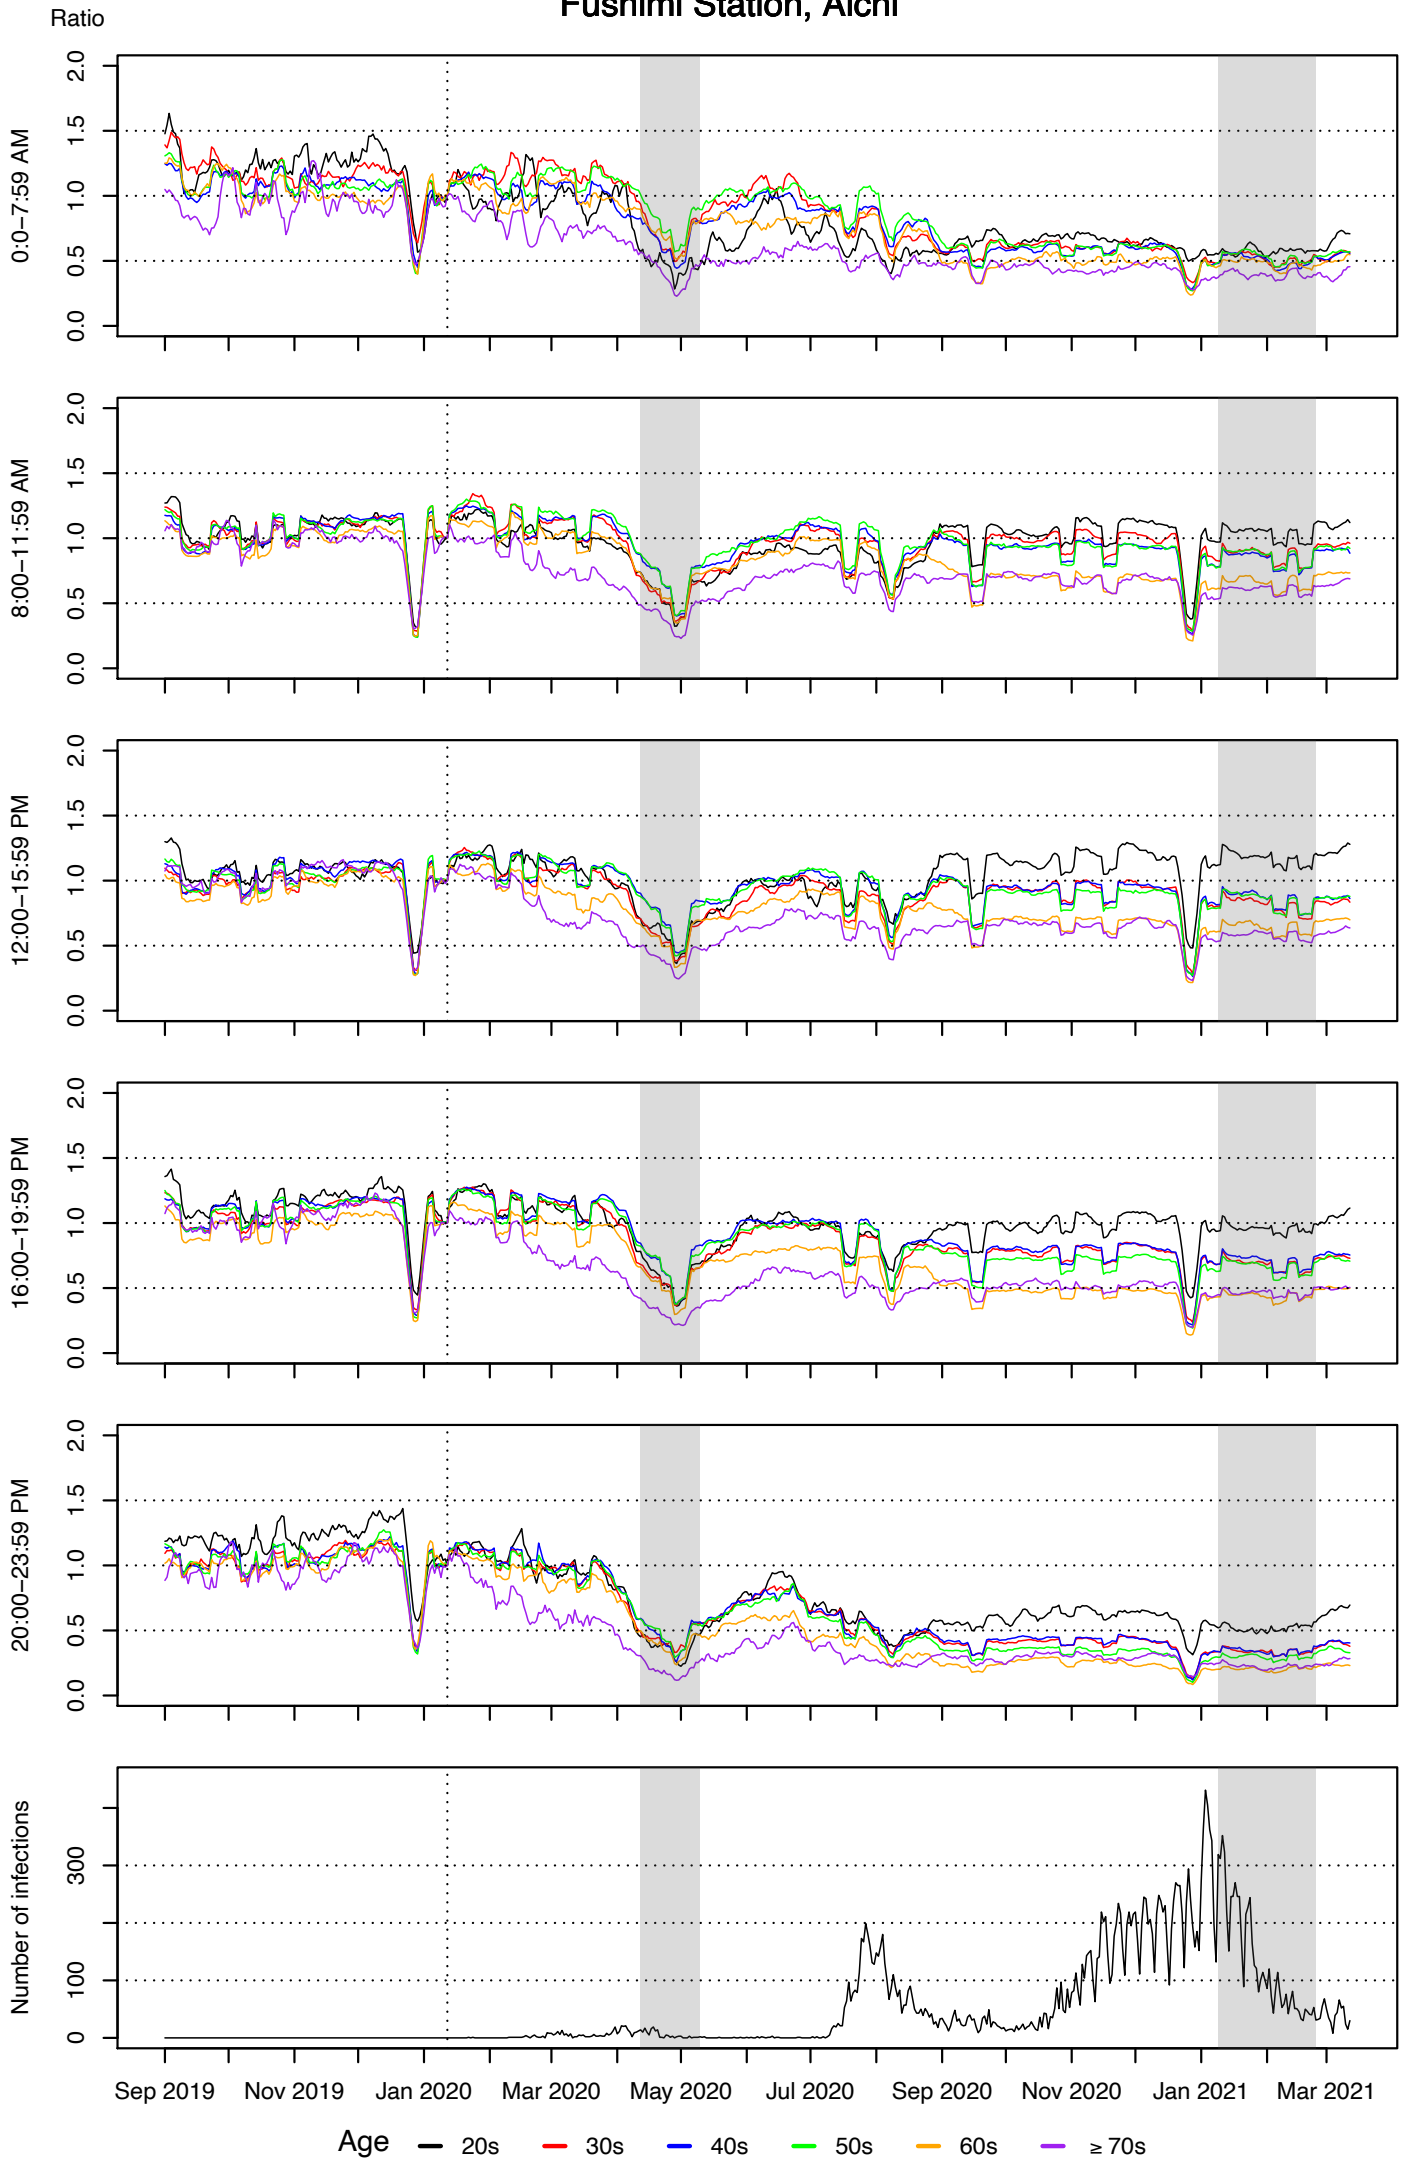

# Motomachi-Chukagai Station, Kanagawa

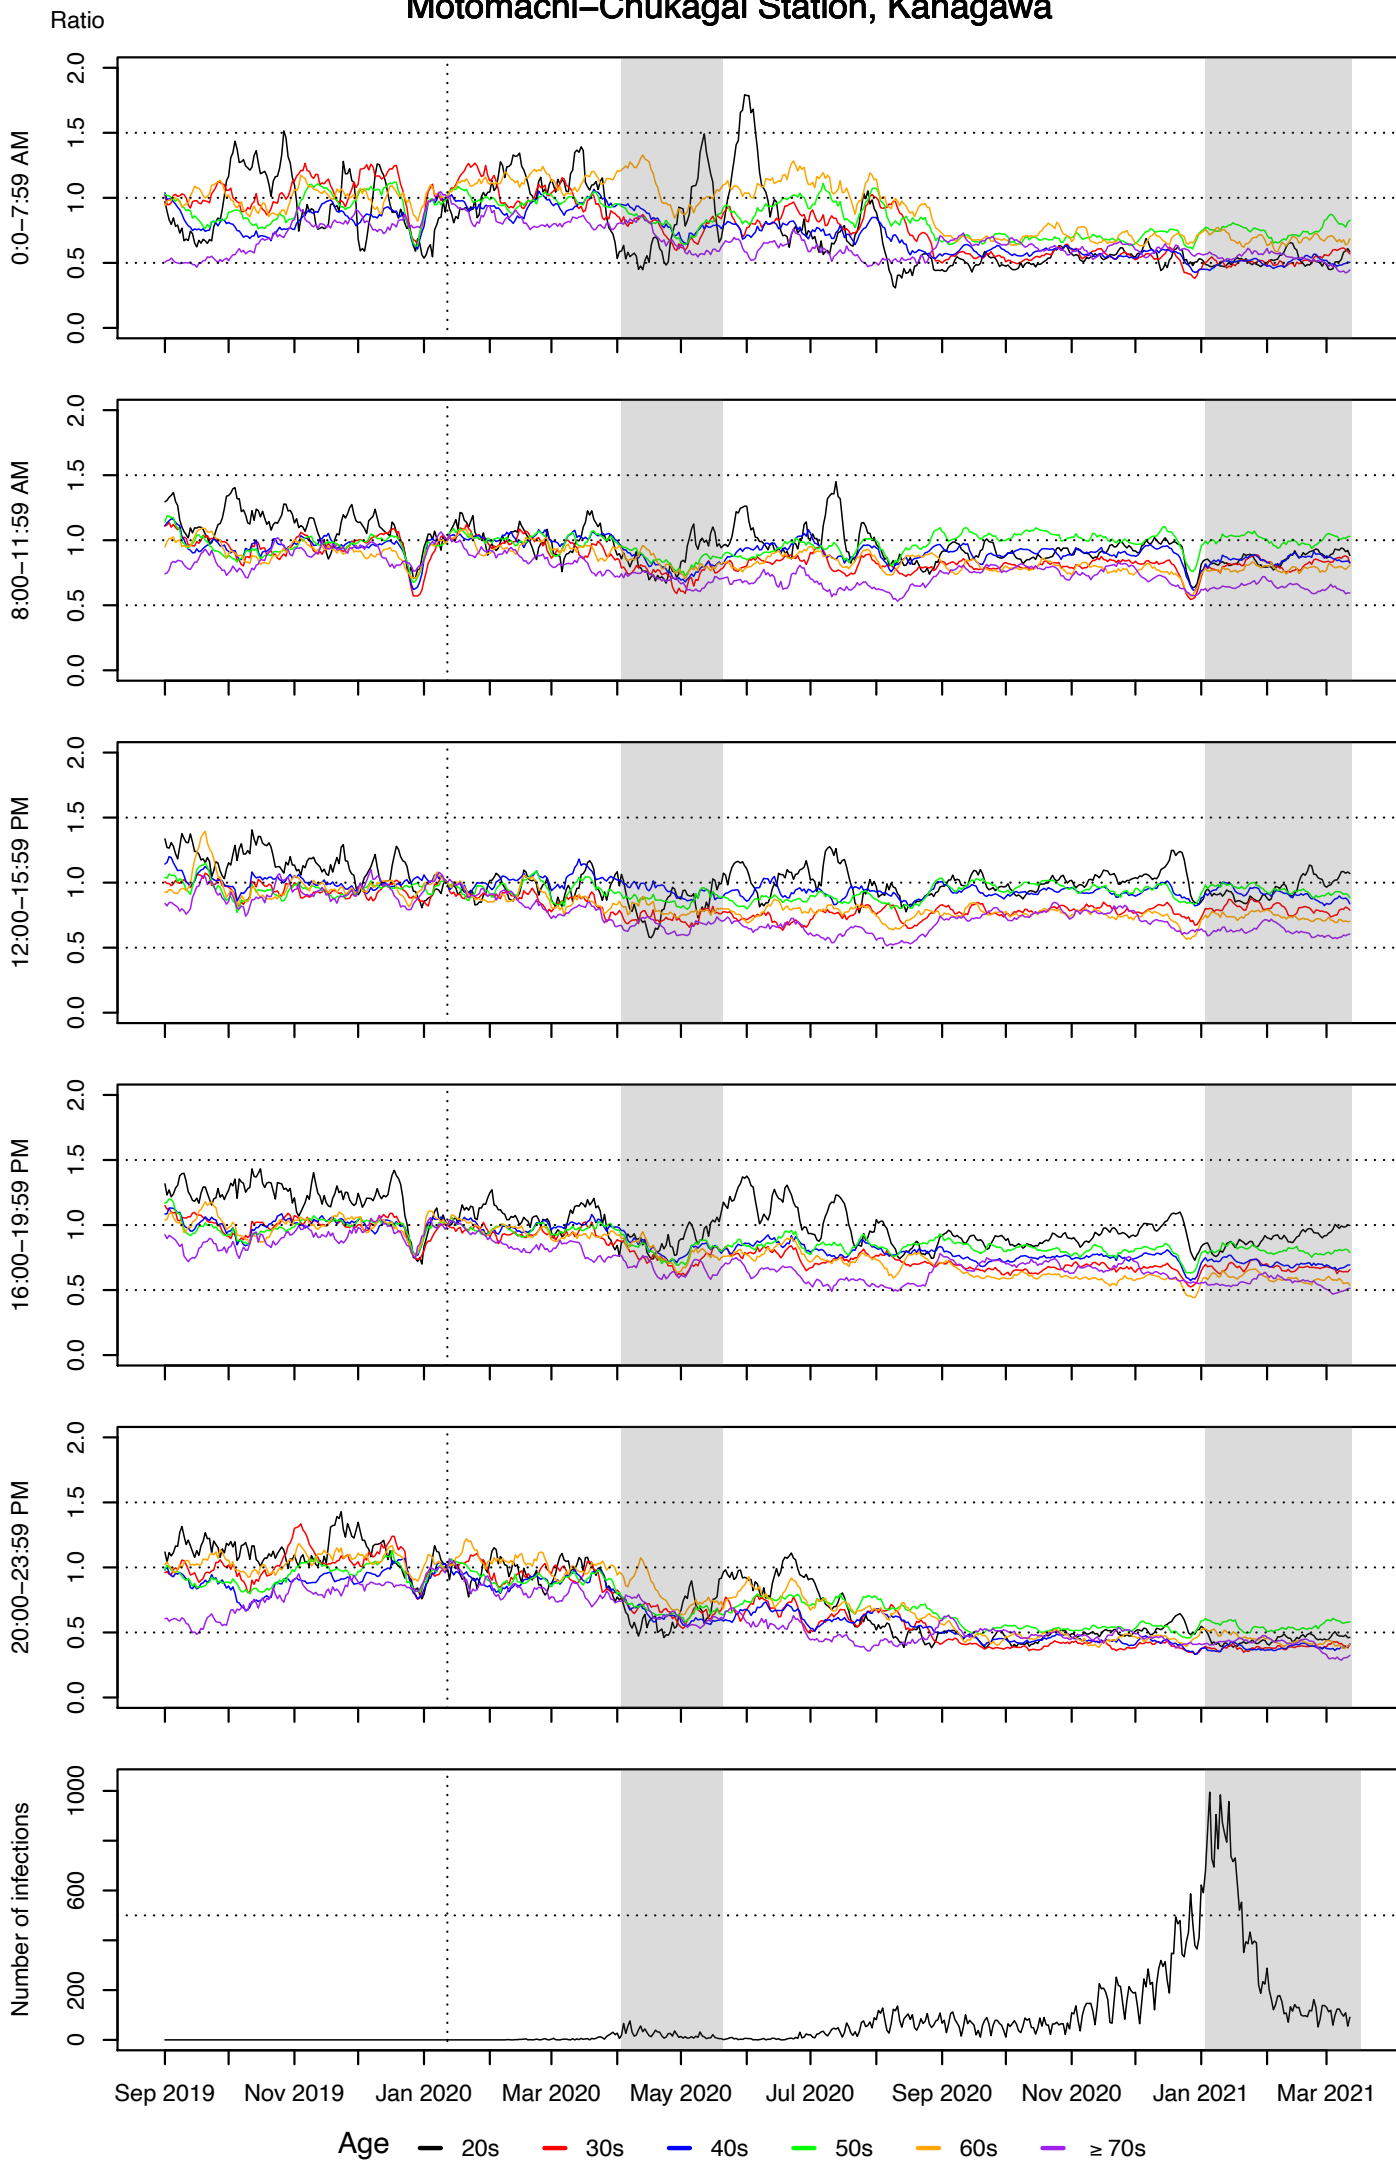



# Hatchobori Station, Hiroshima

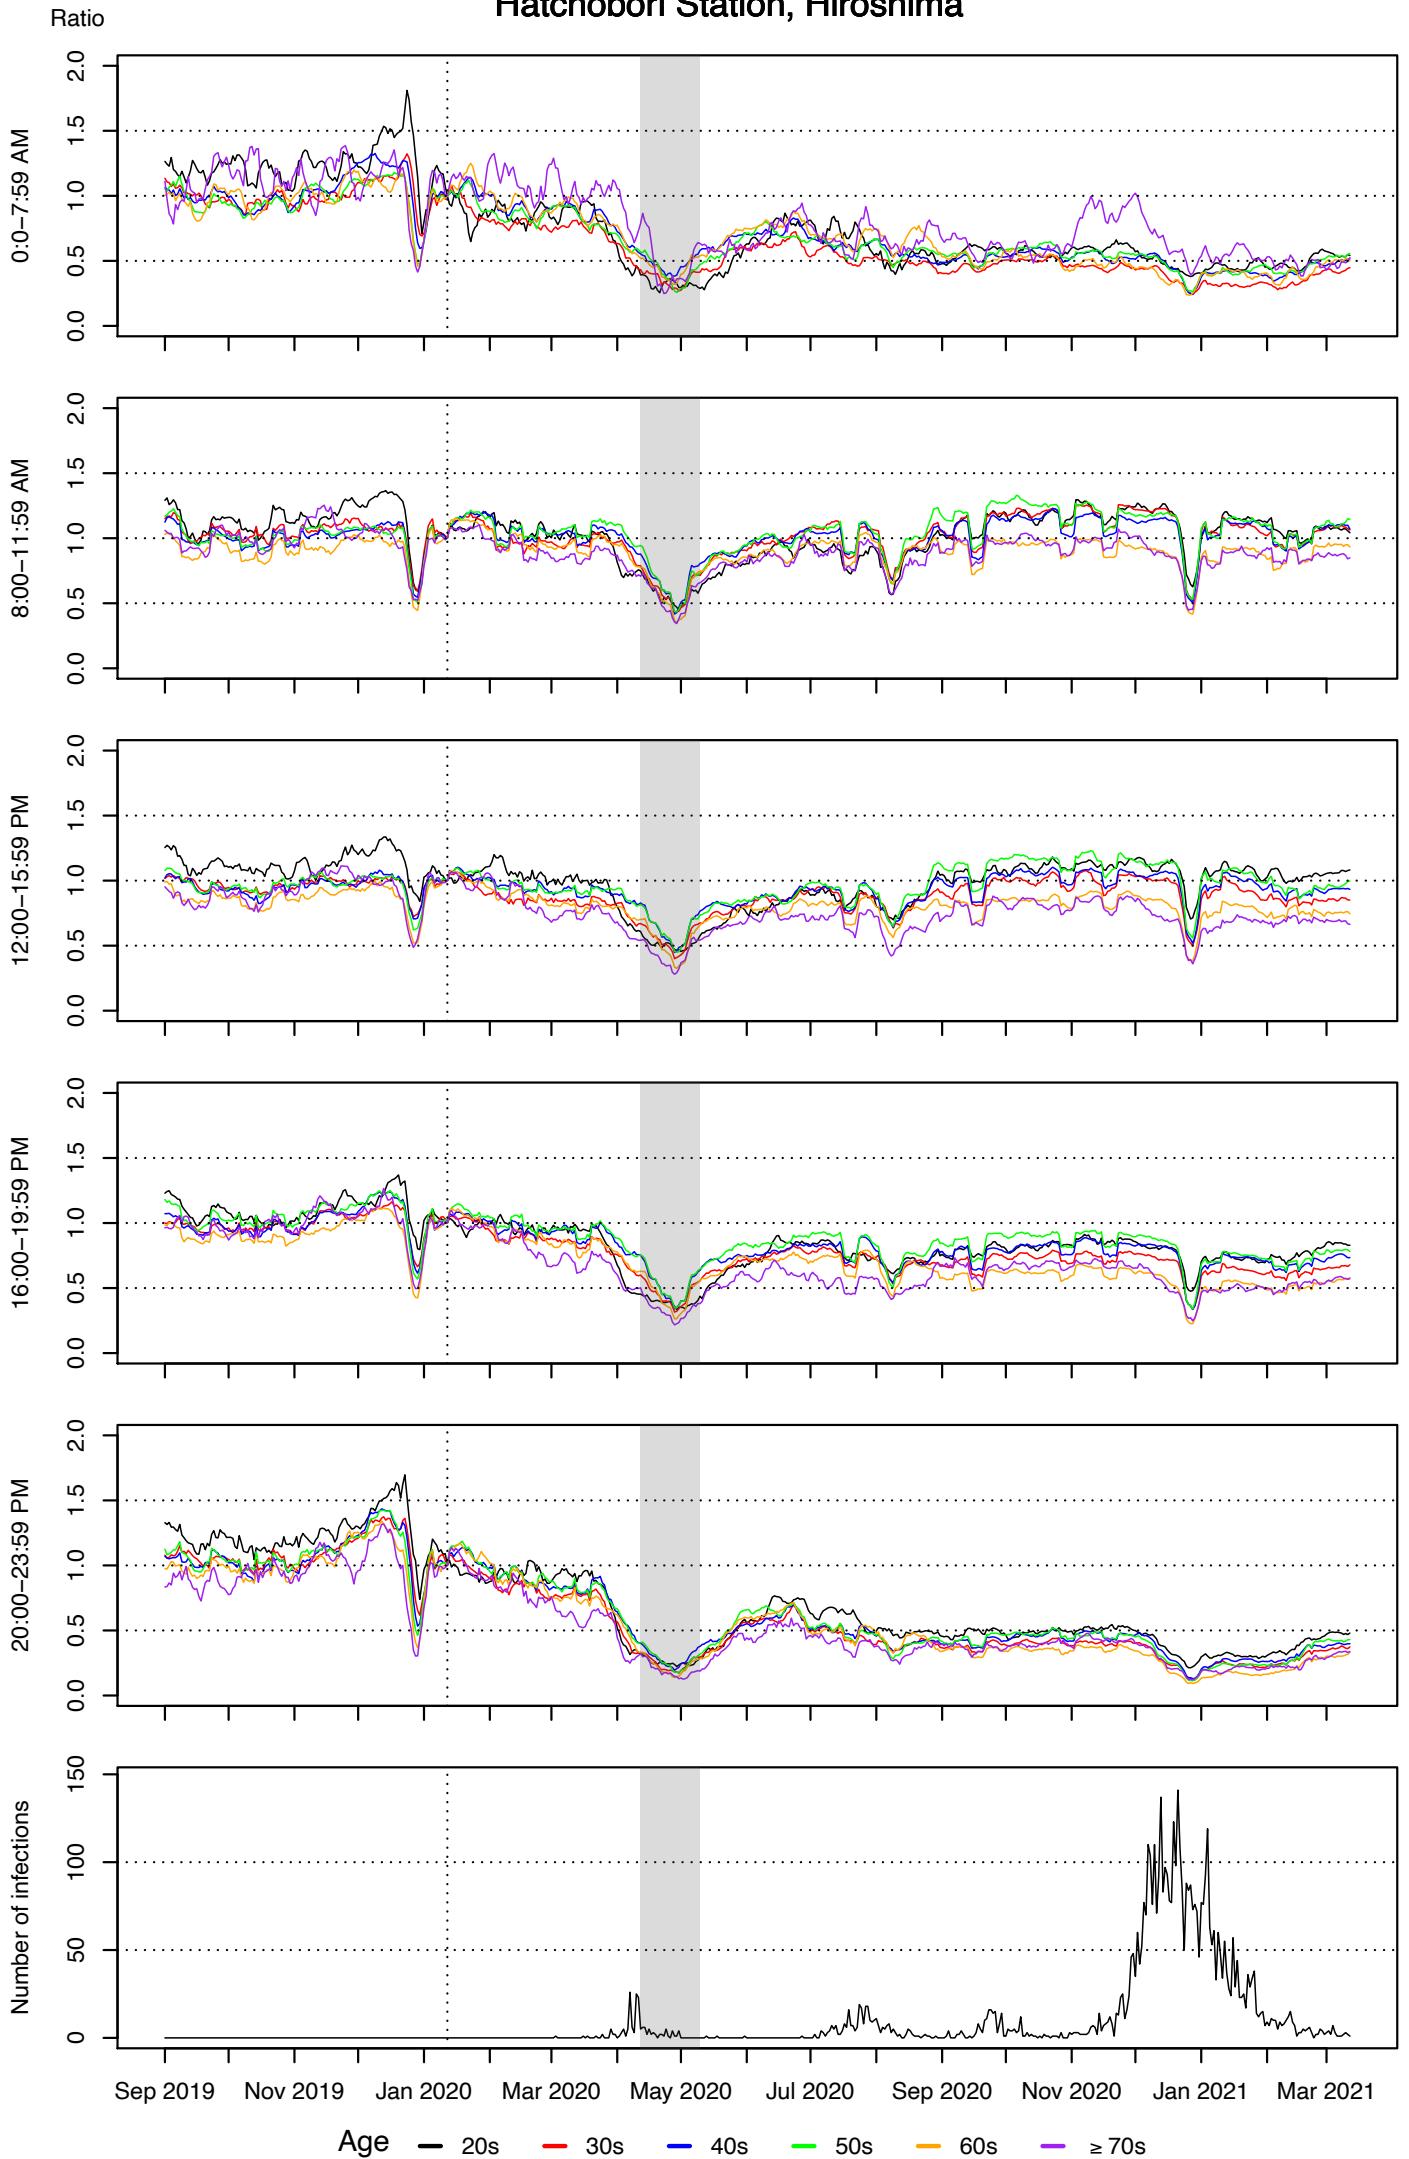

# Roppongi Station, Tokyo

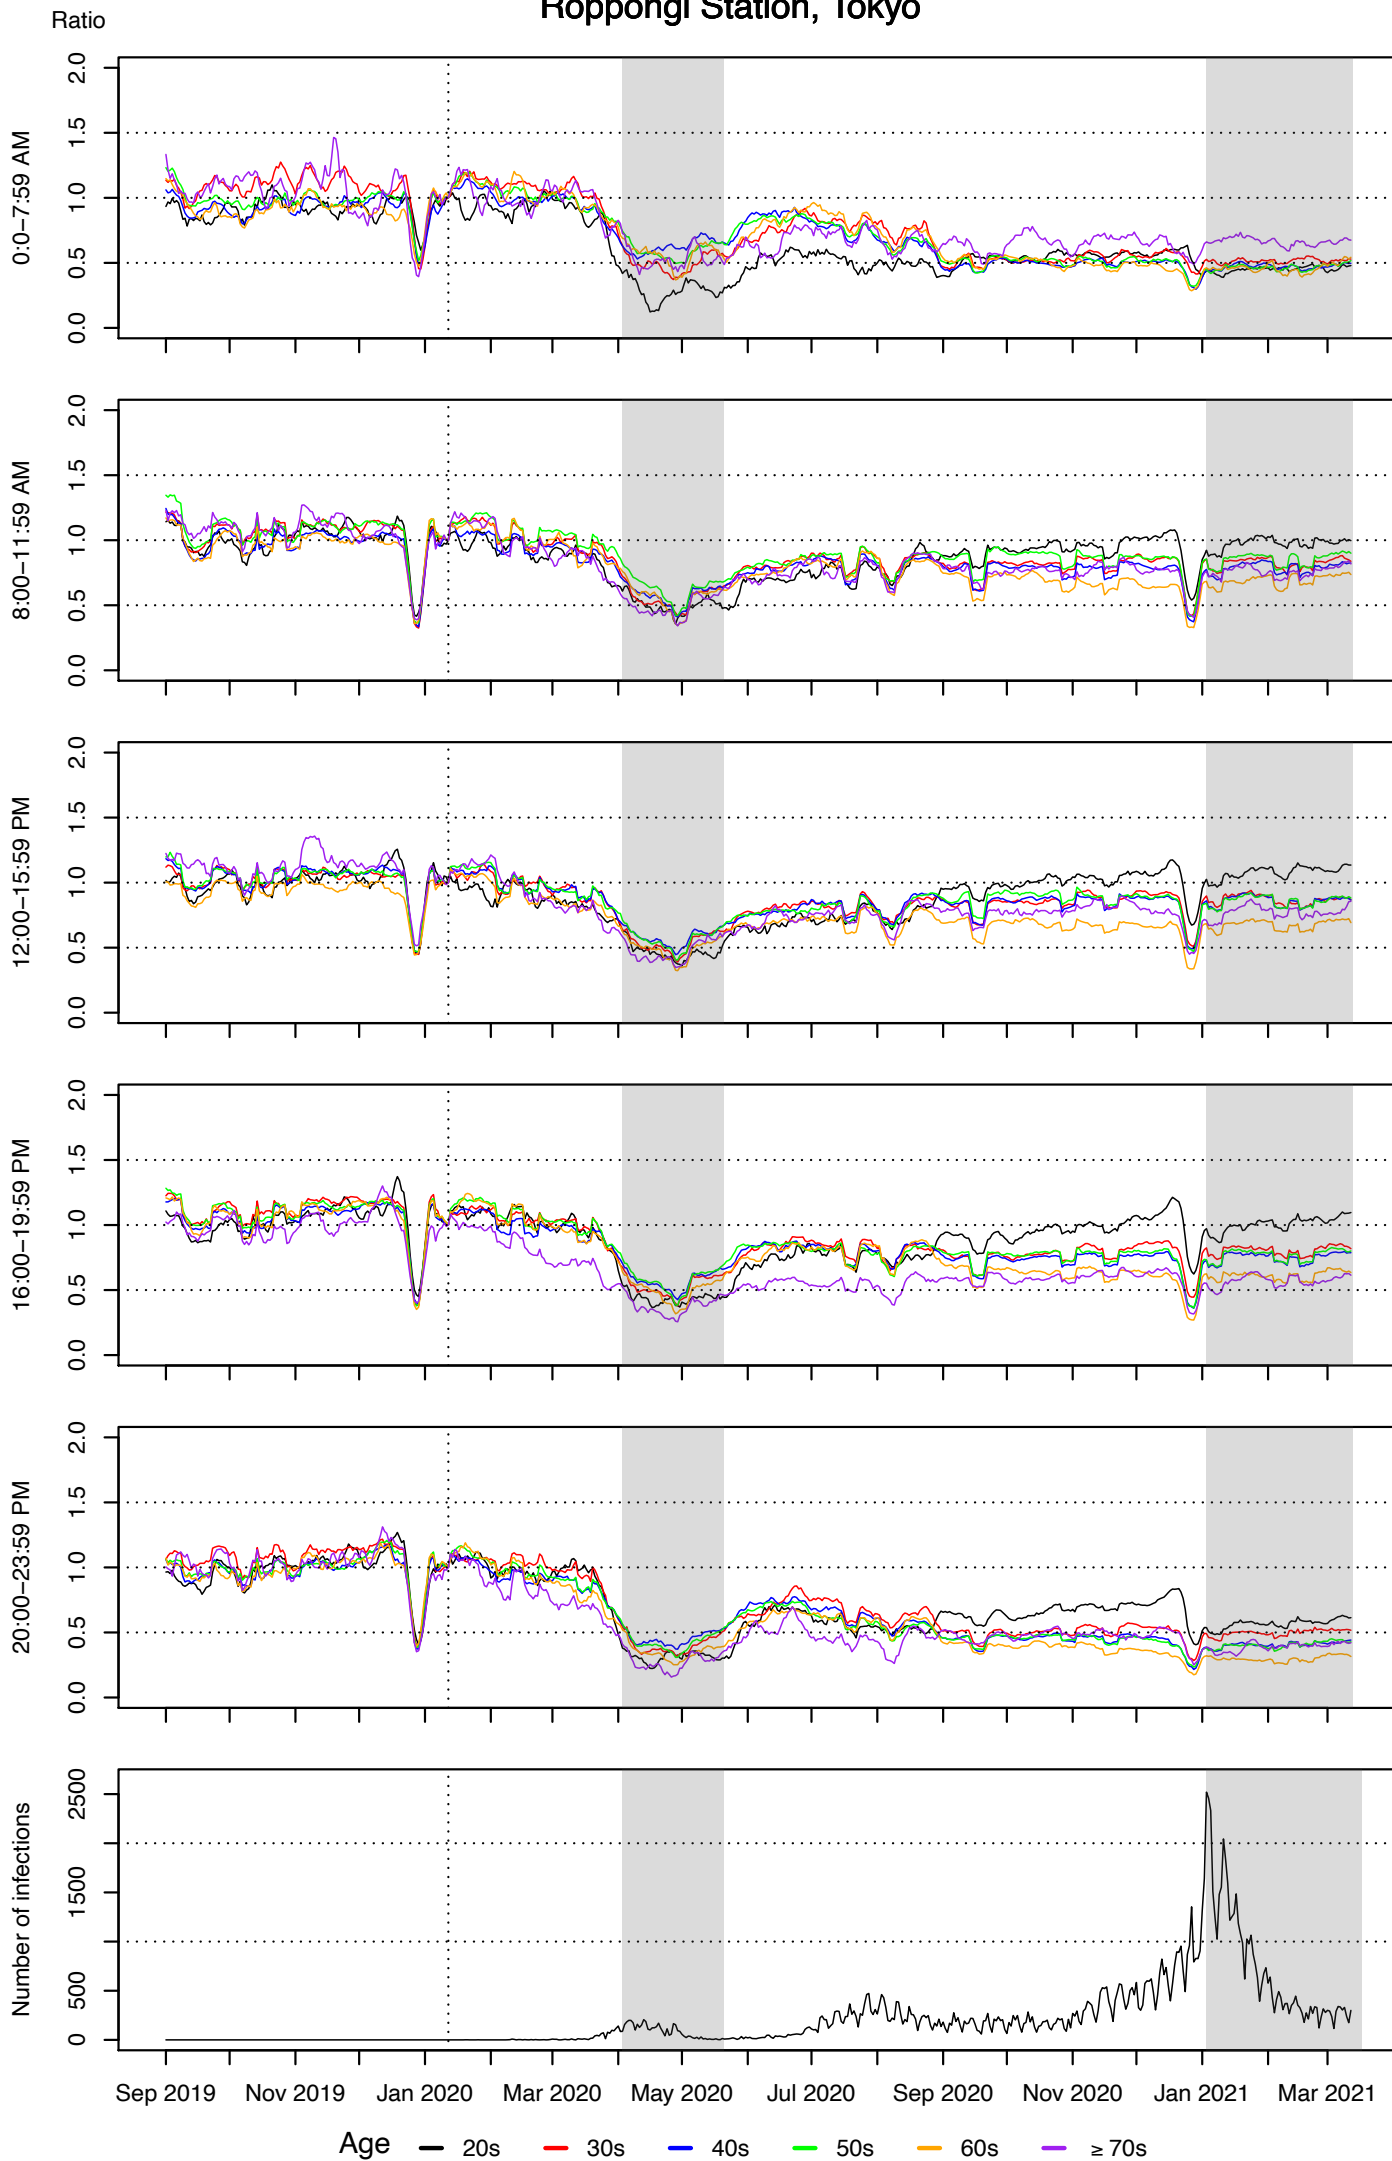

# Kotodai-Koen Station, Miyagi

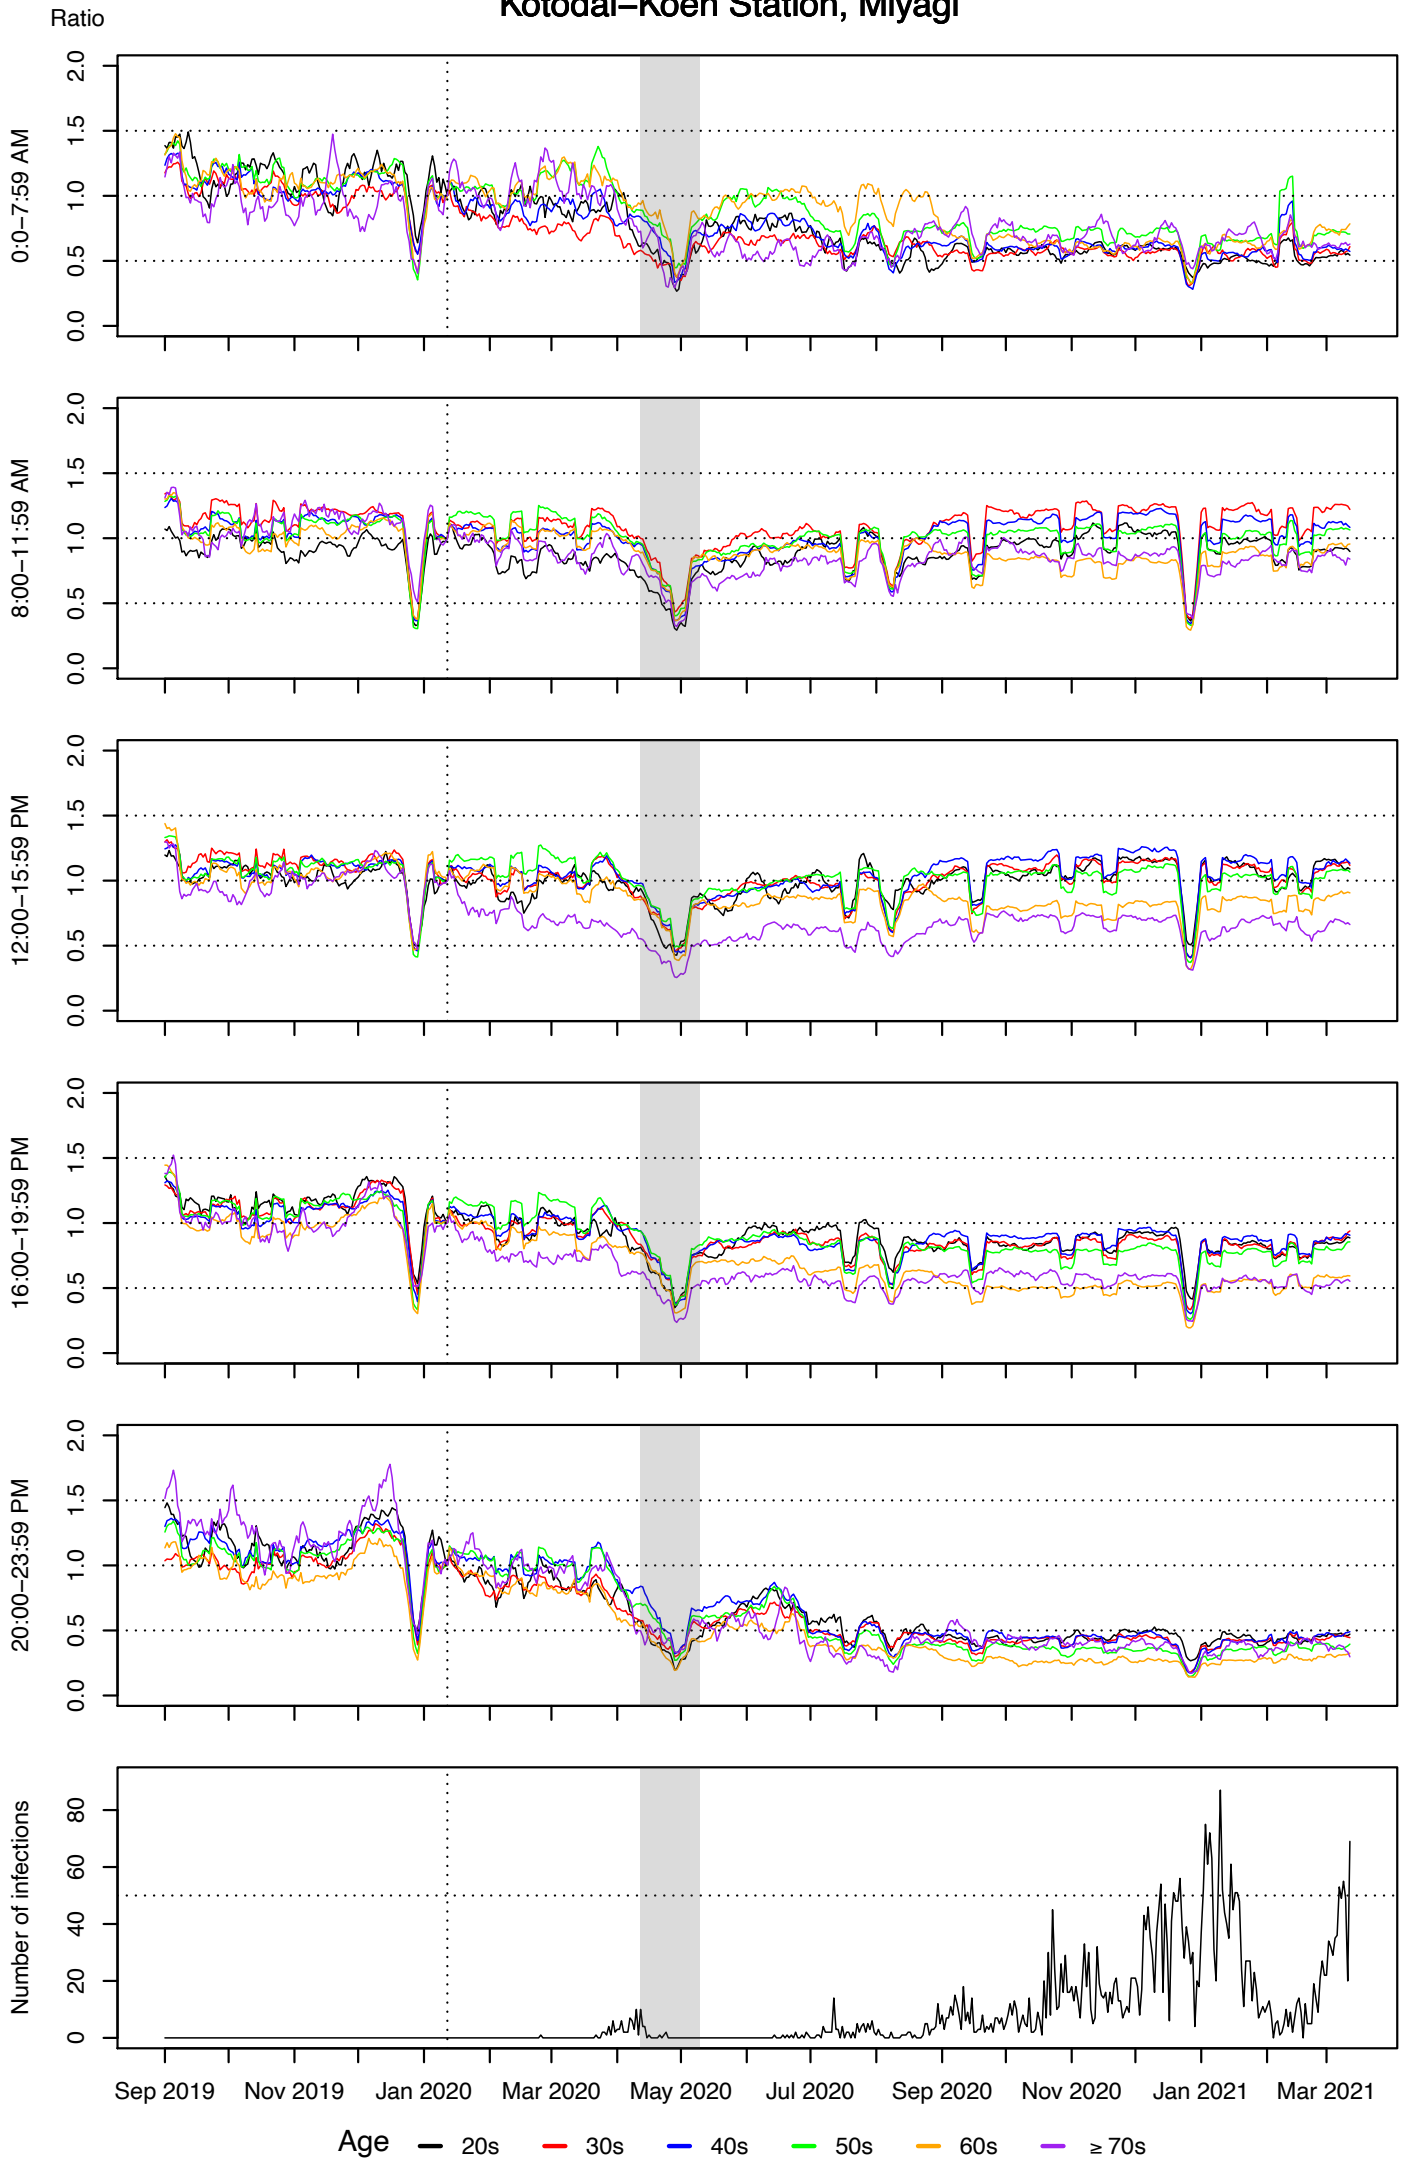

# Kitashinchi Station, Osaka

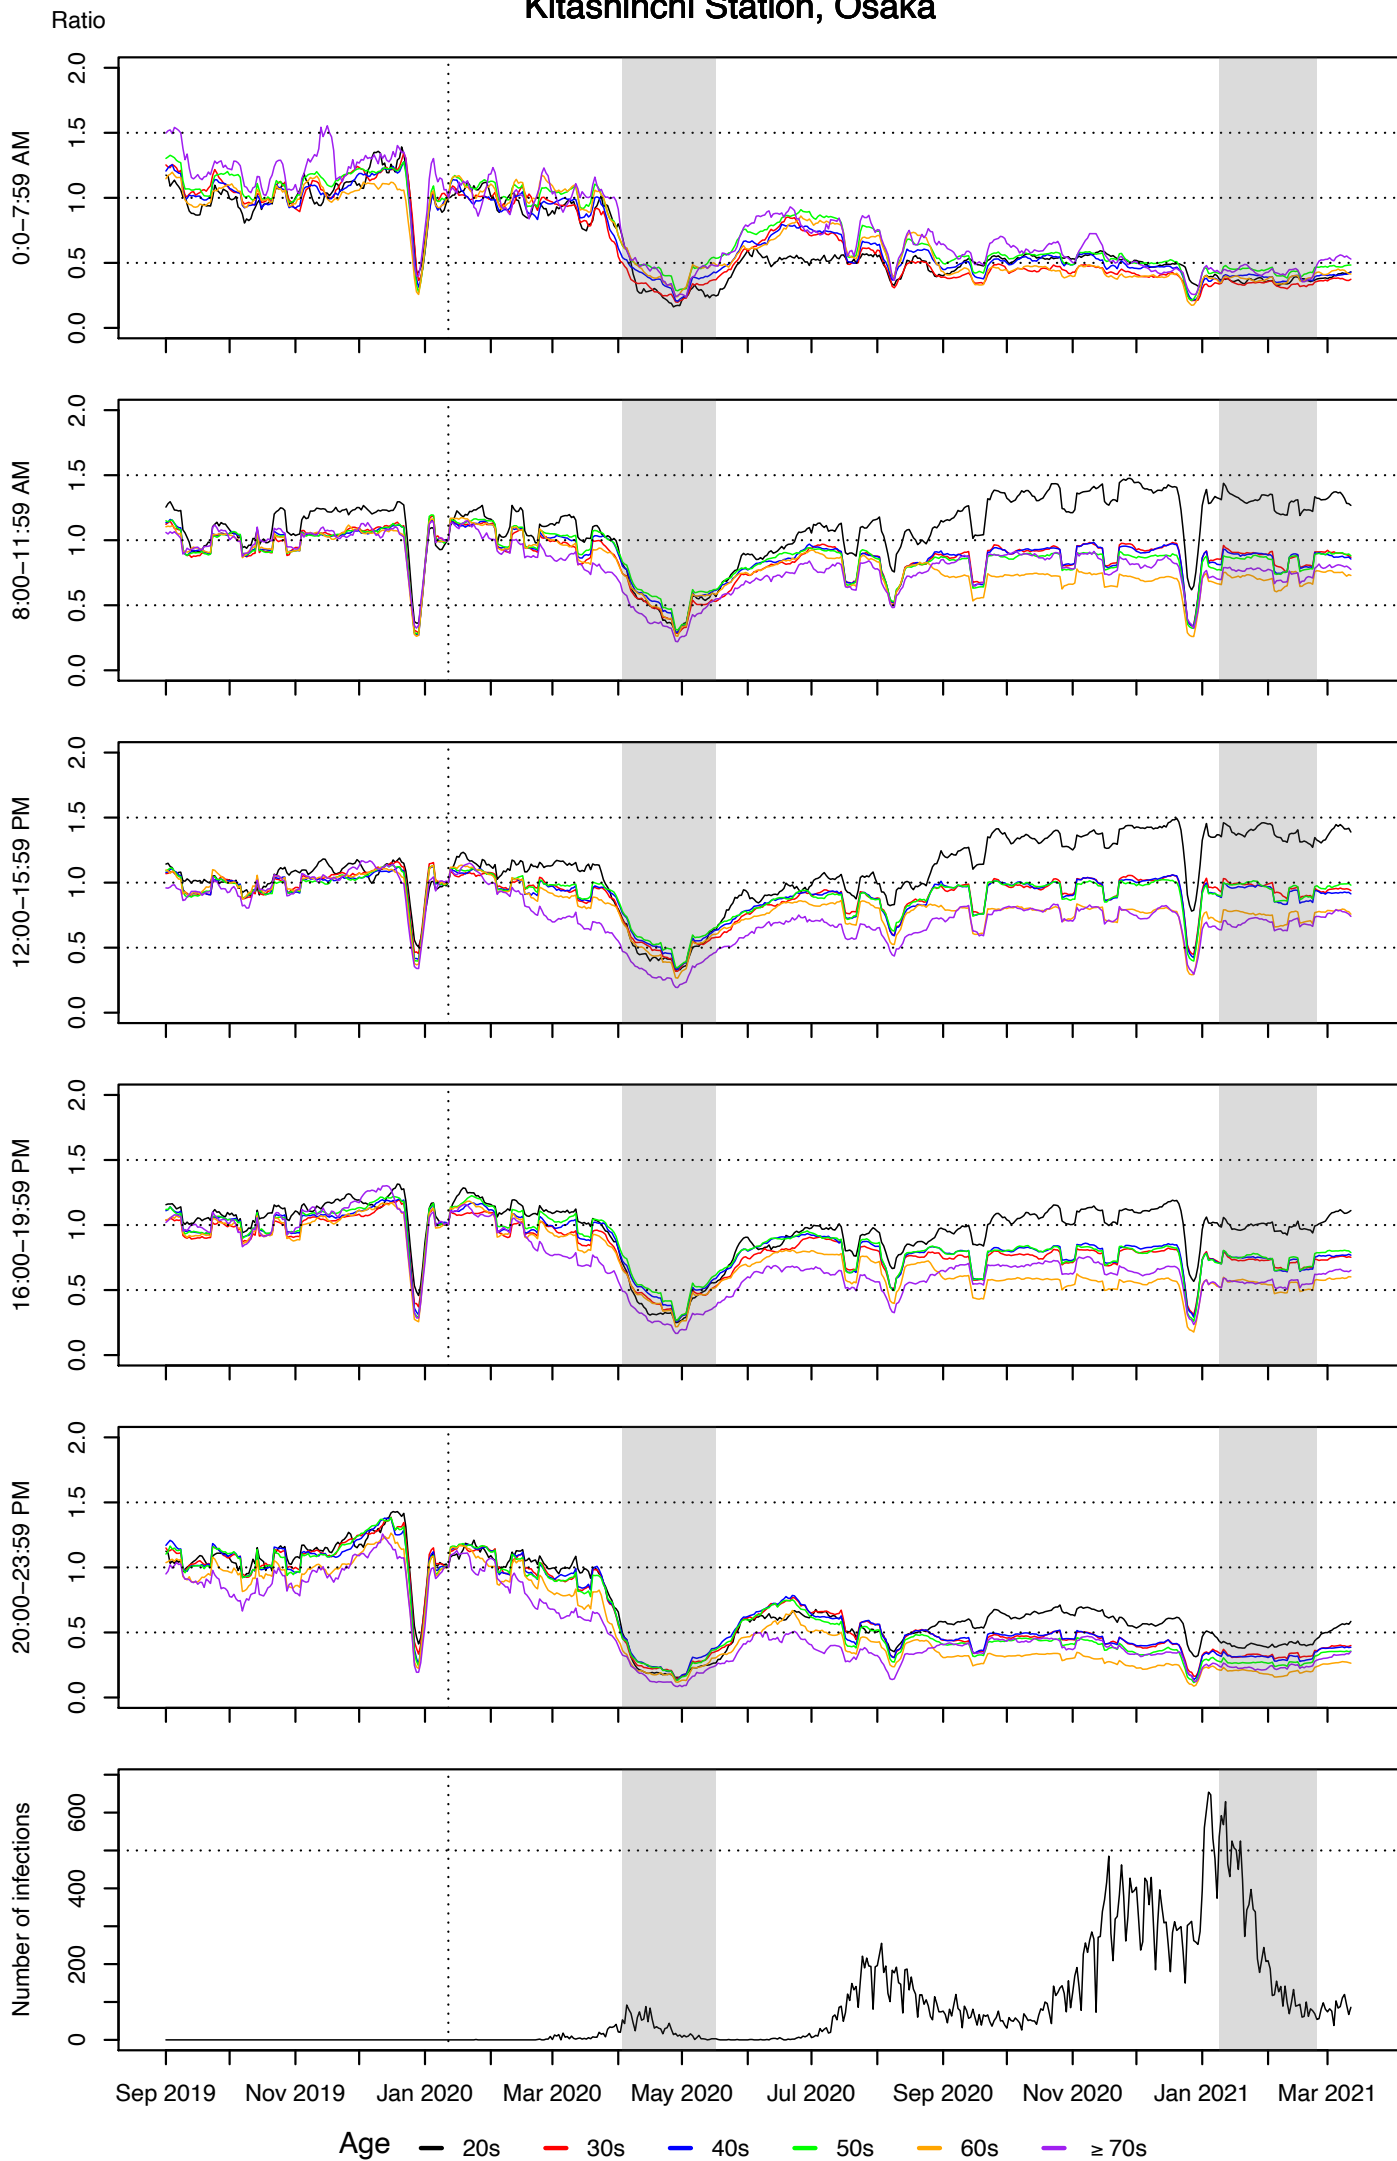

# Hakata Station, Fukuoka

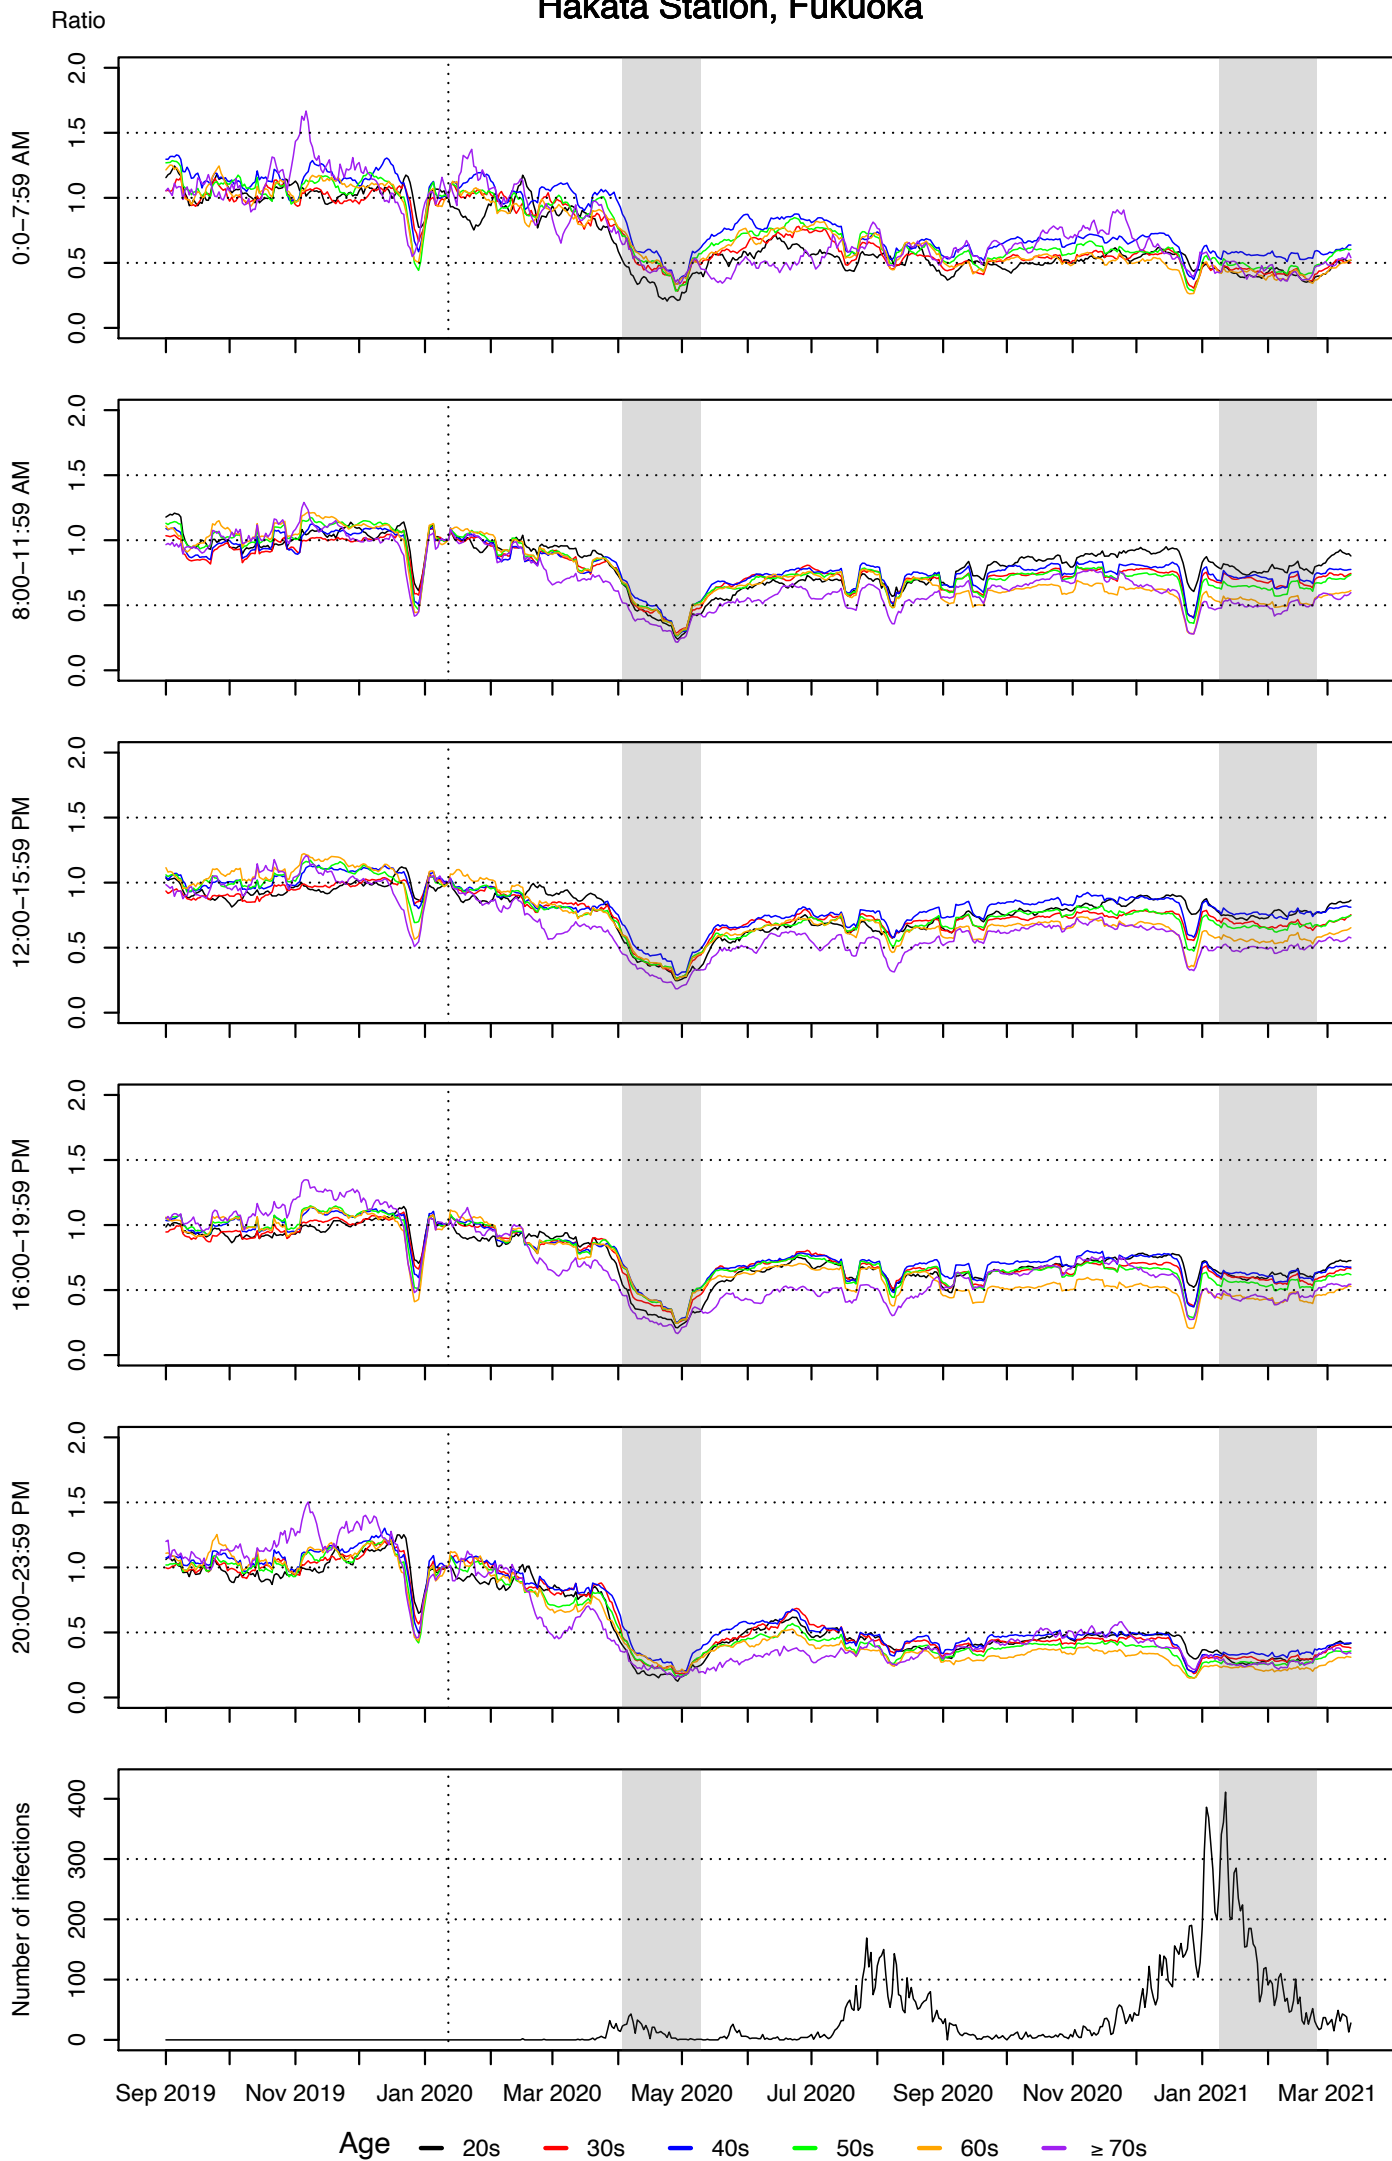

# Harajuku Station, Tokyo

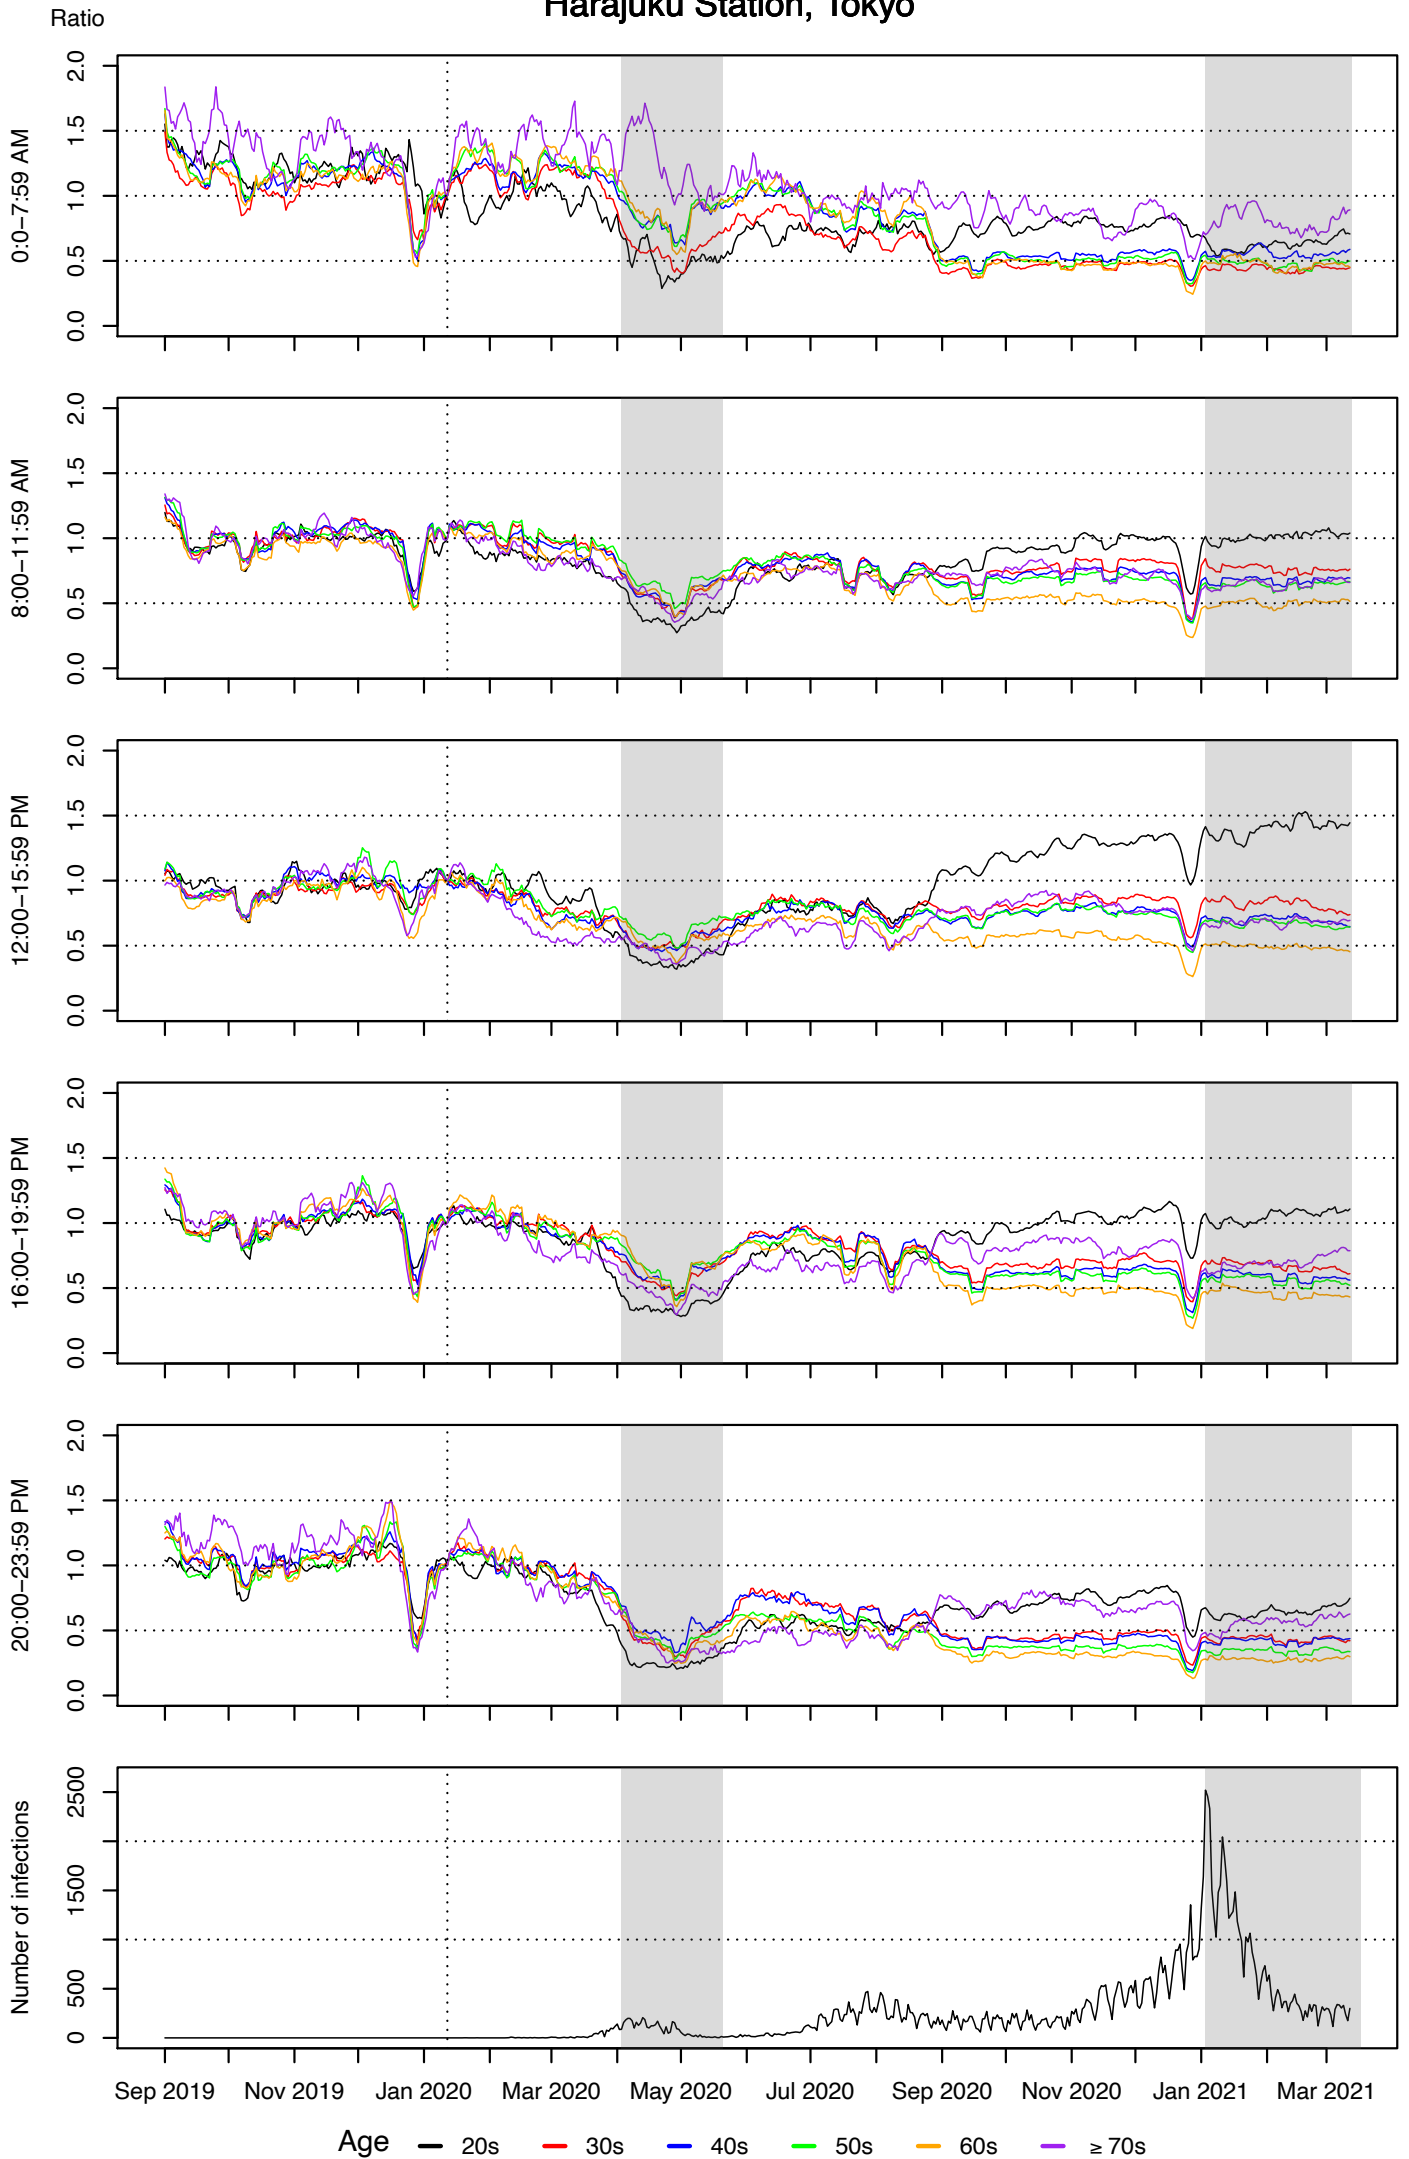



# Kichijoji Station, Tokyo

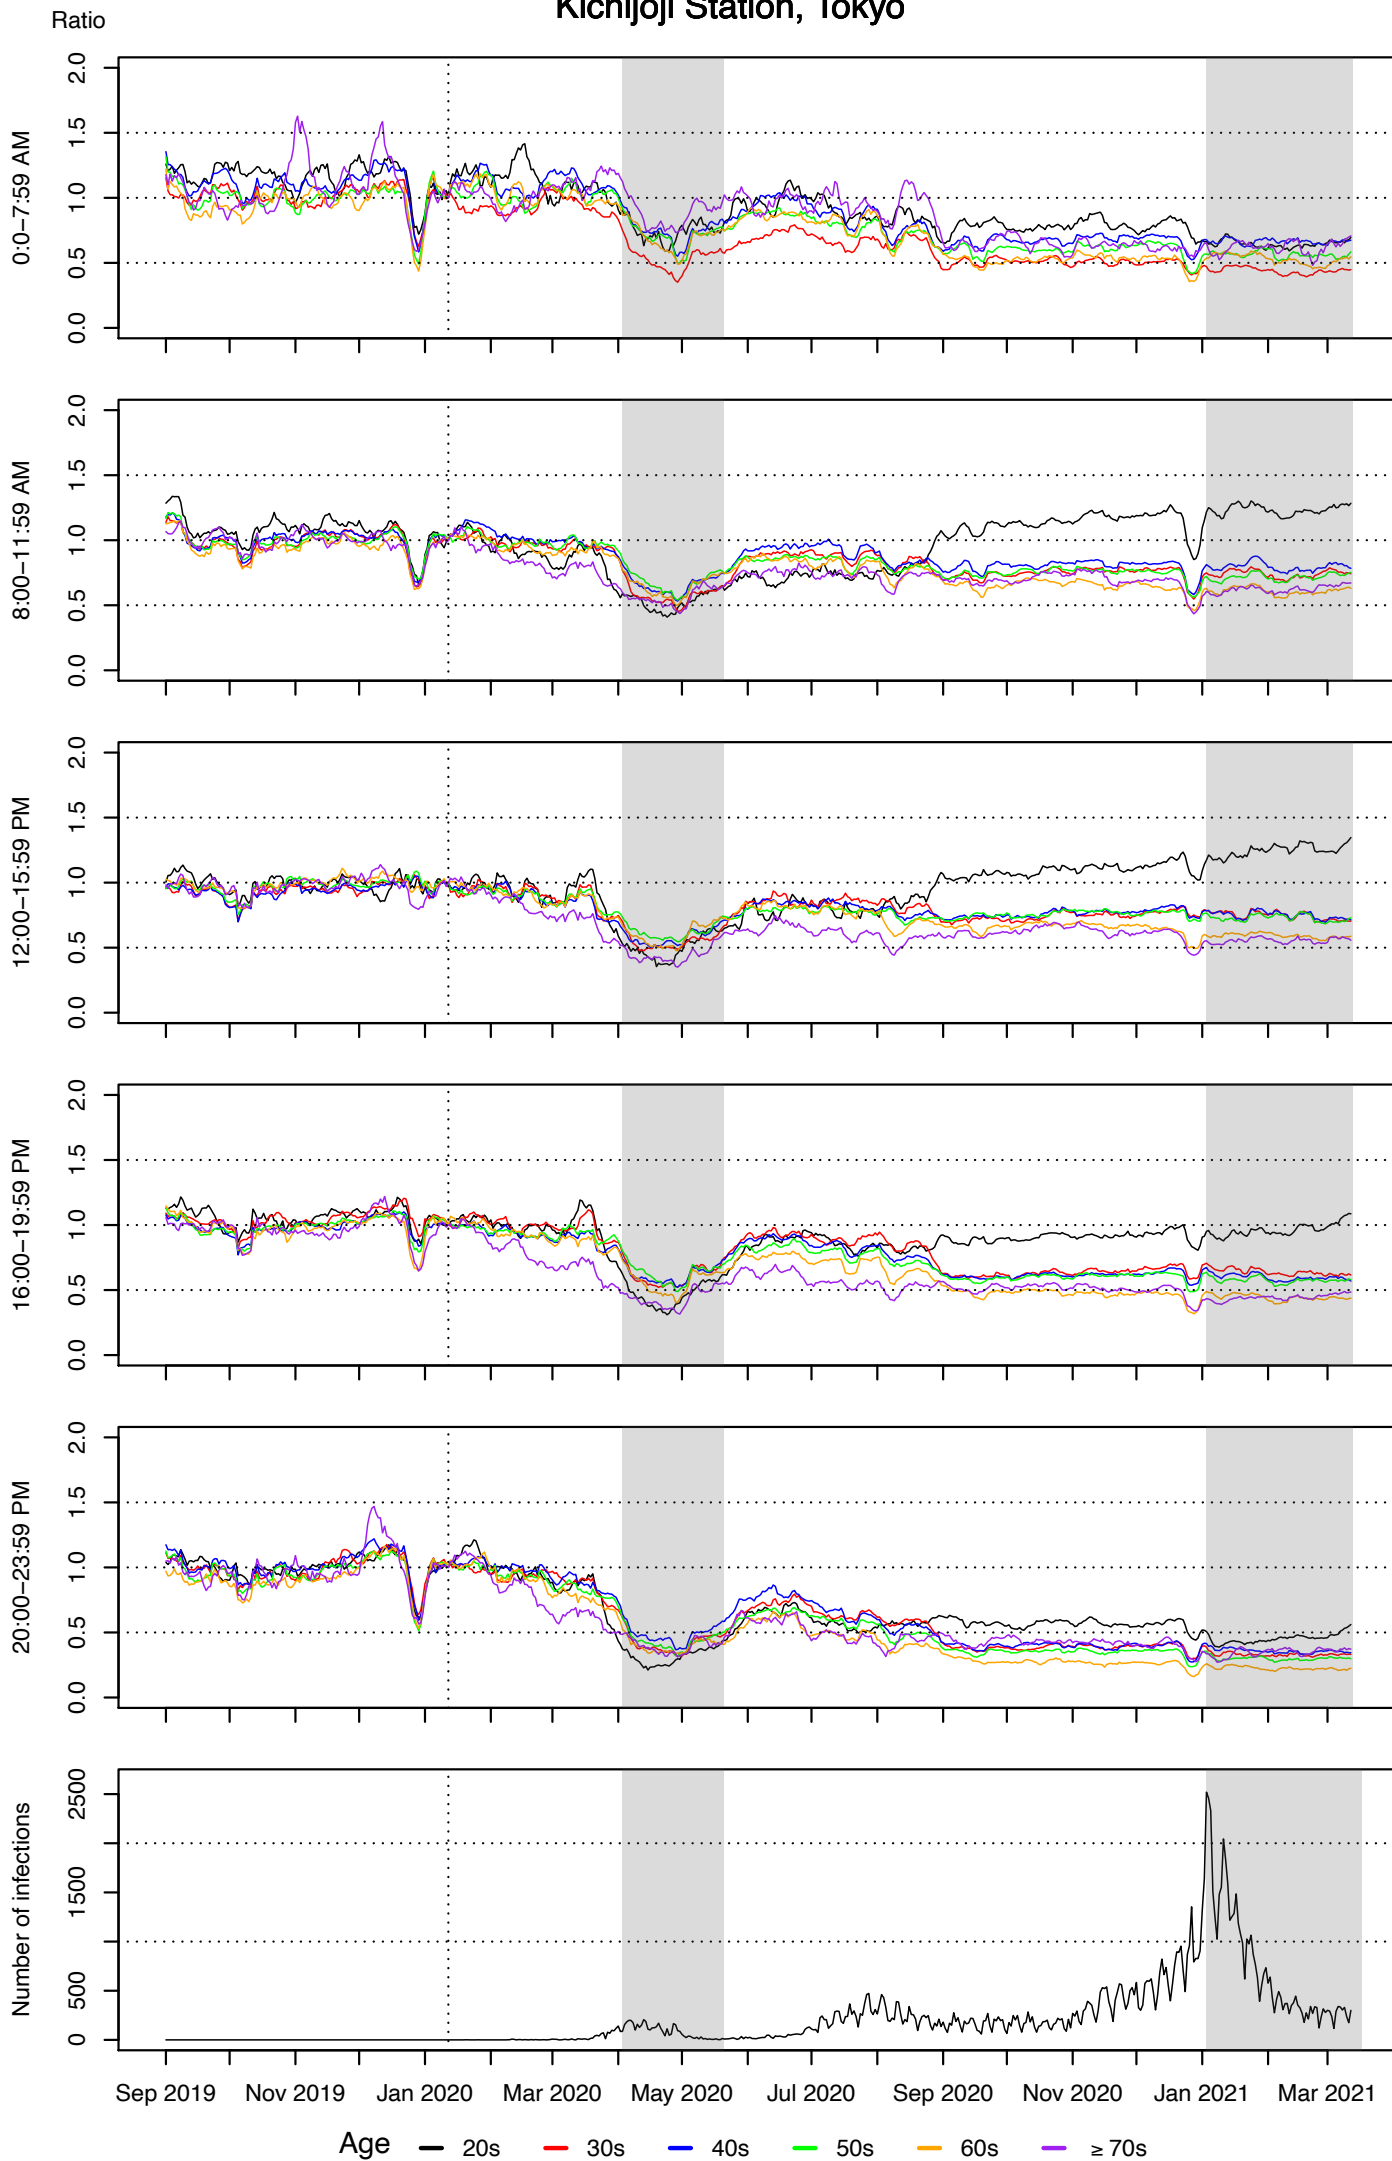

# Shinagawa Station, Tokyo

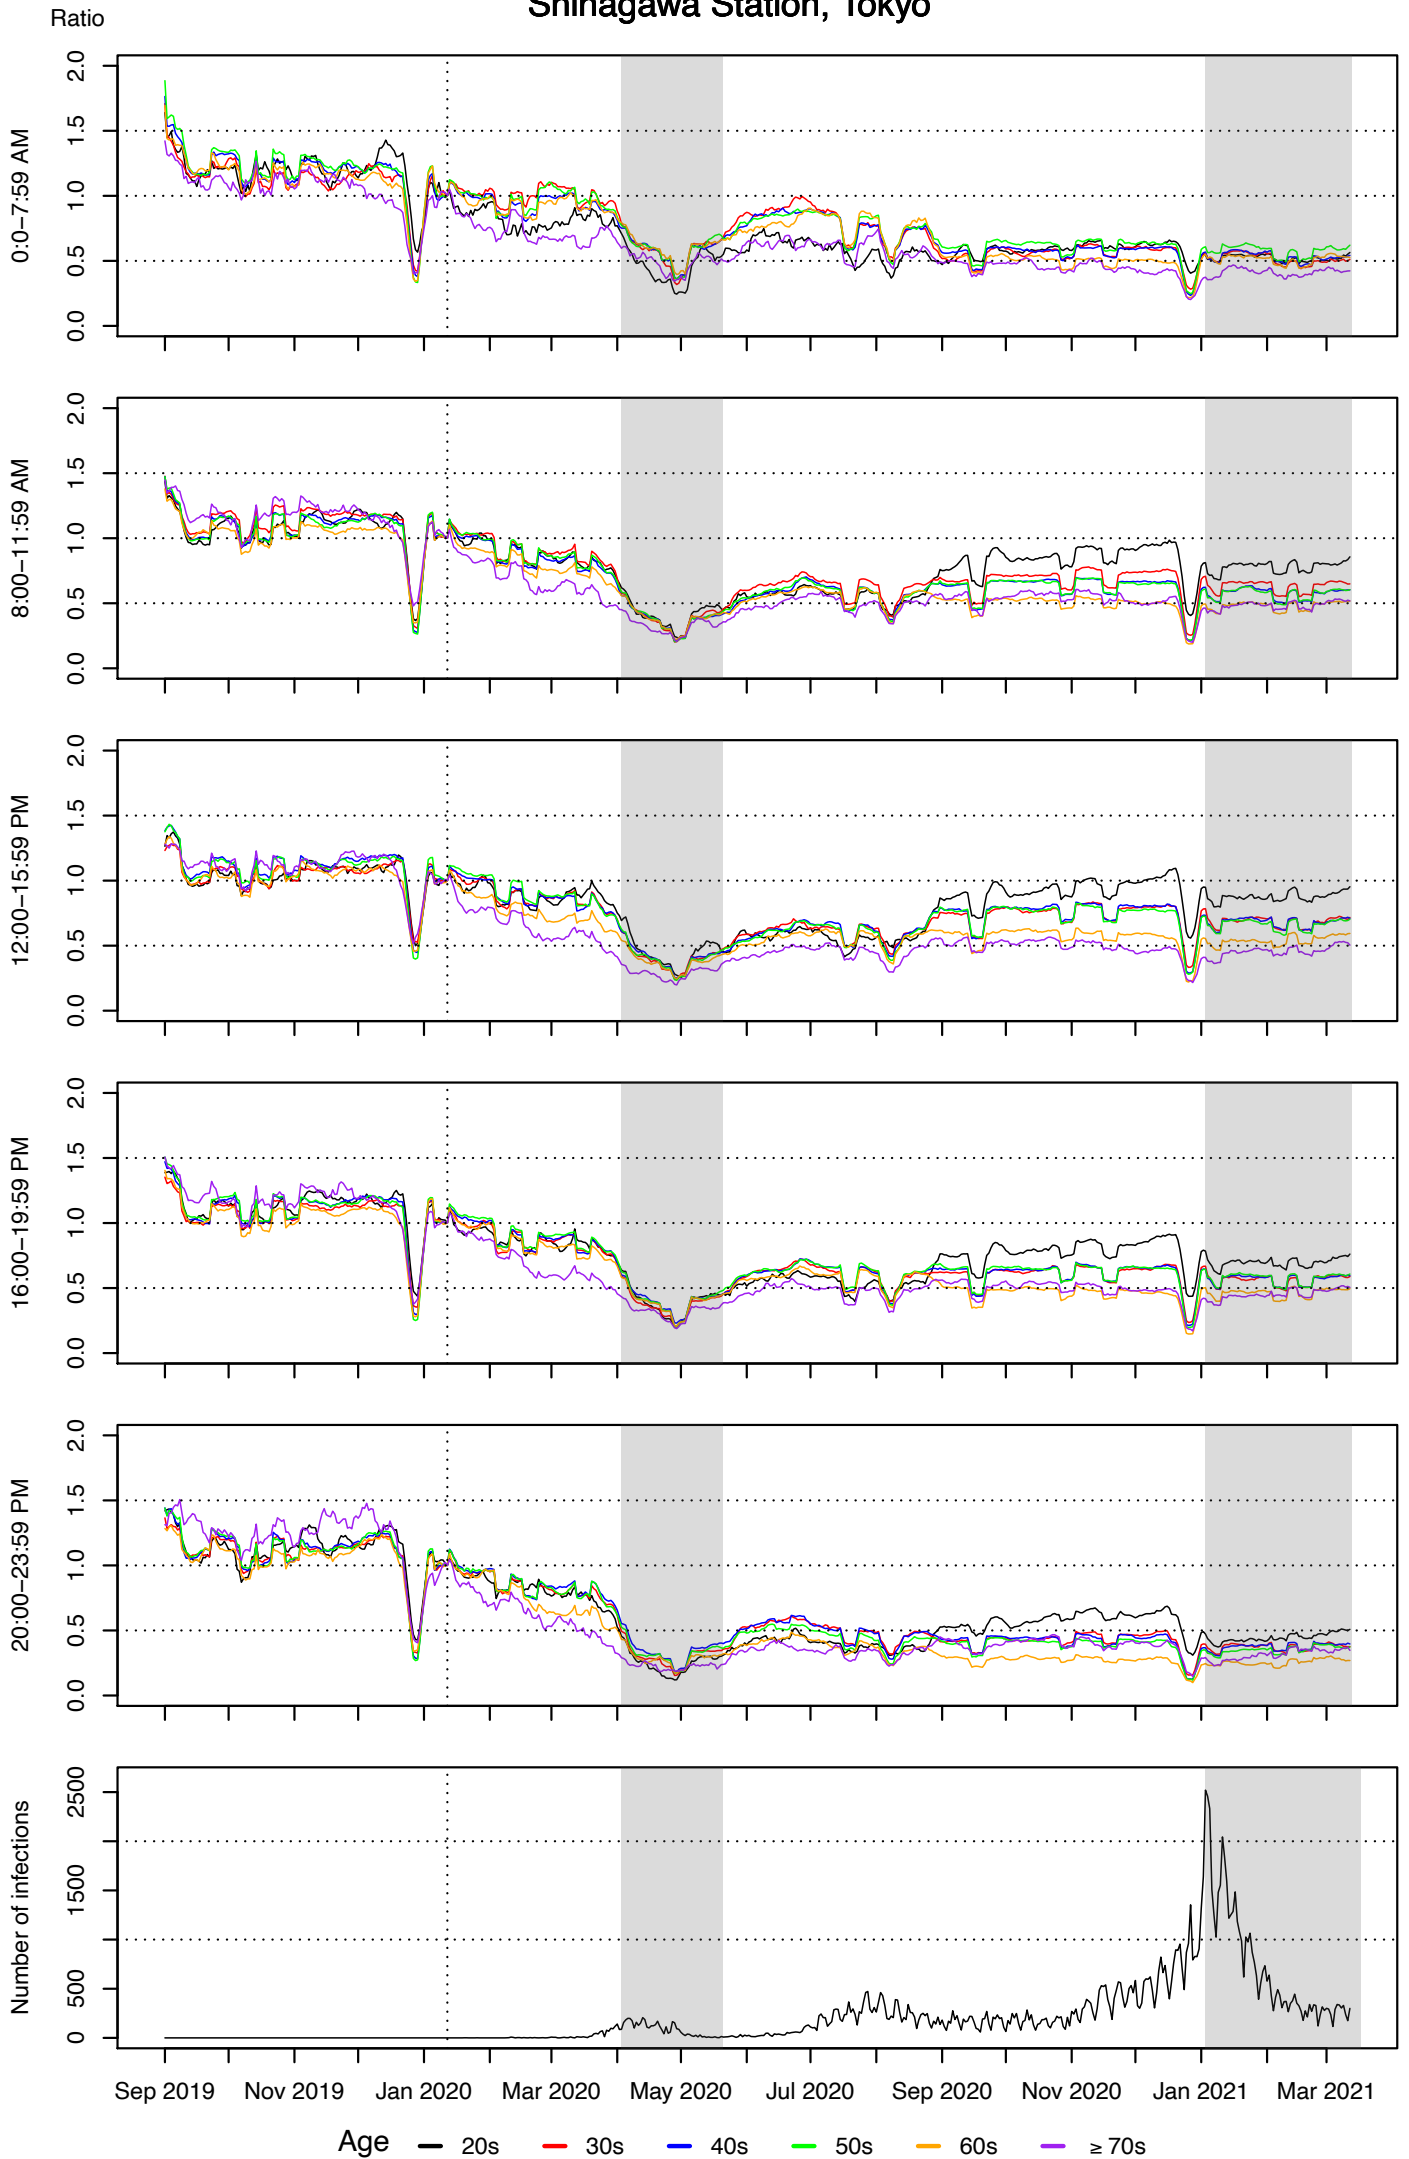





# Shinsaibashi Station, Osaka

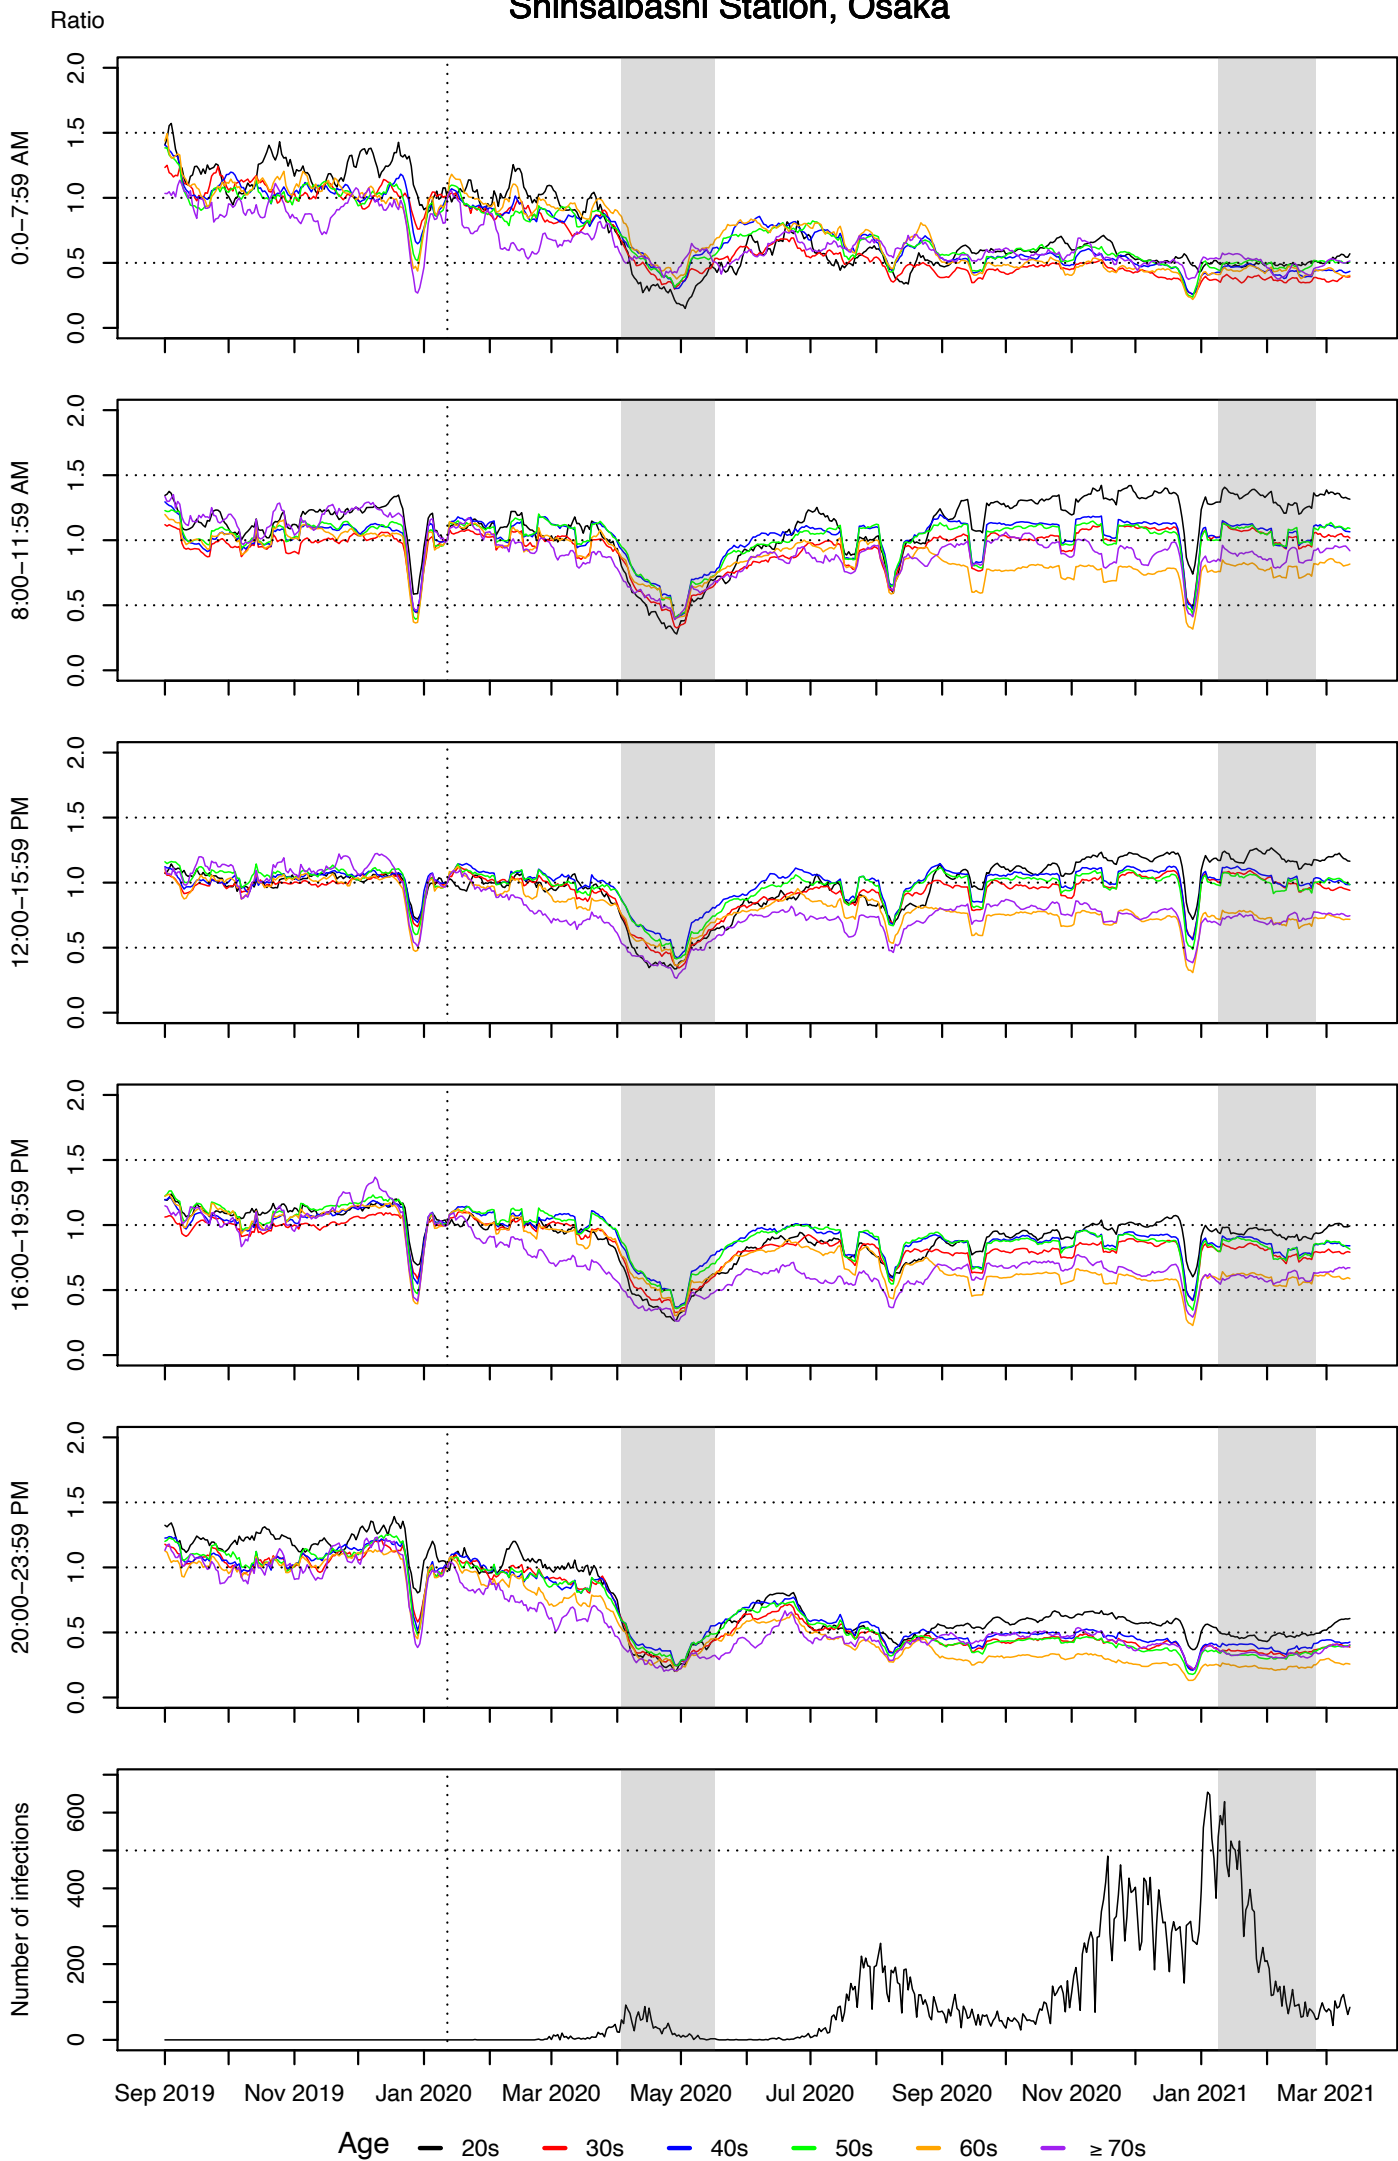

# Shinjuku Kabukicho, Tokyo

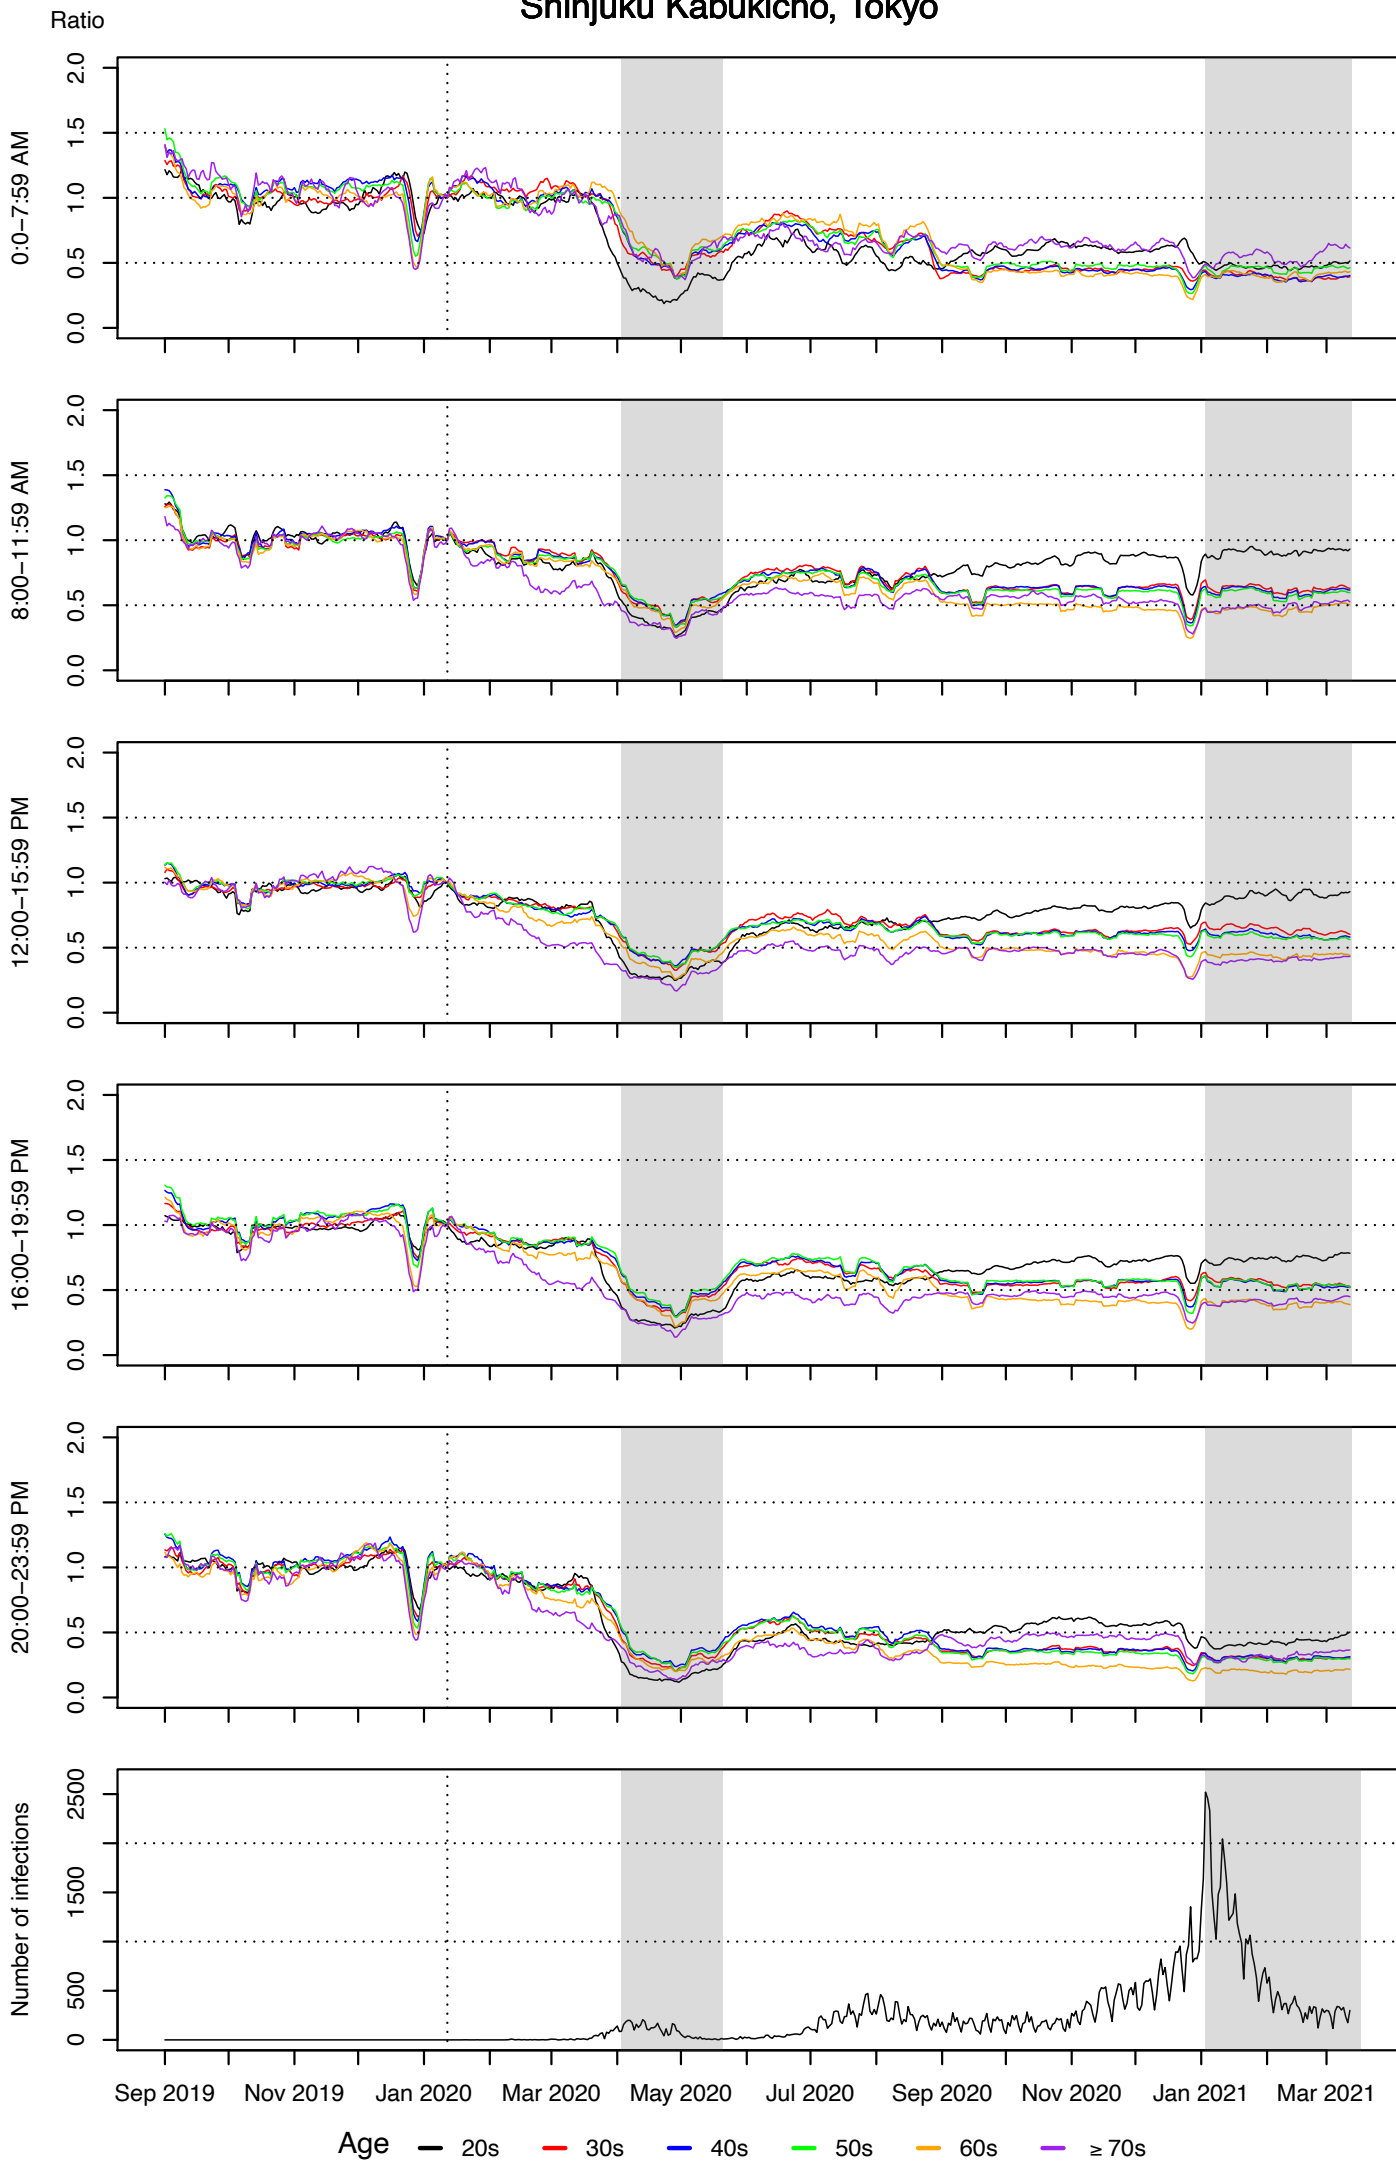

# Shinbashi Station, Tokyo

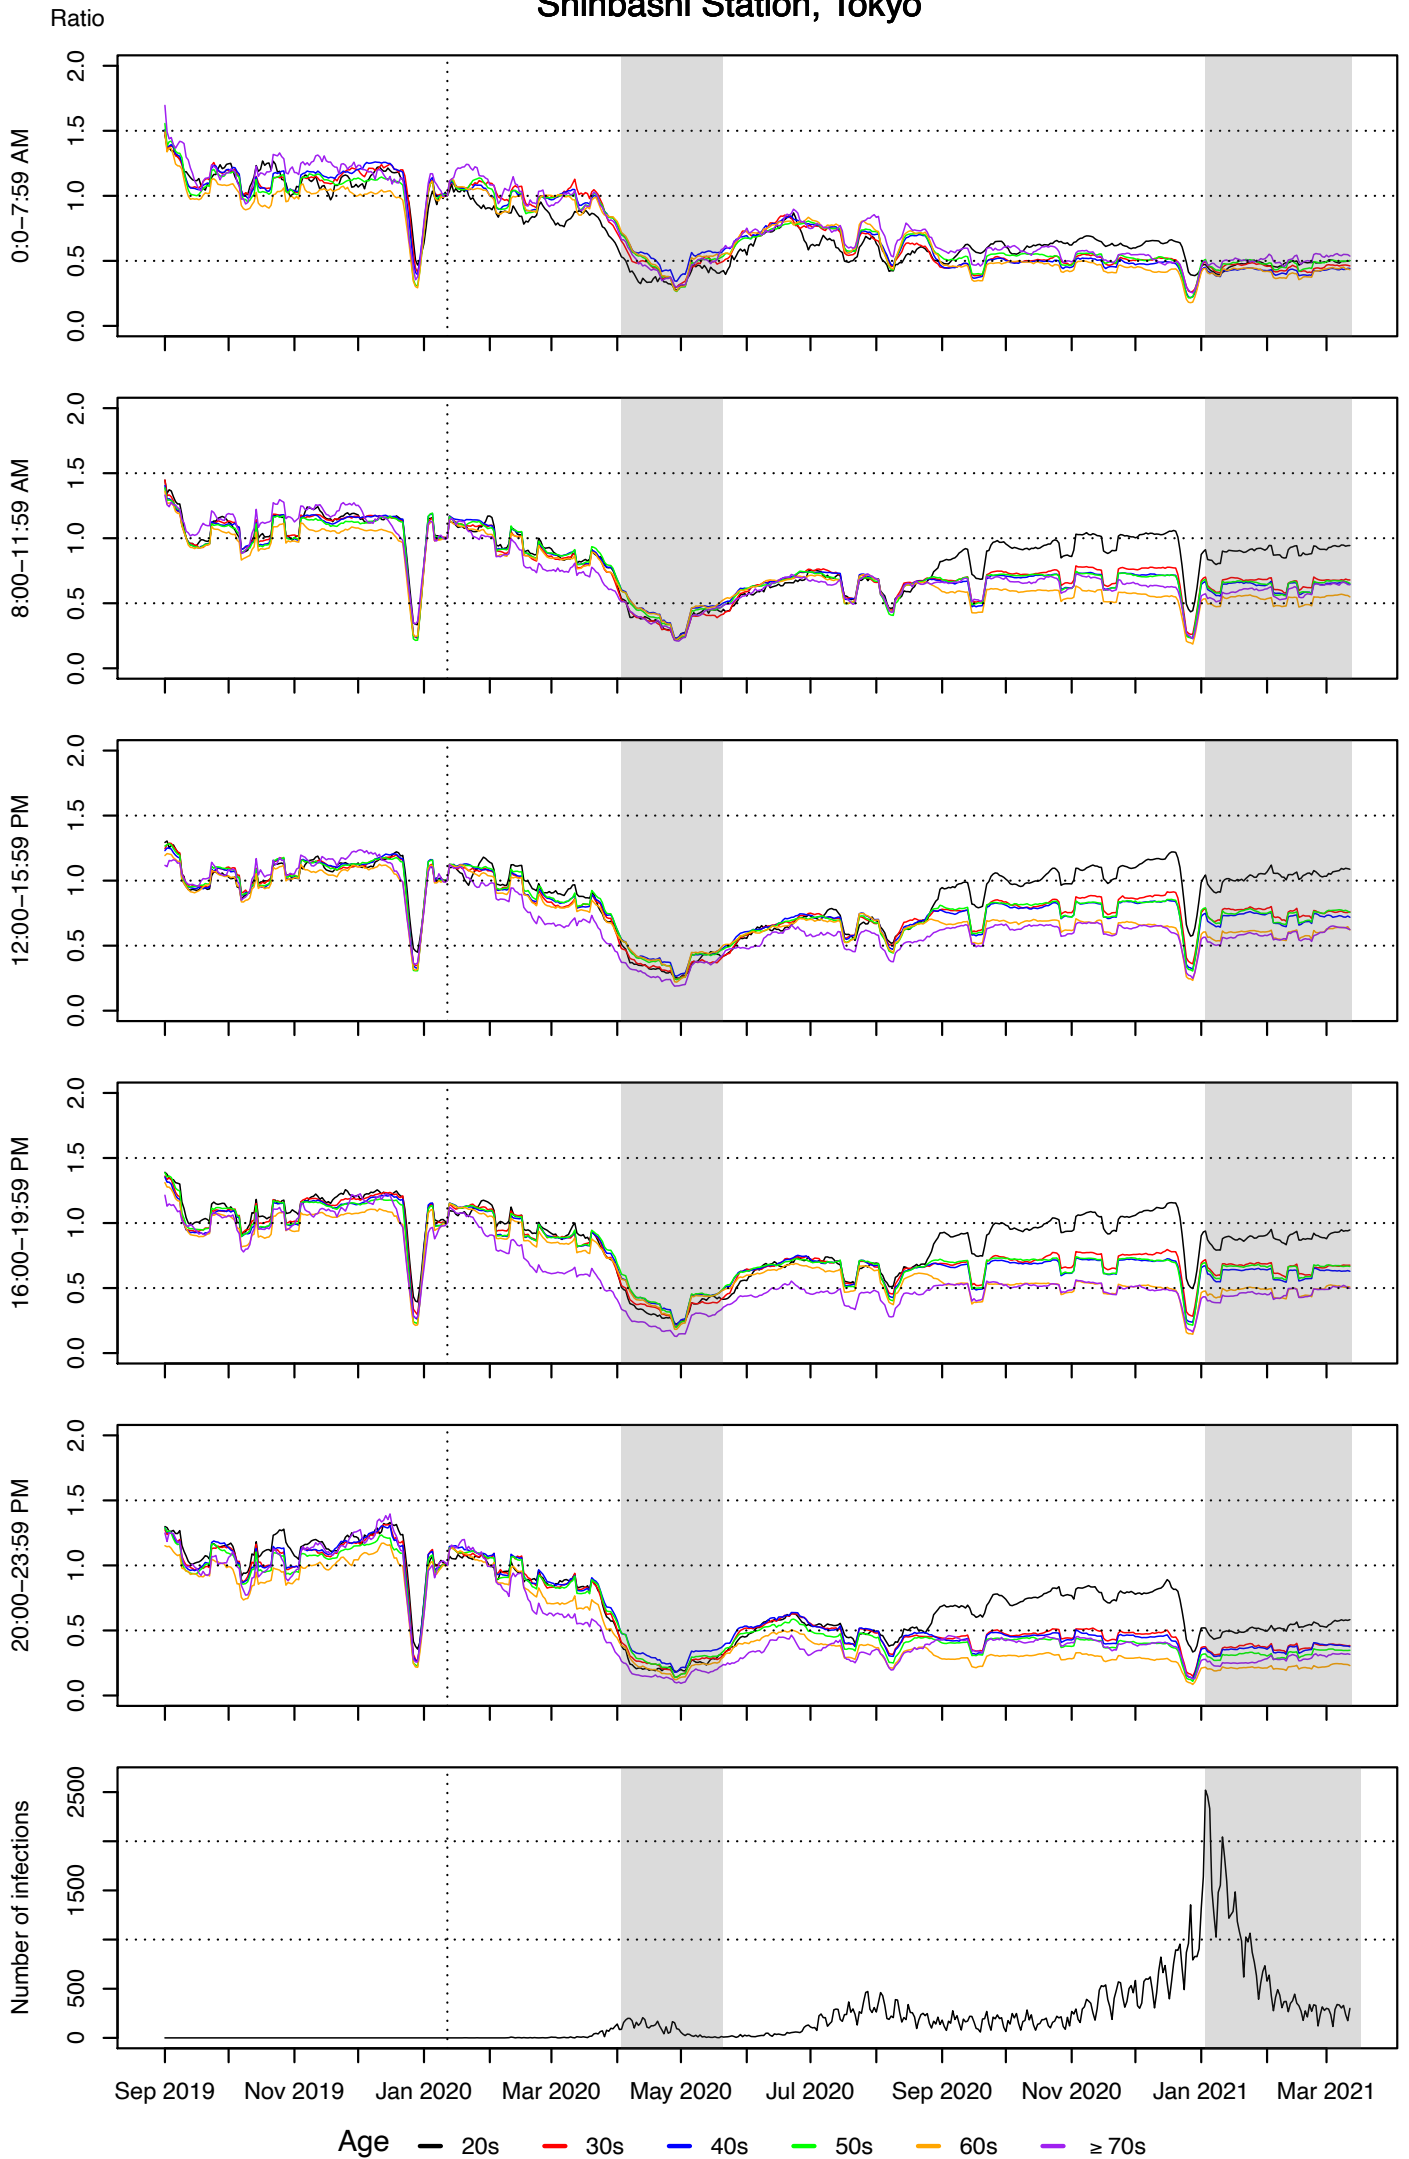

# Tobu-Utsunomiya Station, Tochigi

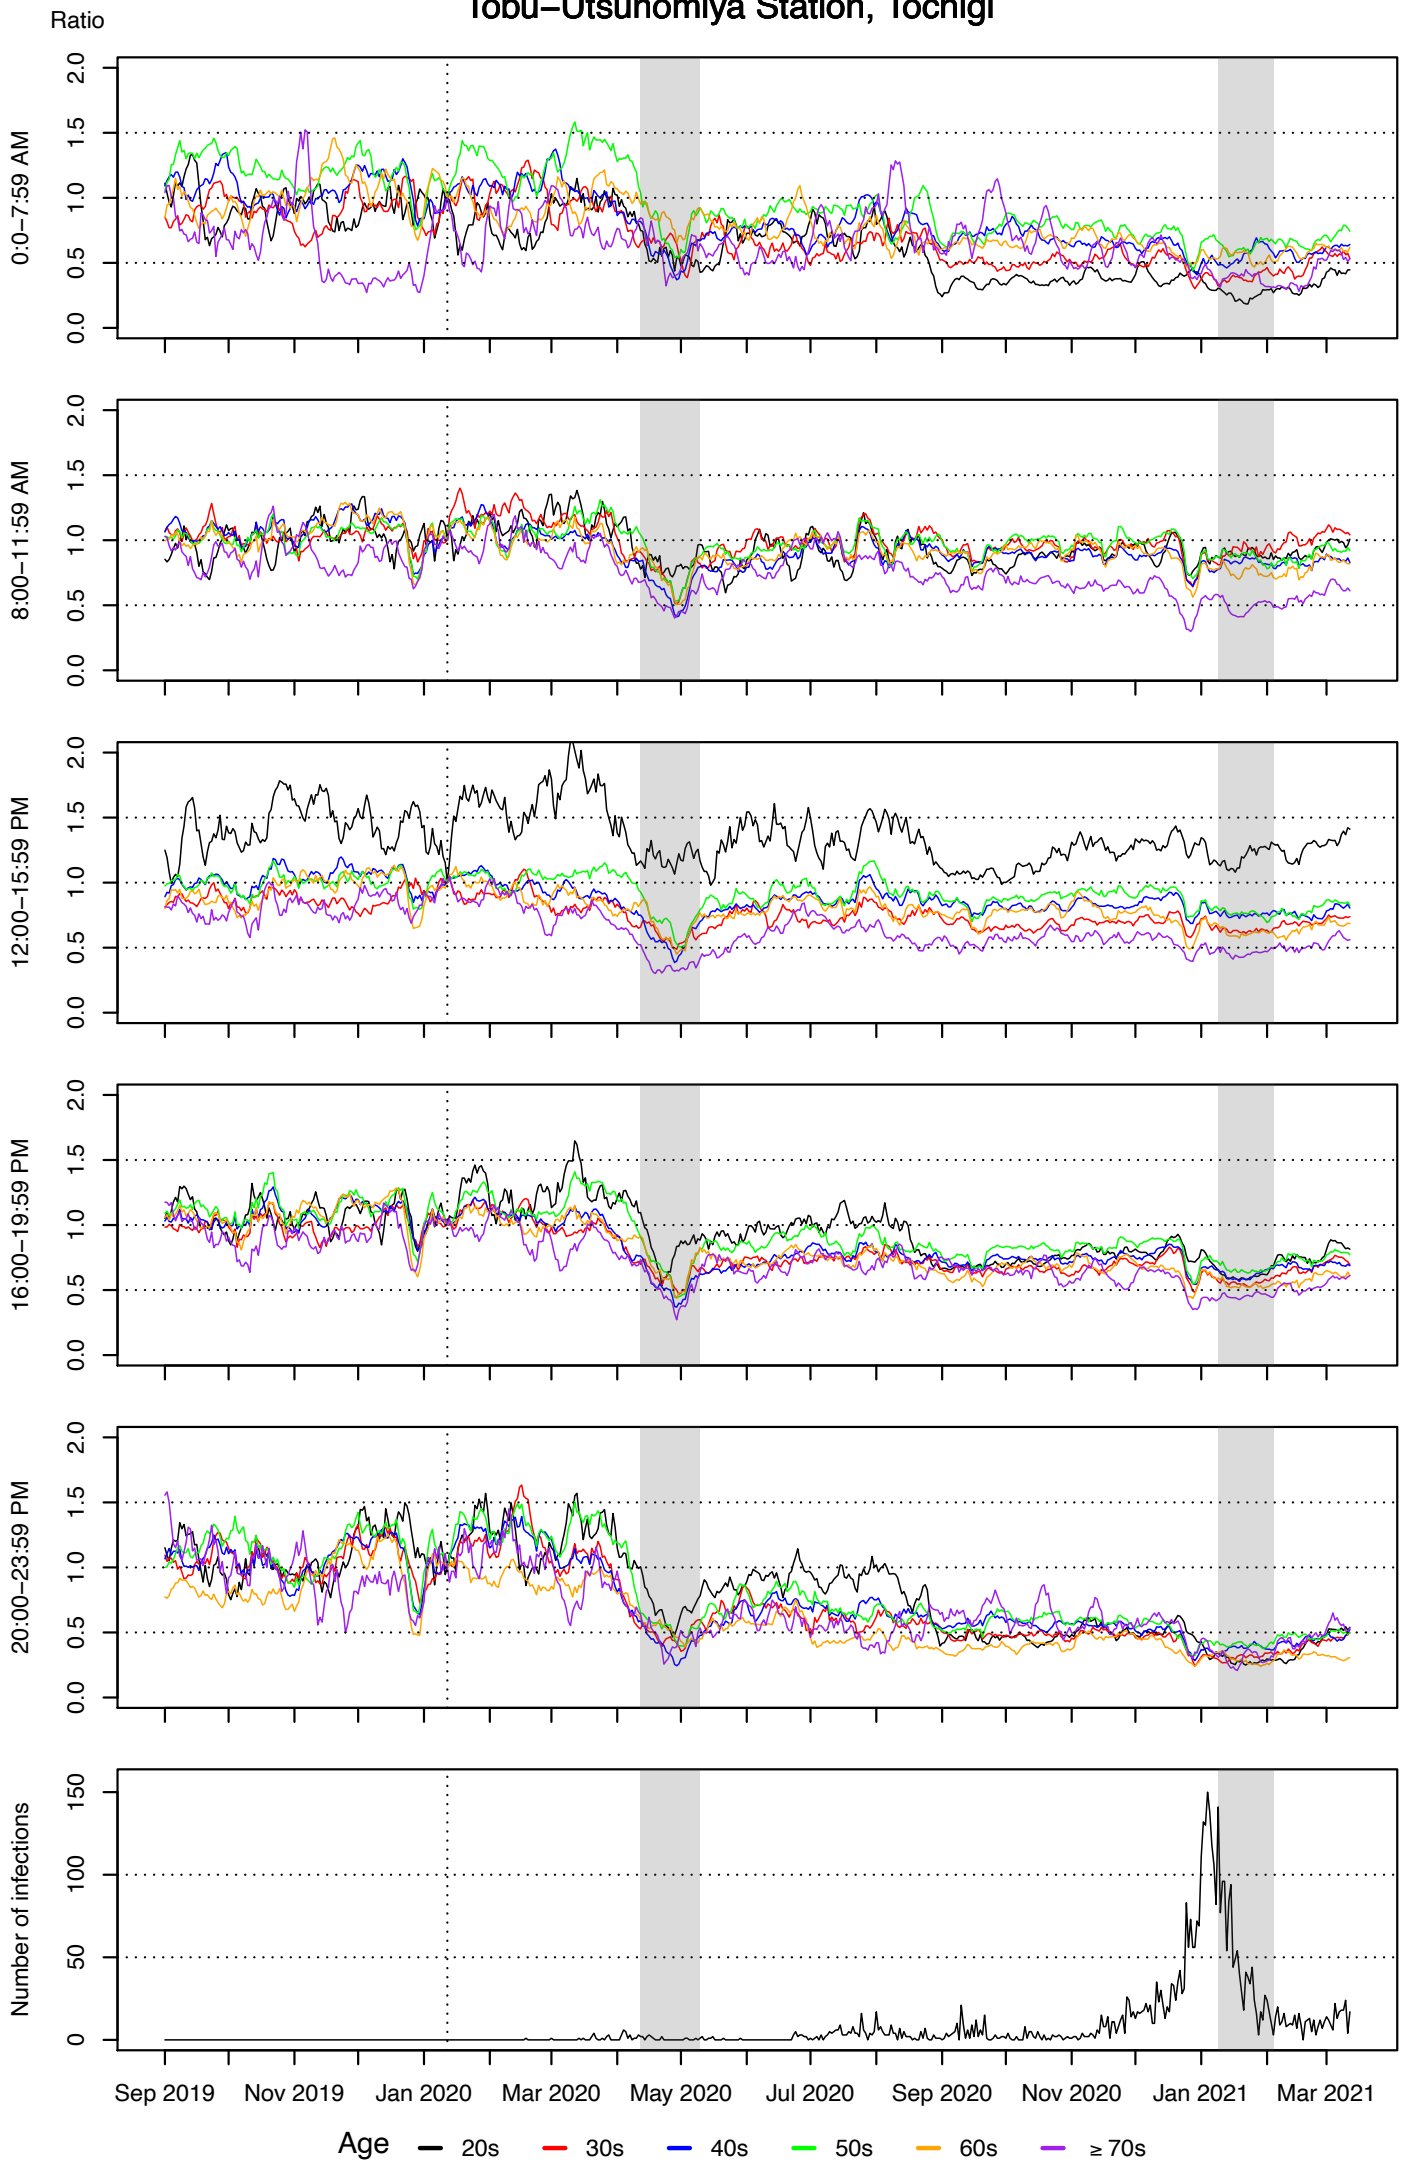

# Sakae Station, Aichi

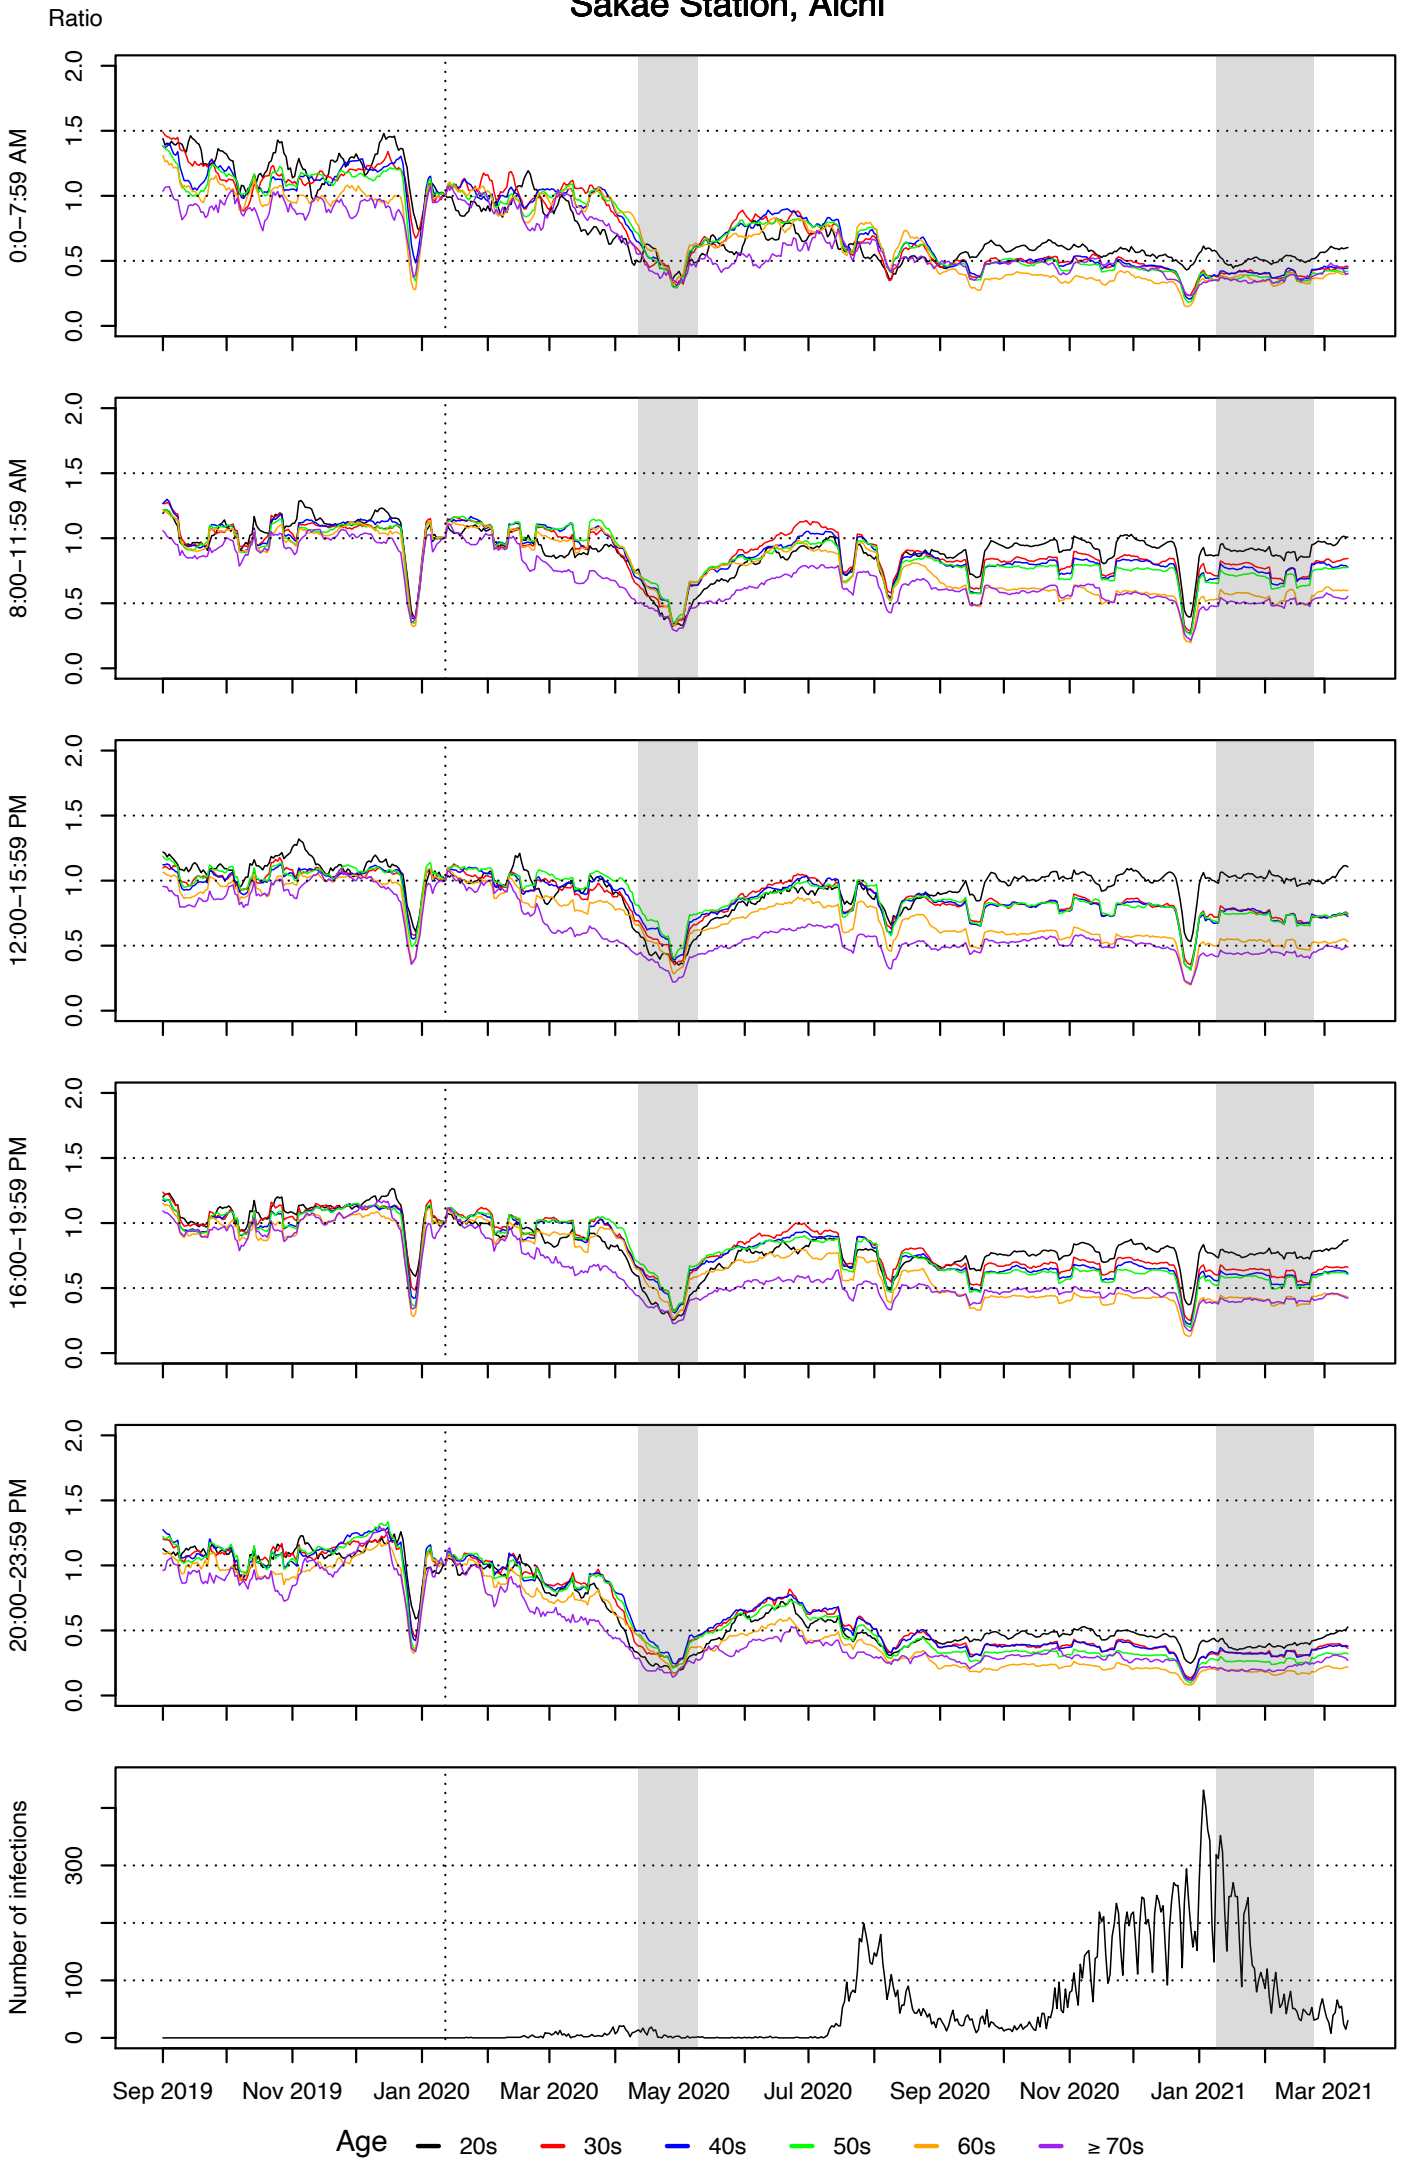



# Sakuragicho Station, Kanagawa

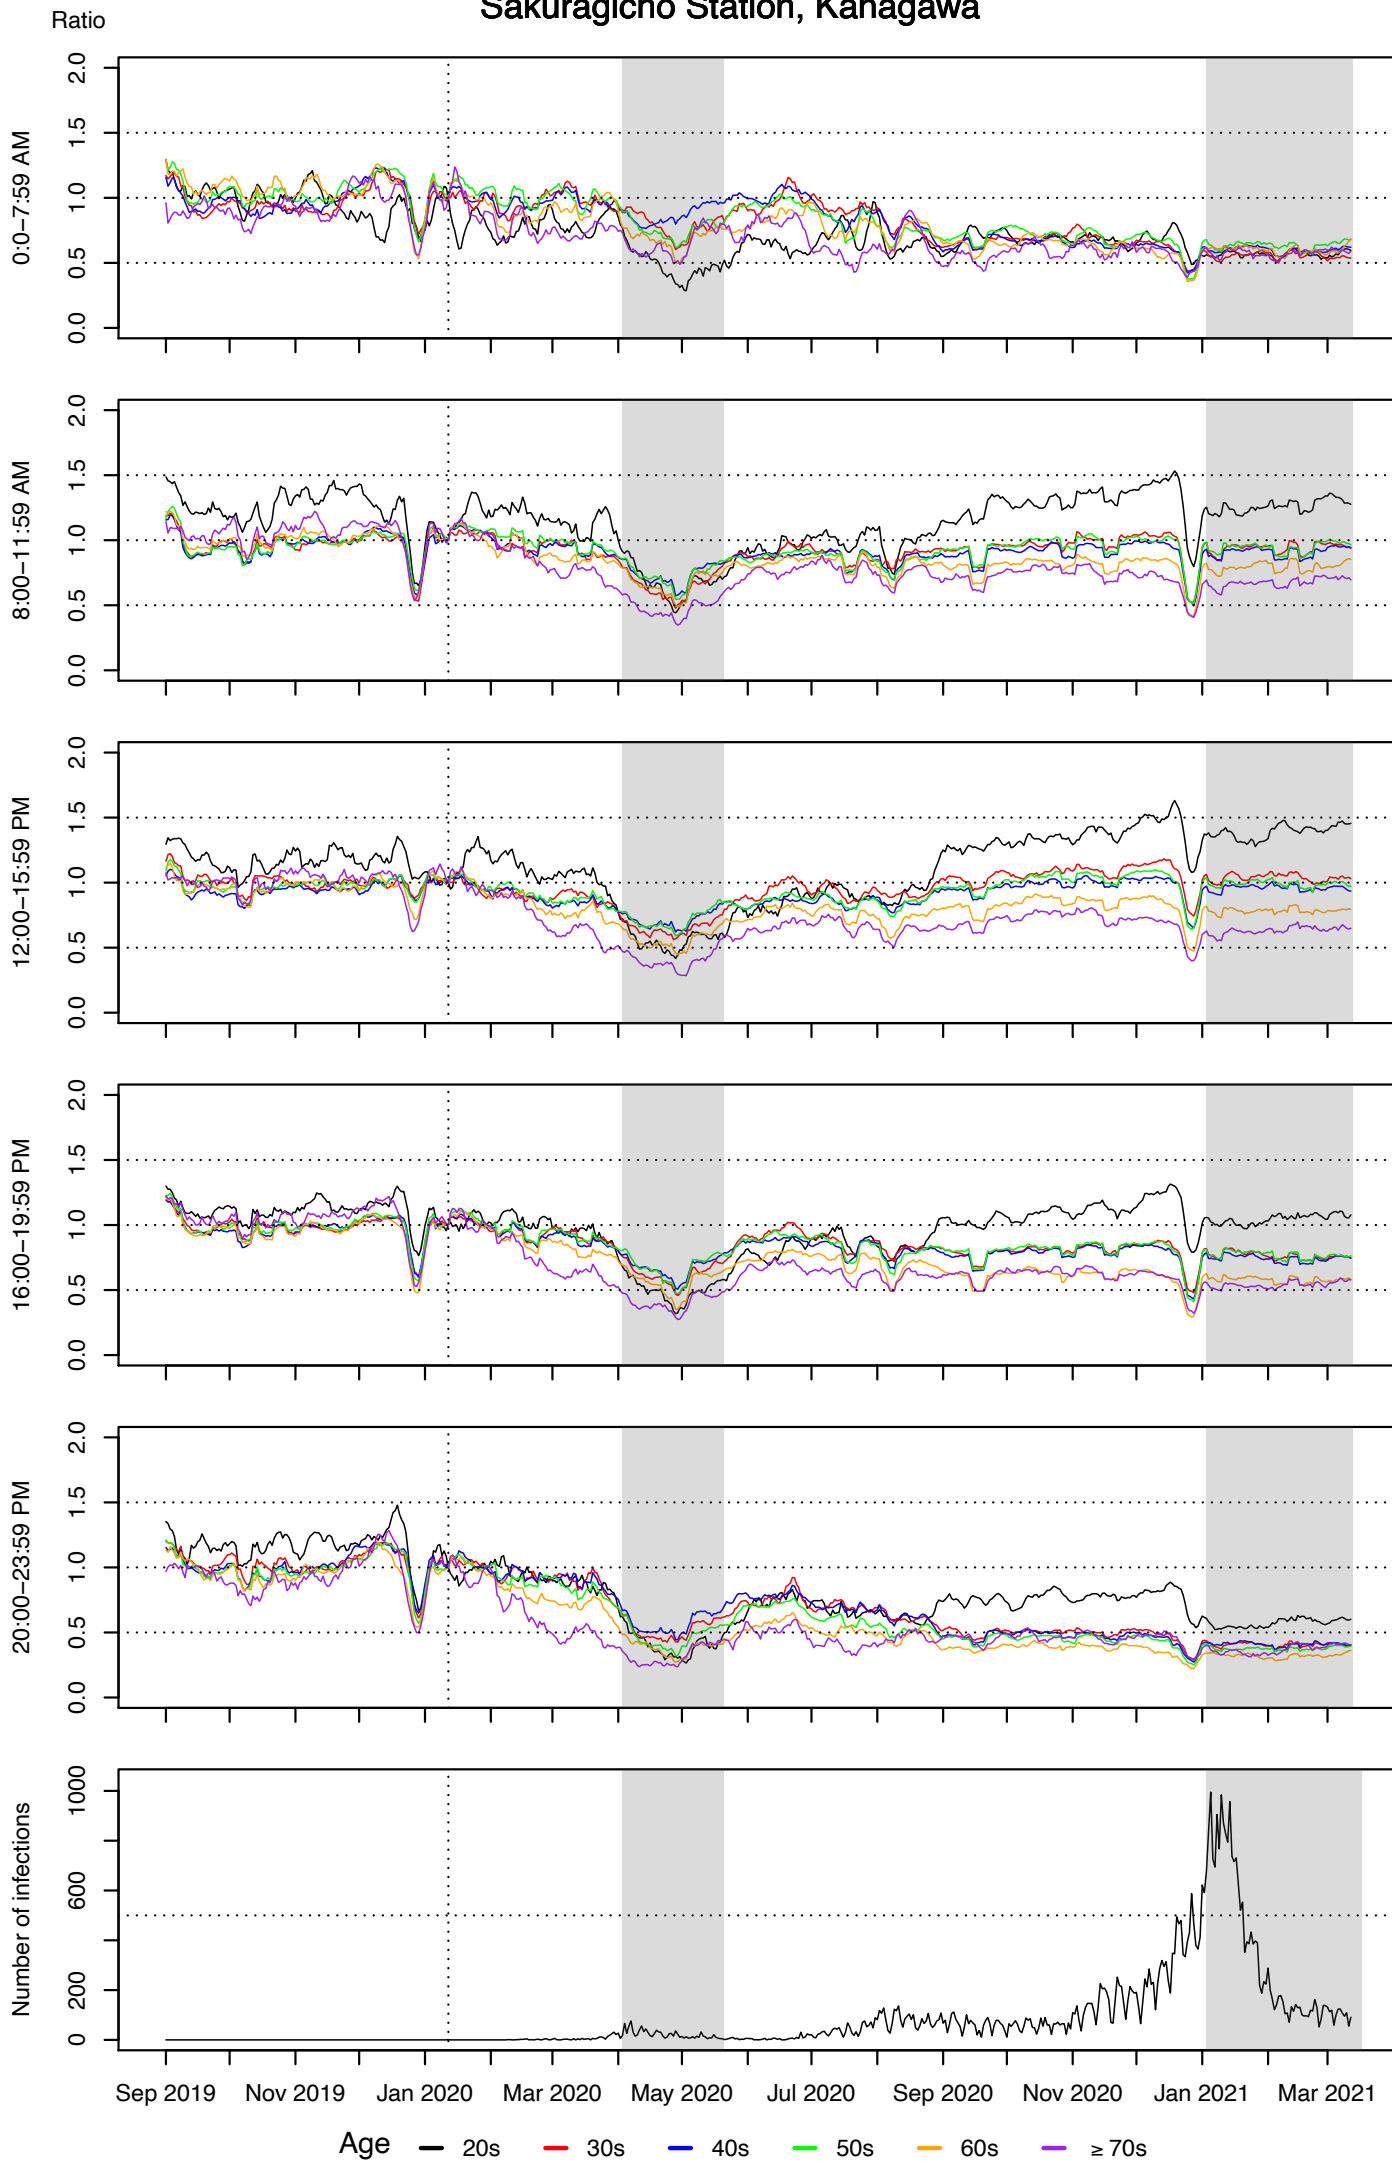

# Ikebukuro Station, Tokyo

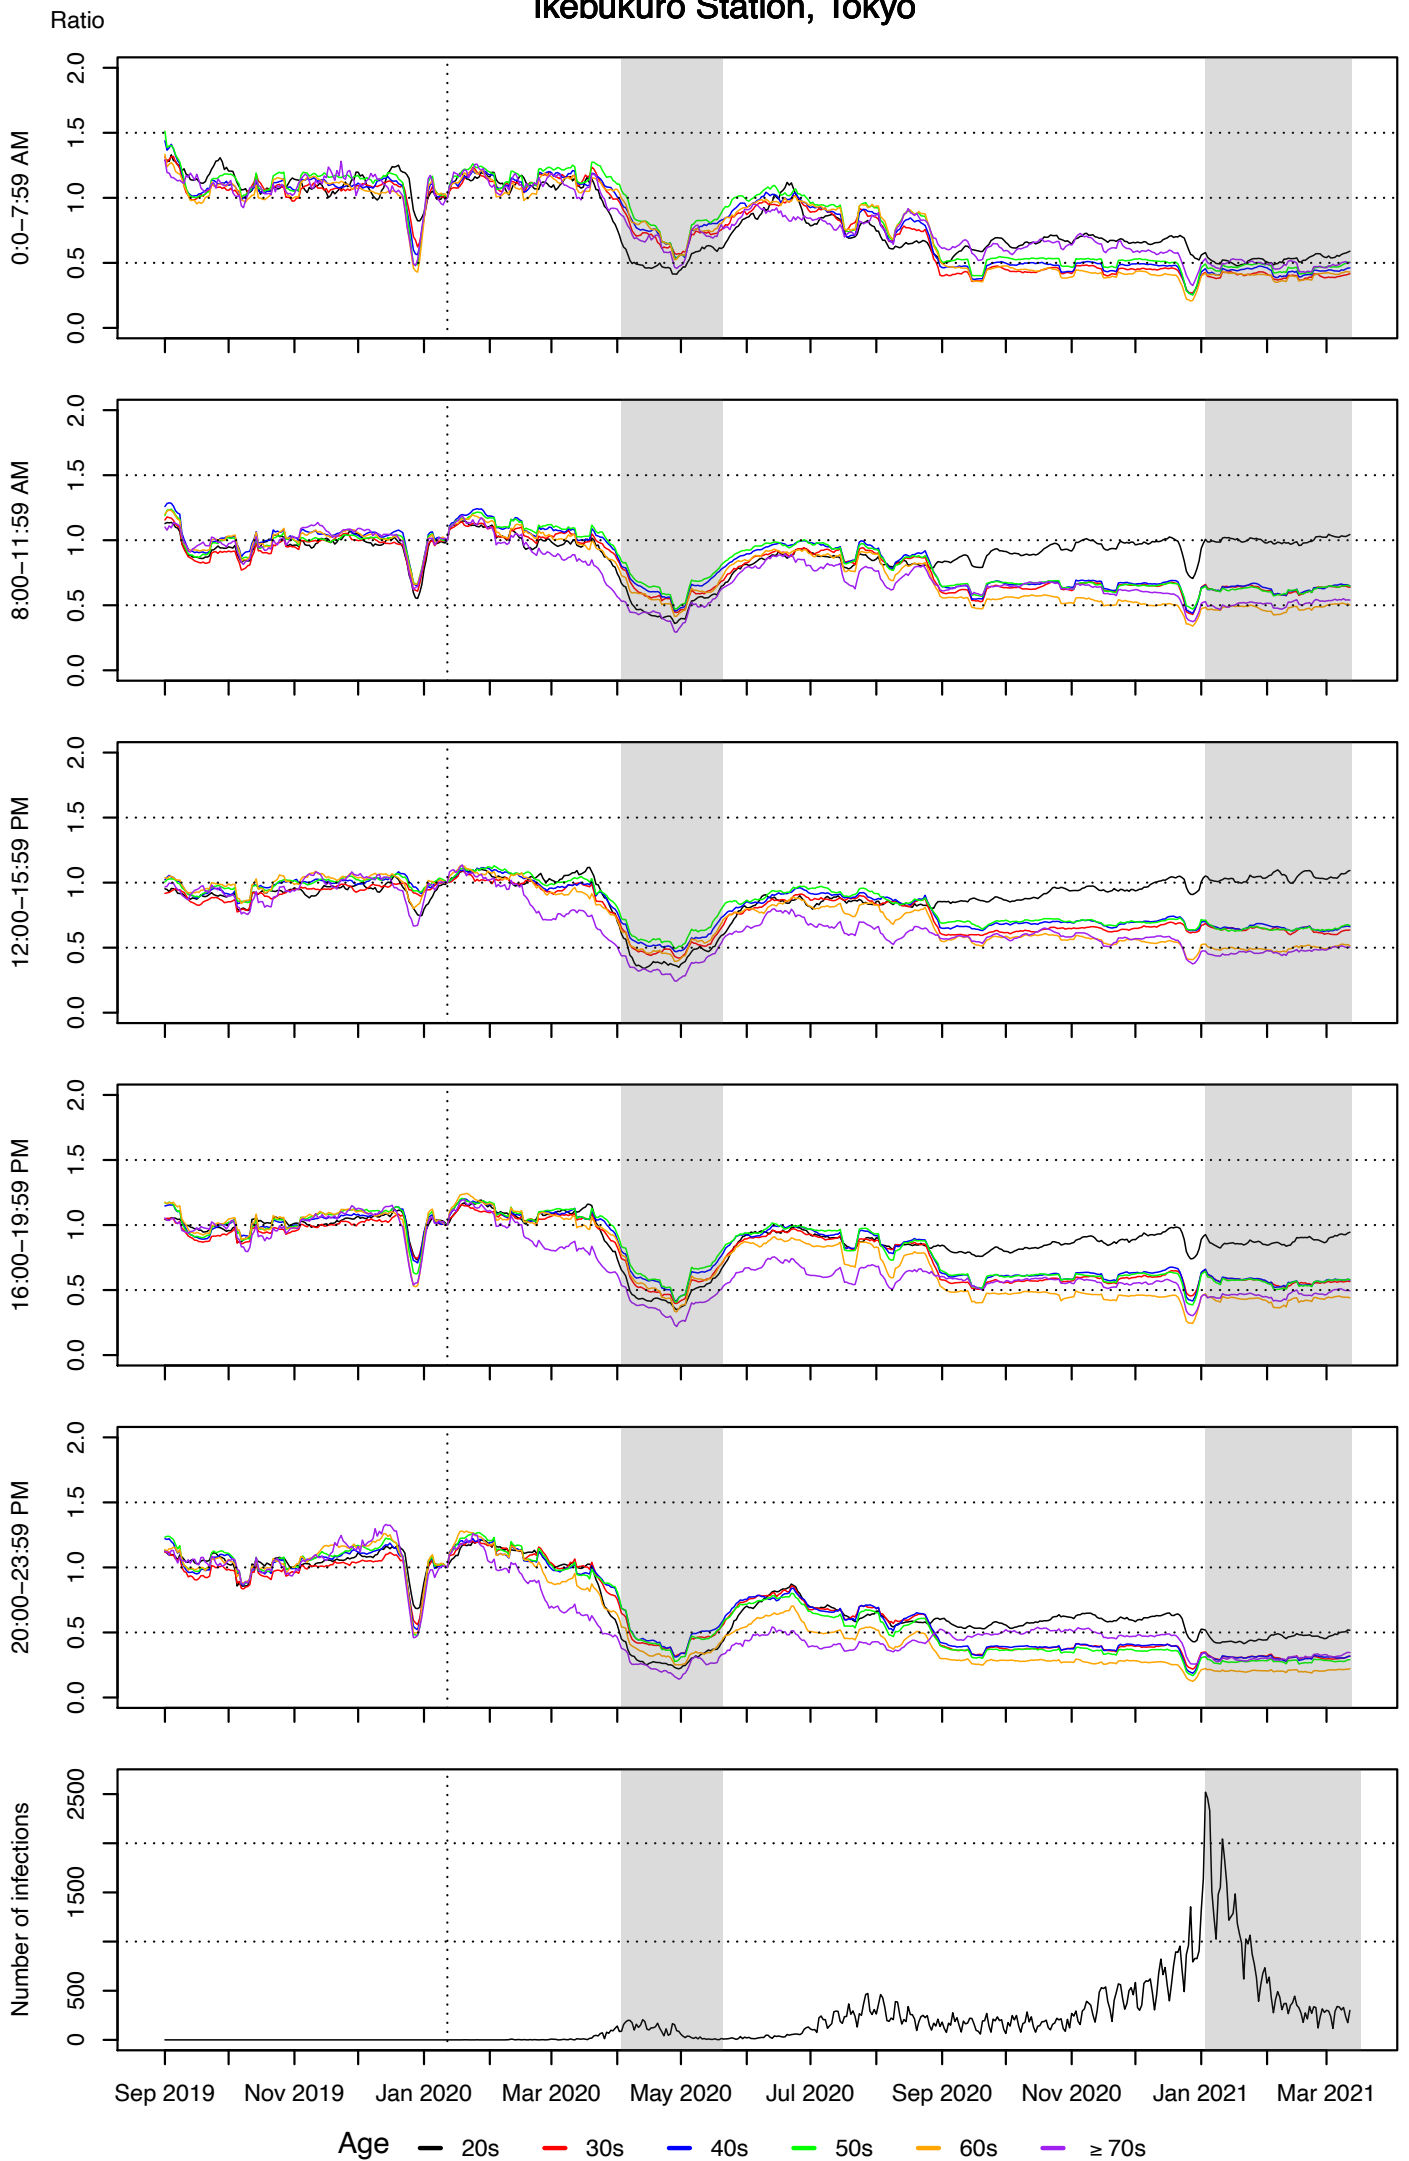



# Kawaramachi Station, Kyoto

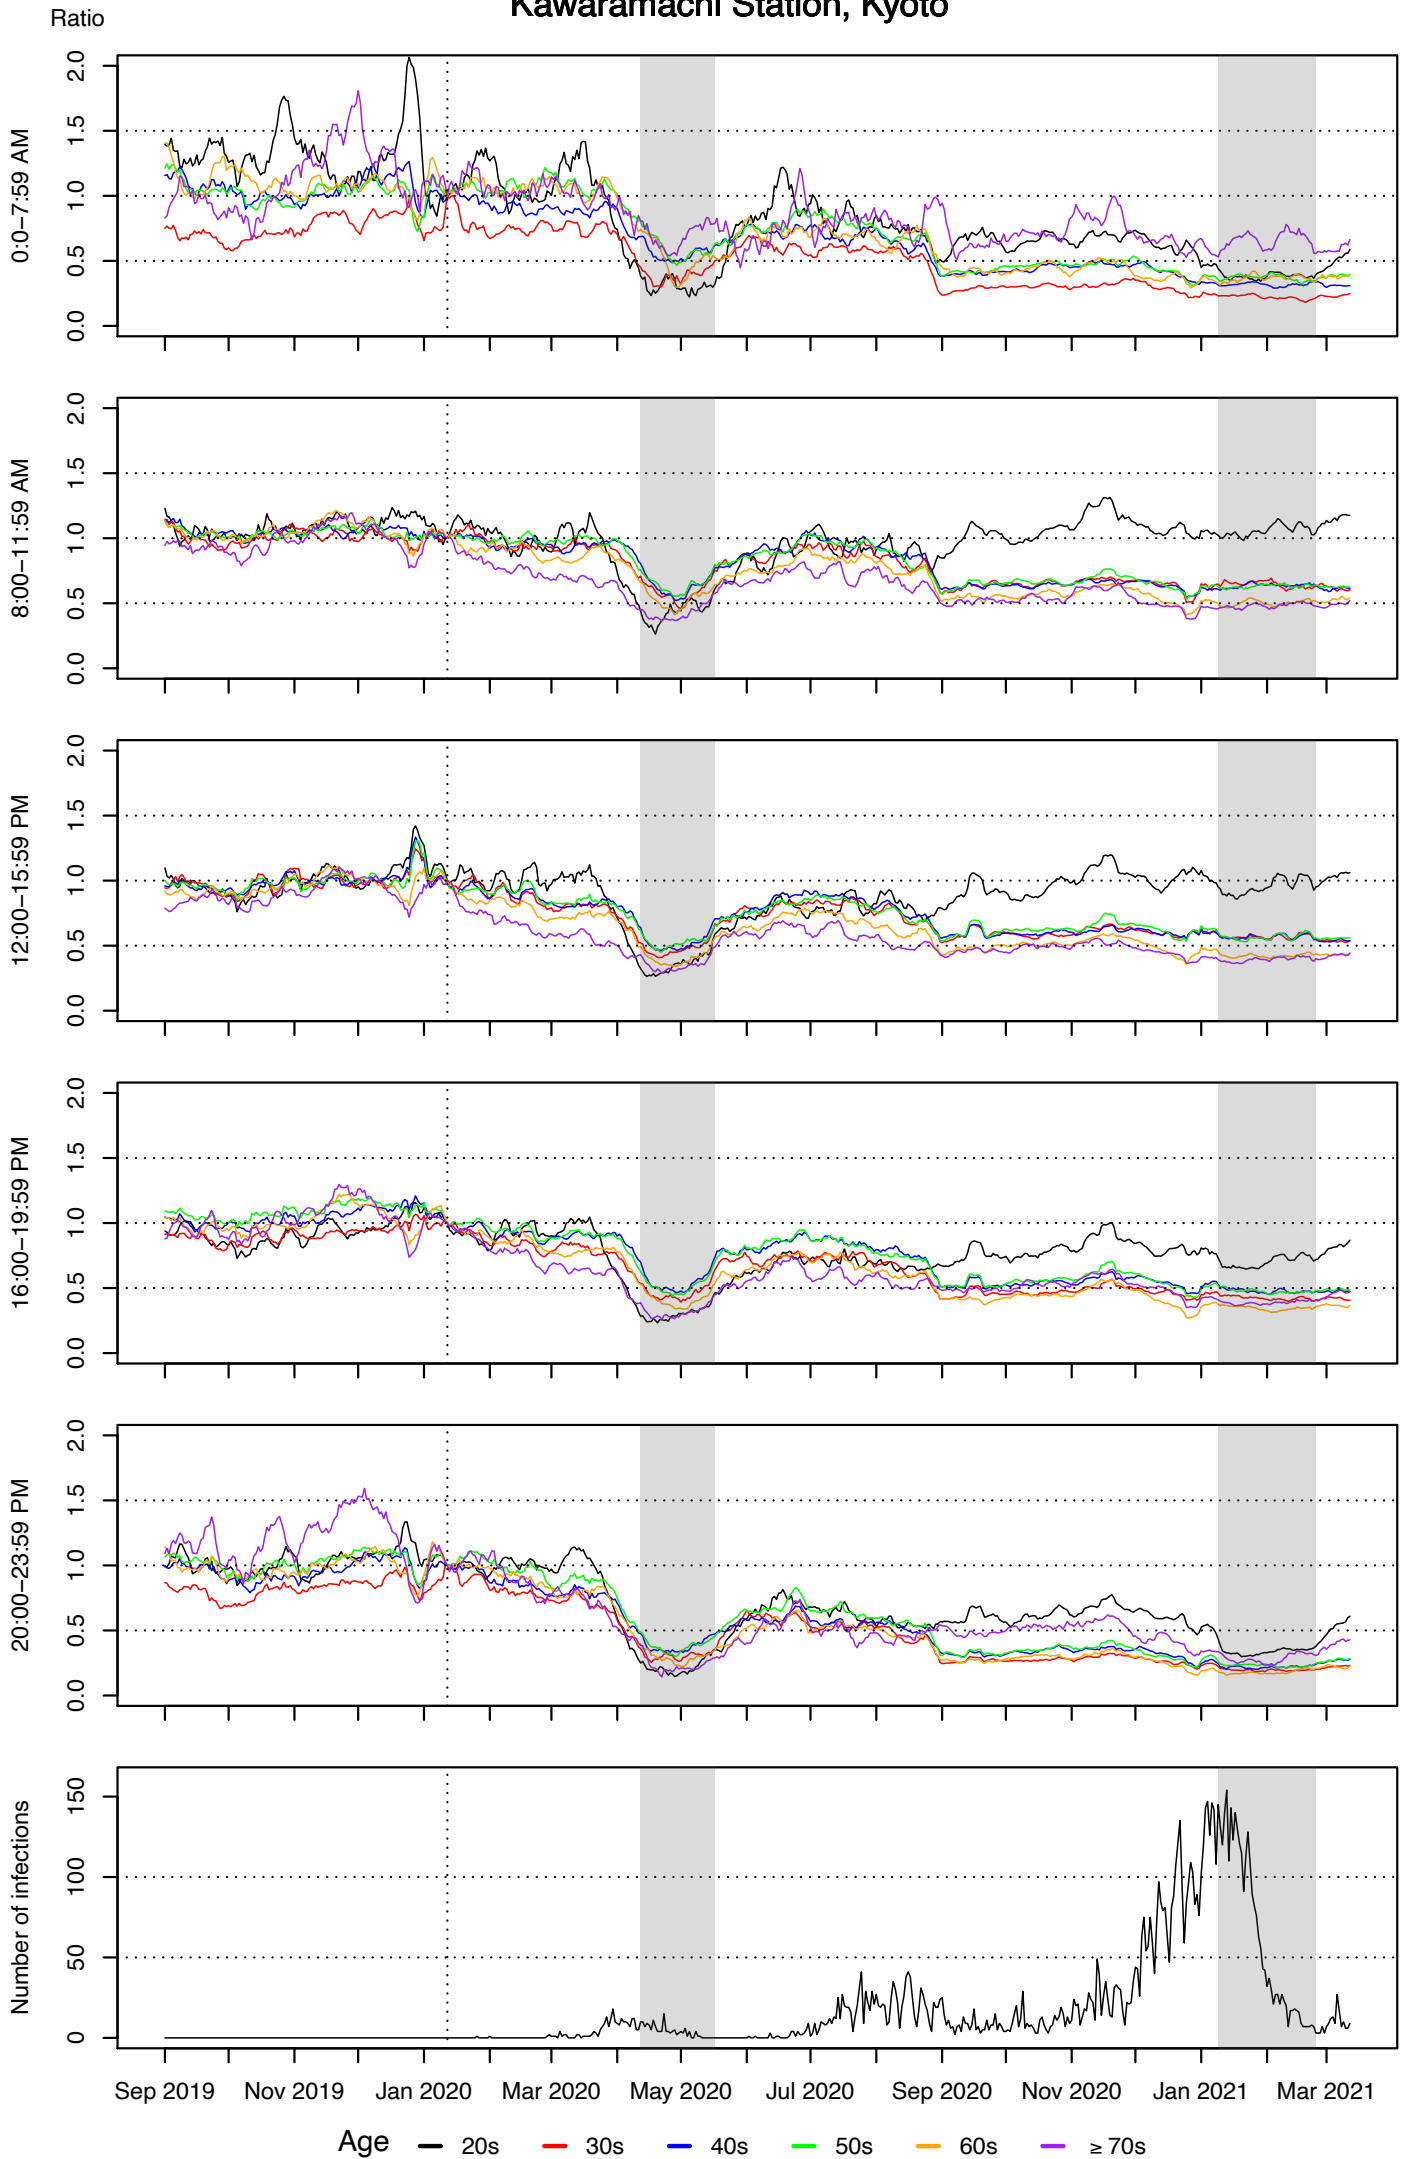

# Hamamatsu Station, Shizuoka

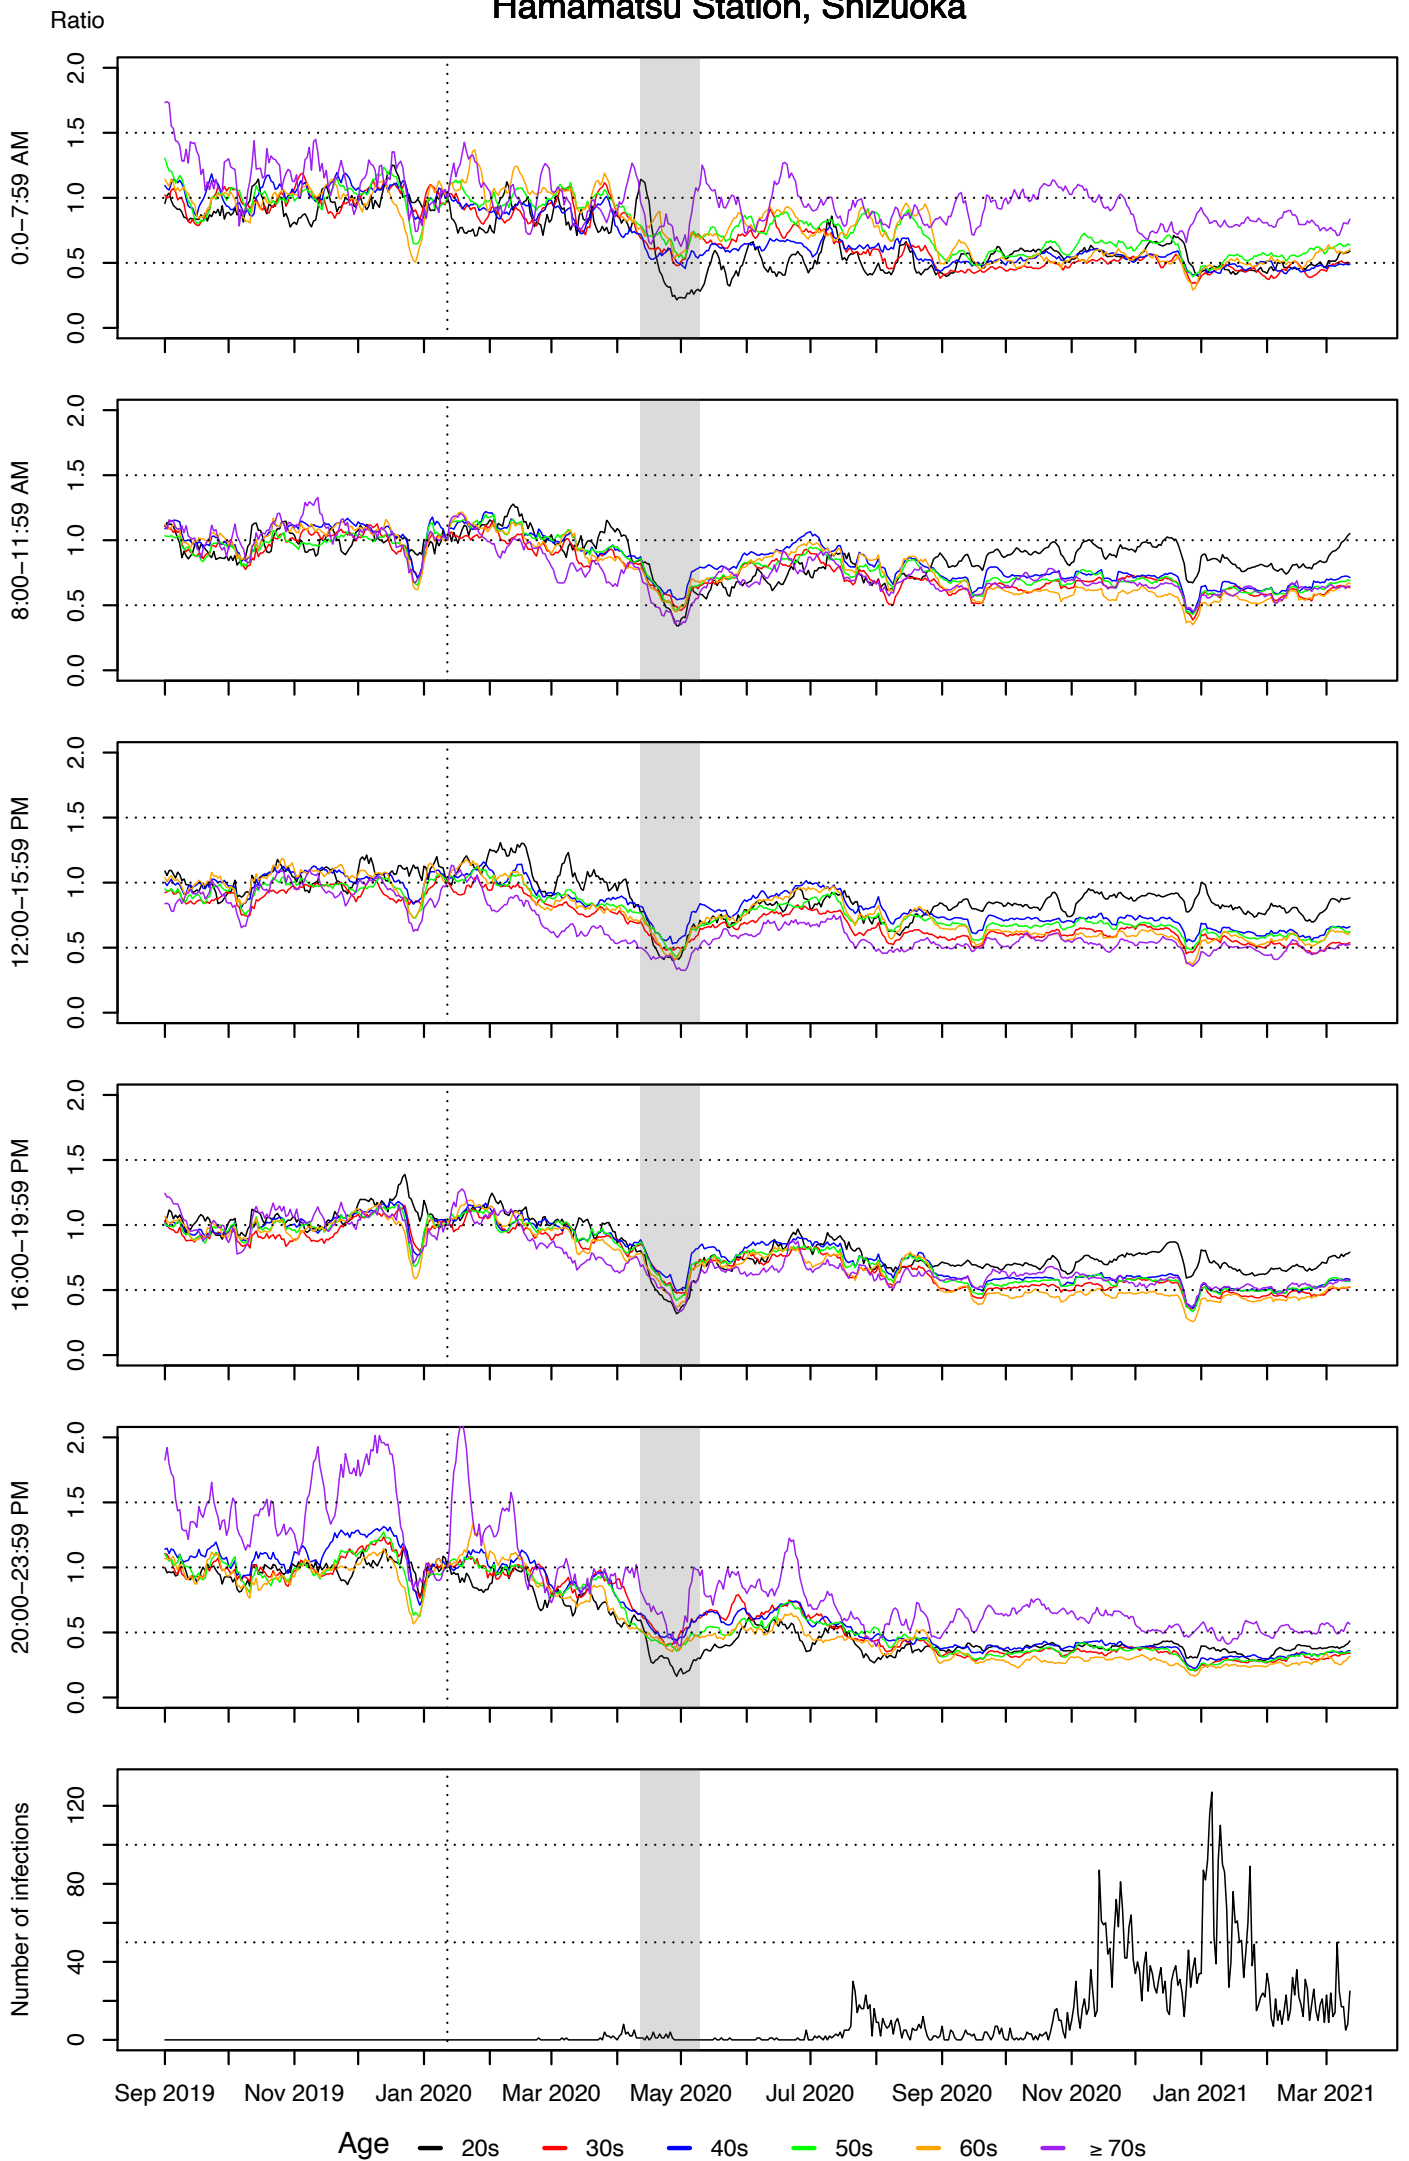

# Shibuya Center Street, Tokyo

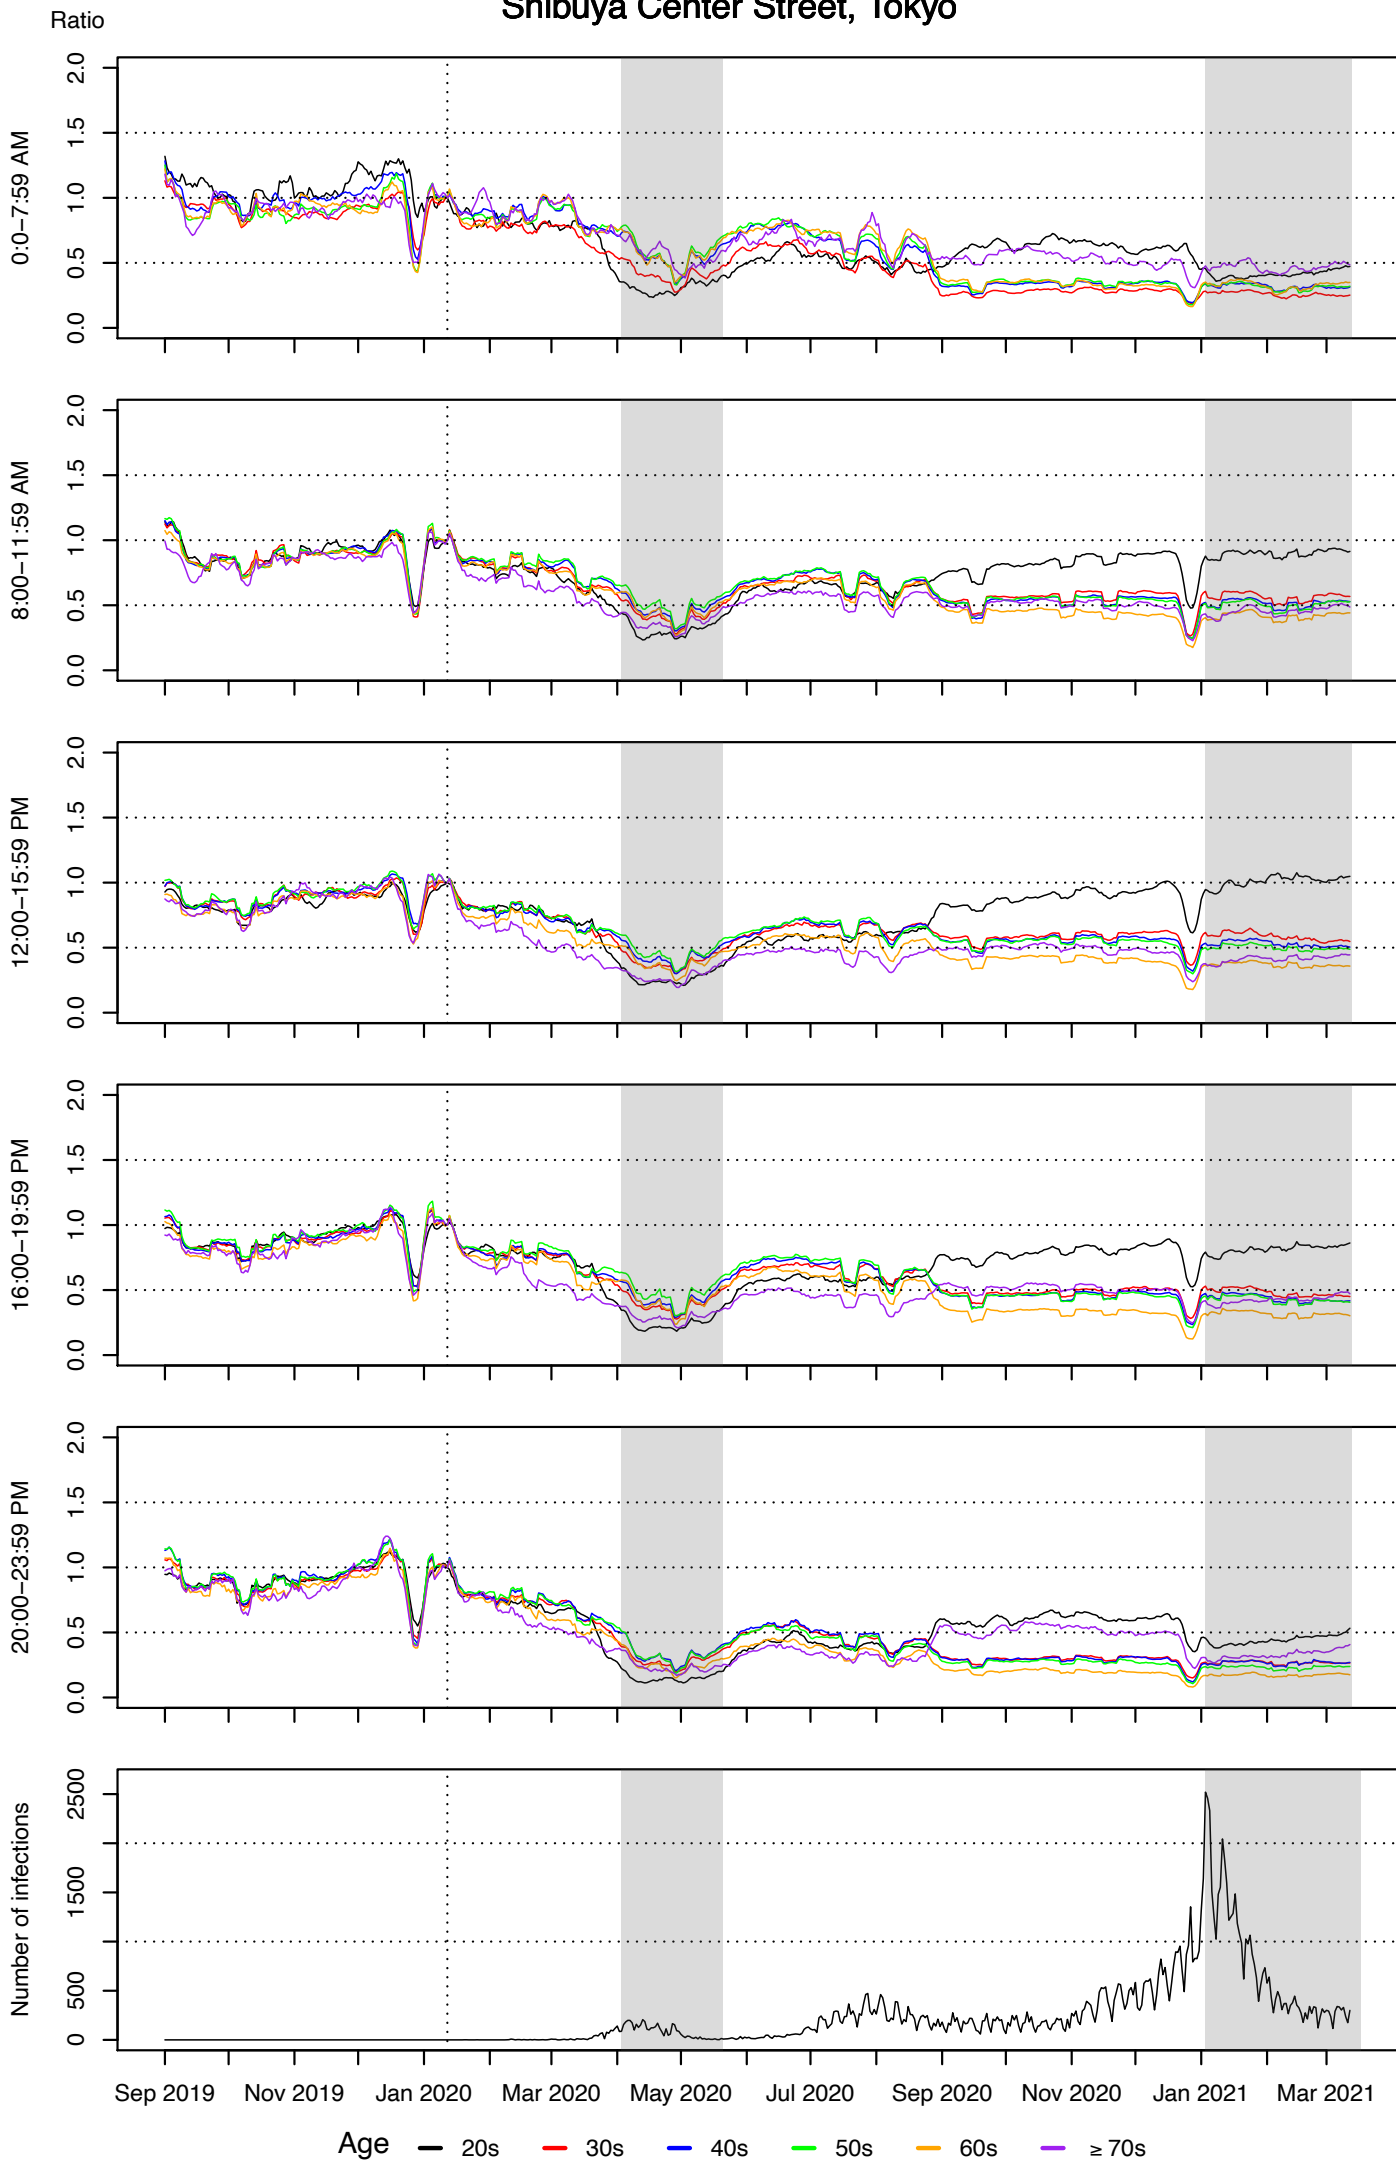

# Shibuya Station, Tokyo

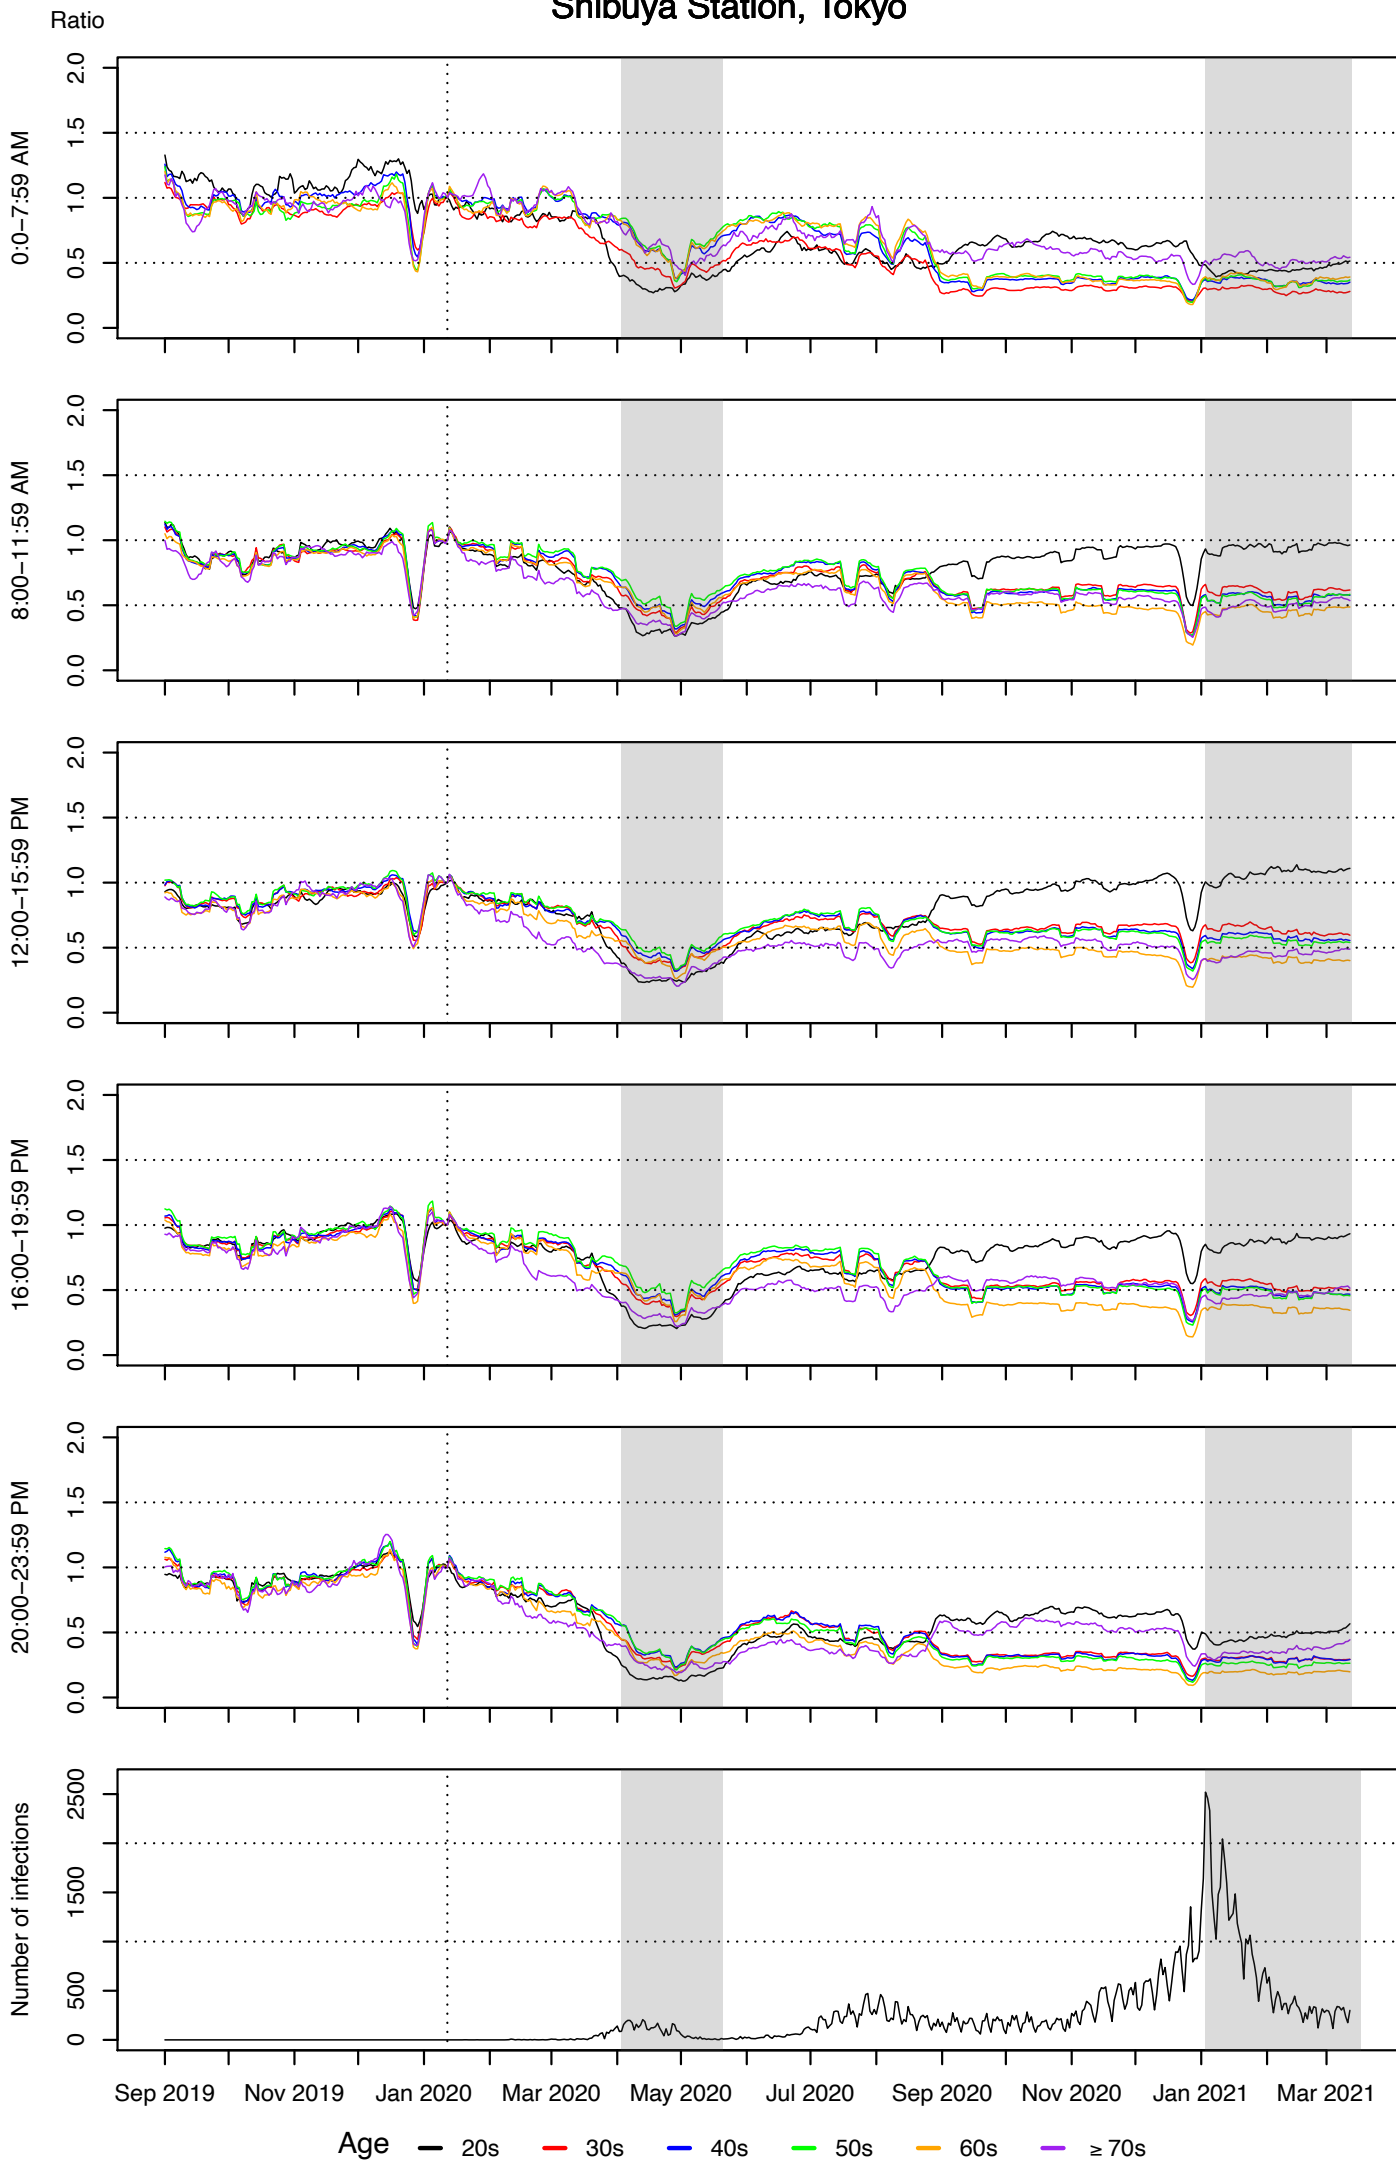

# Makishi Station, Okinawa

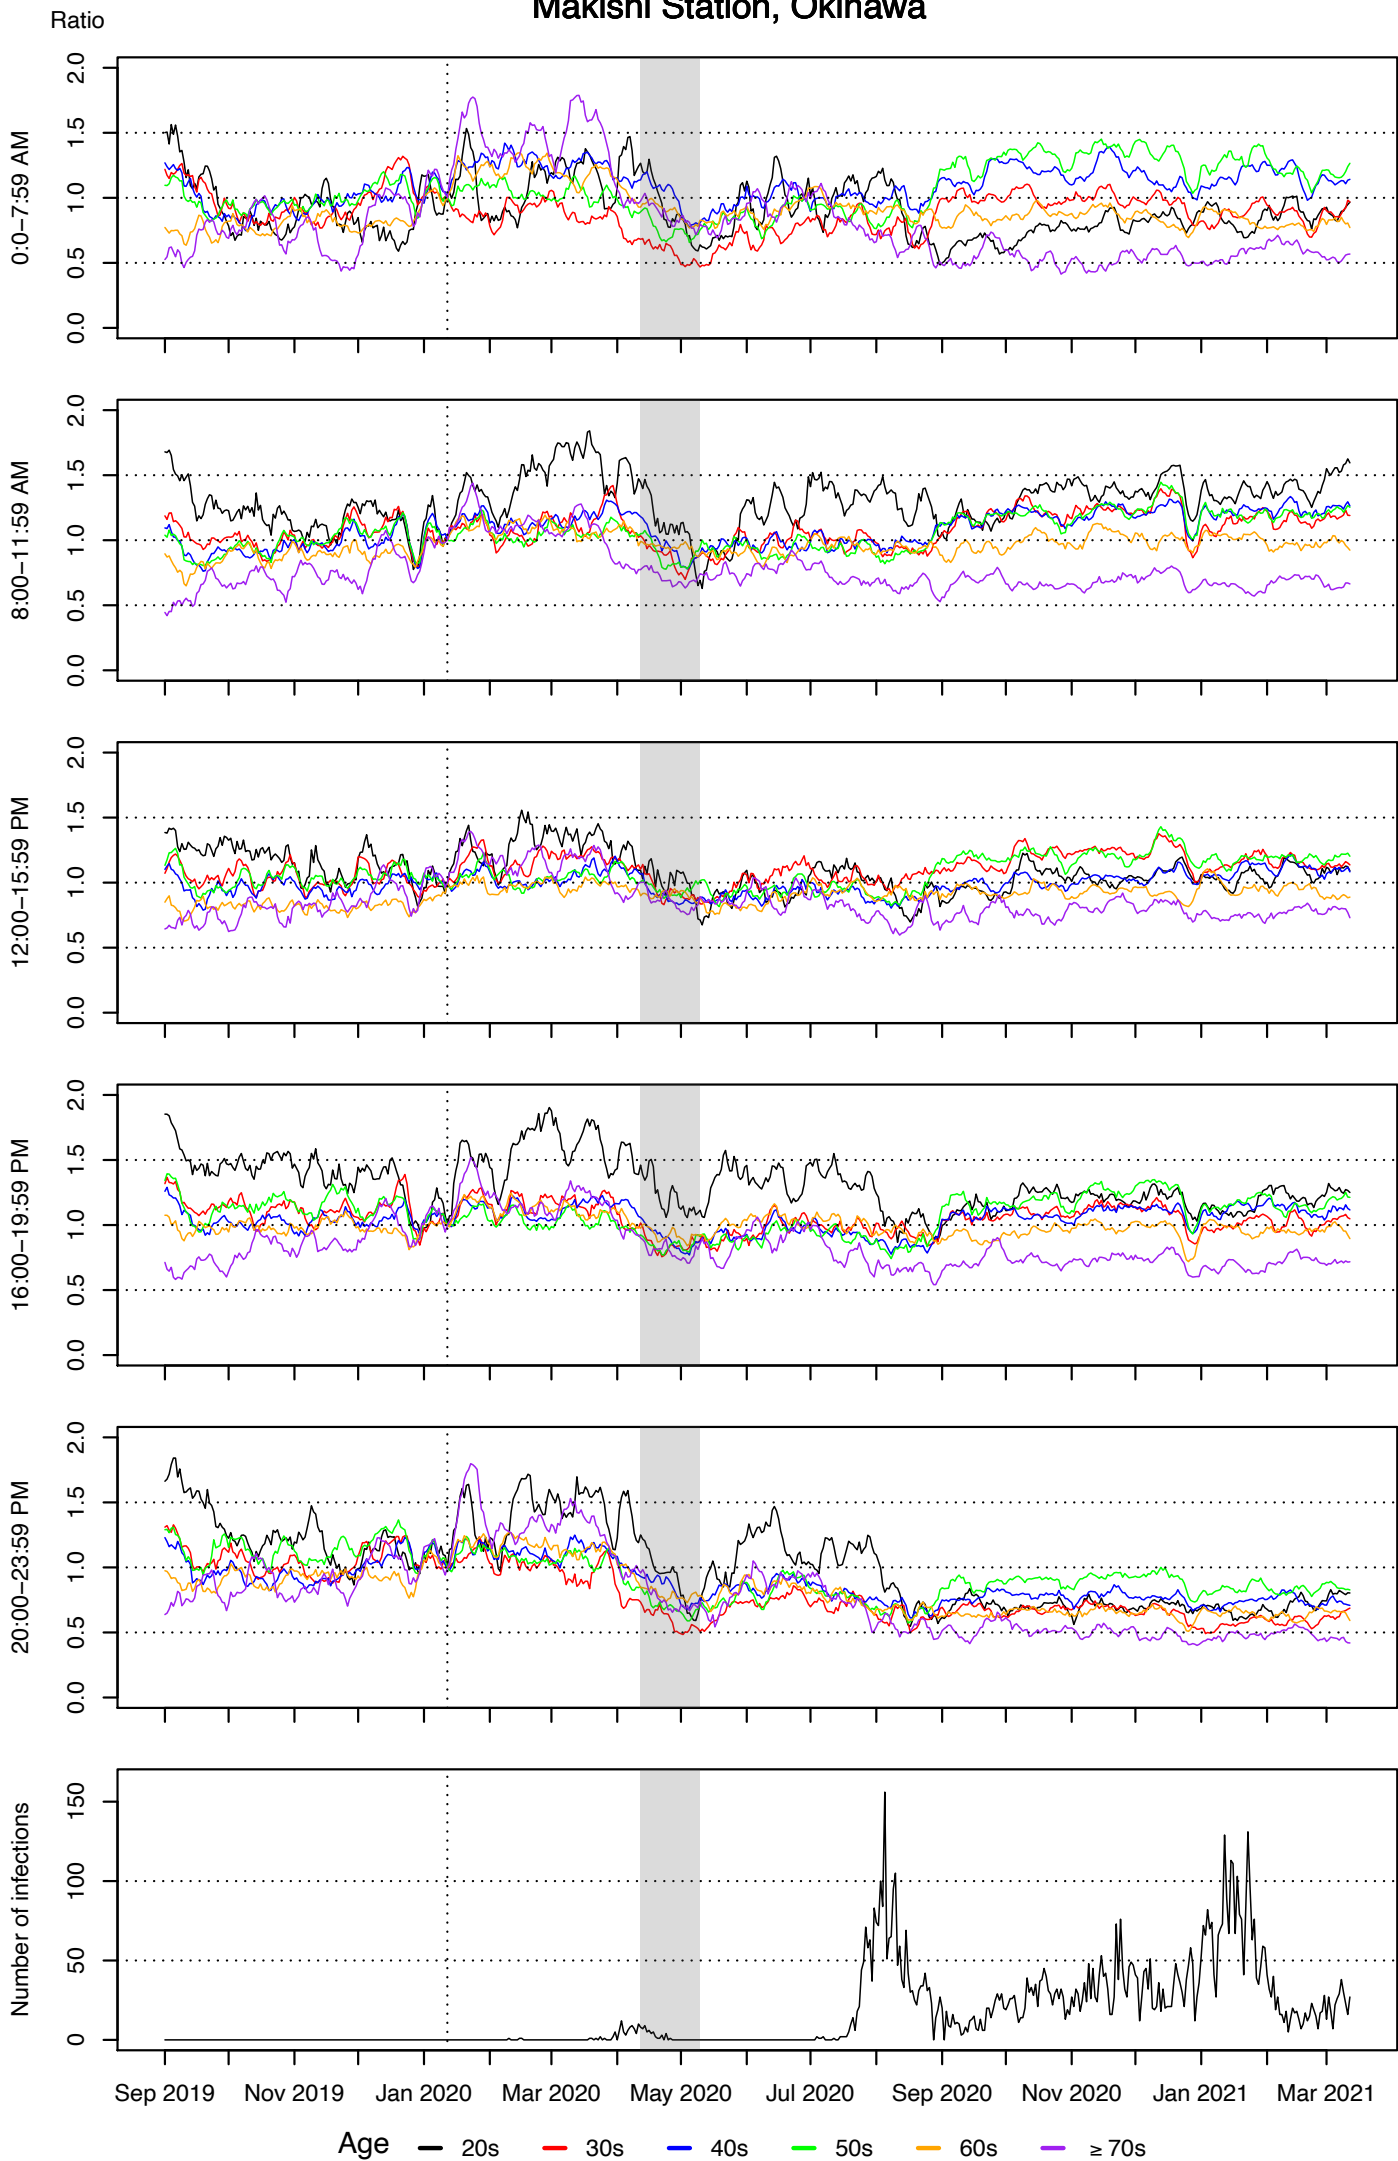

# Kawaramachi Station, Kagawa

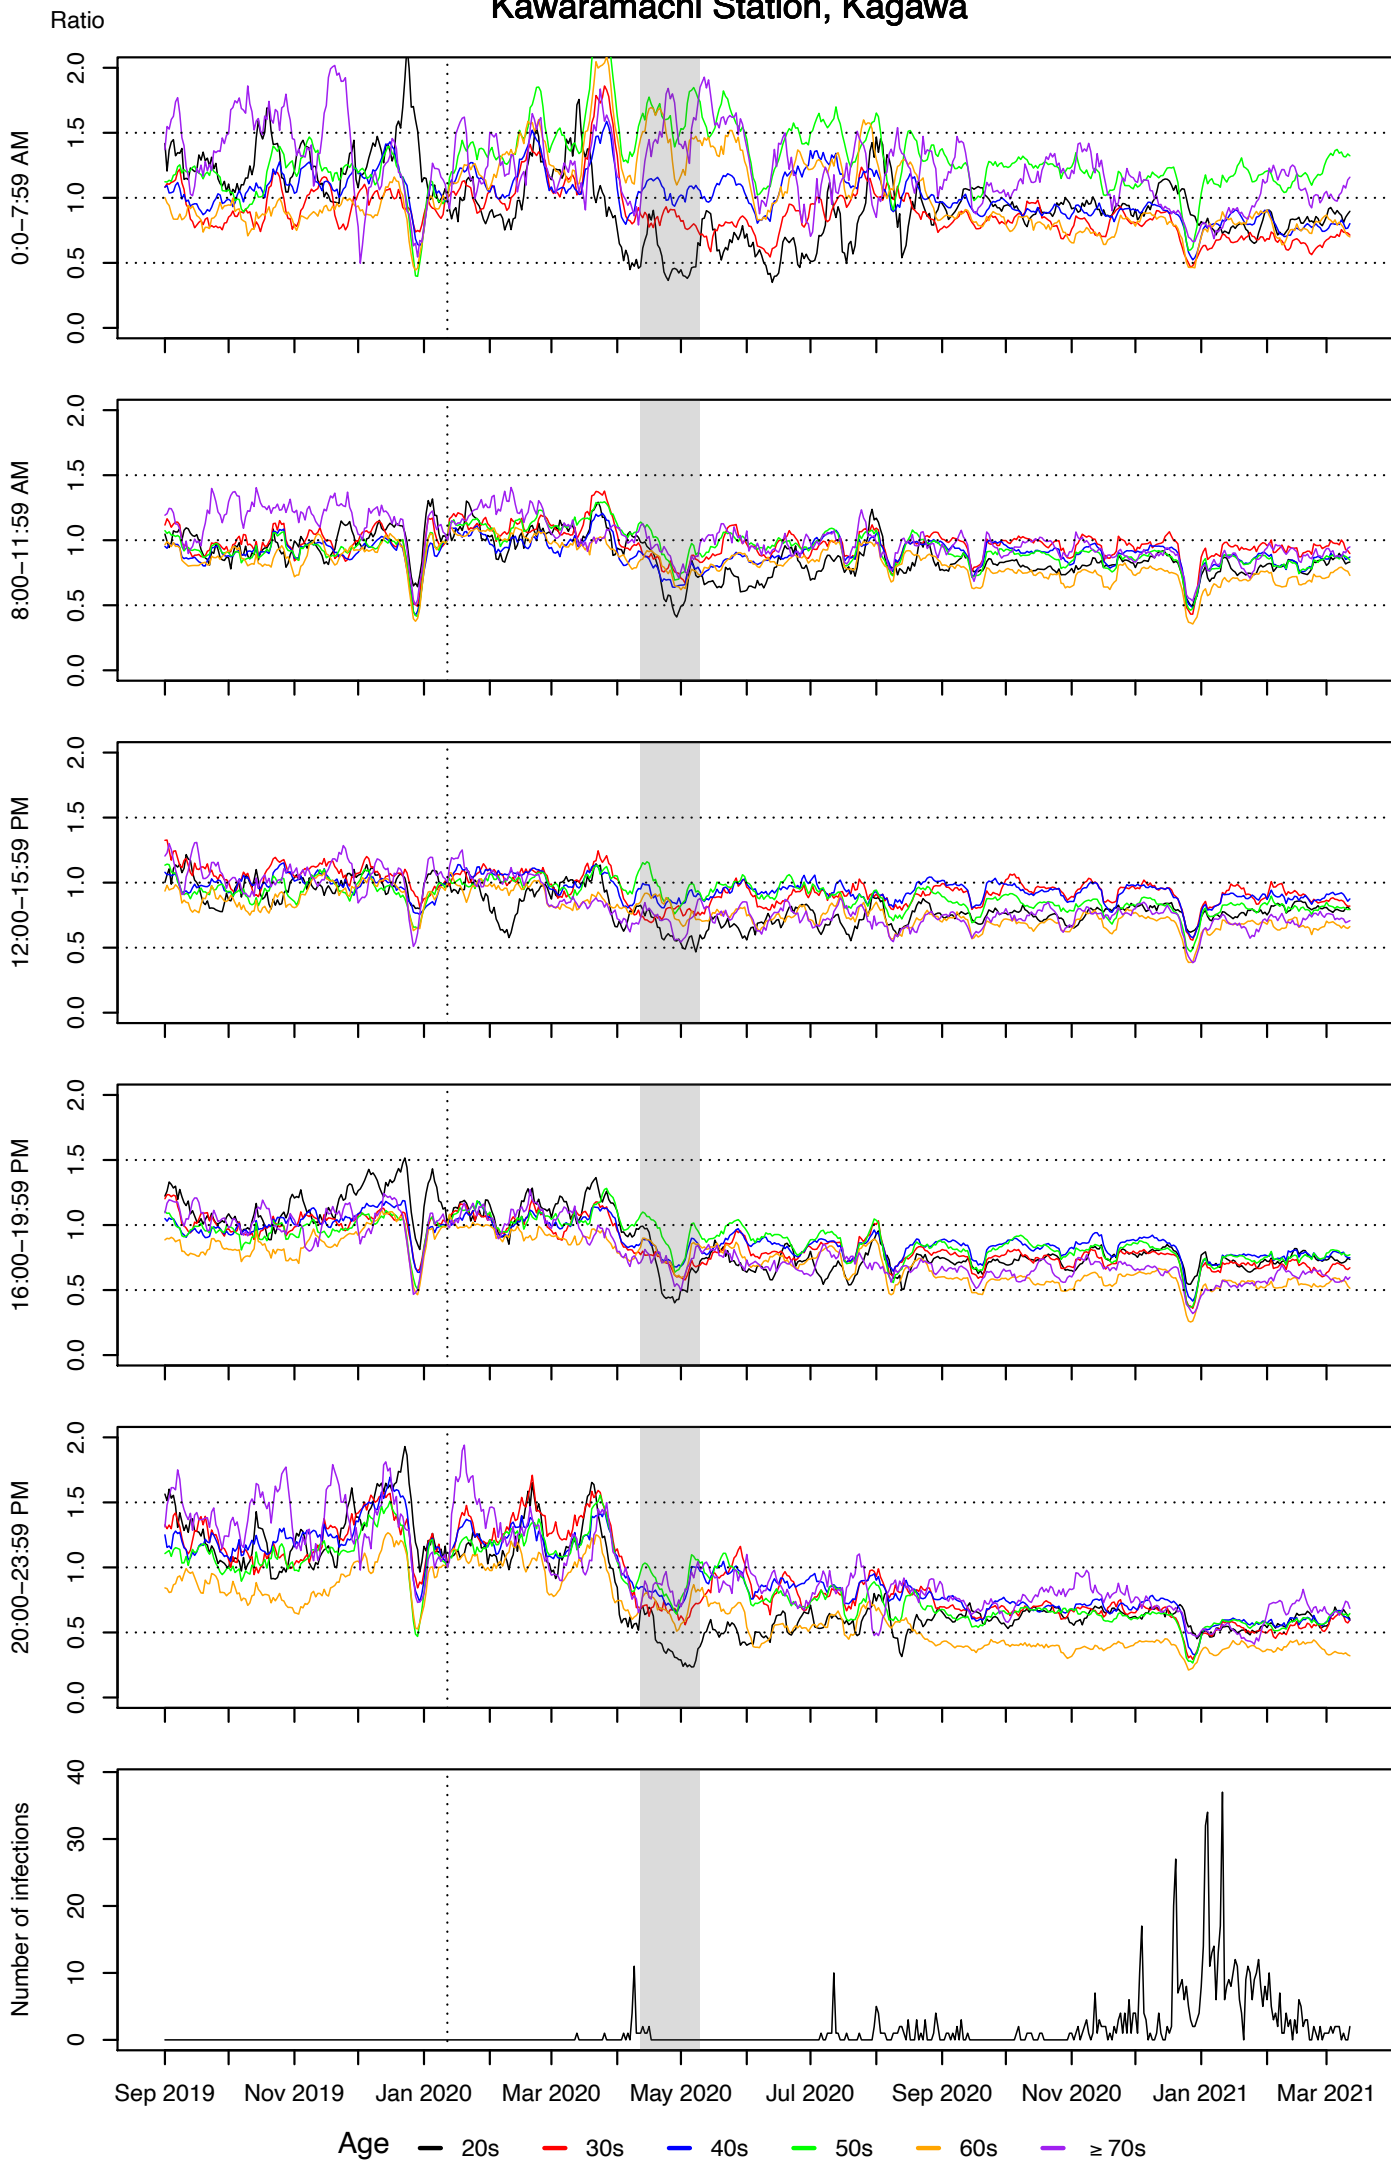



# Tamachi Station, Okayama

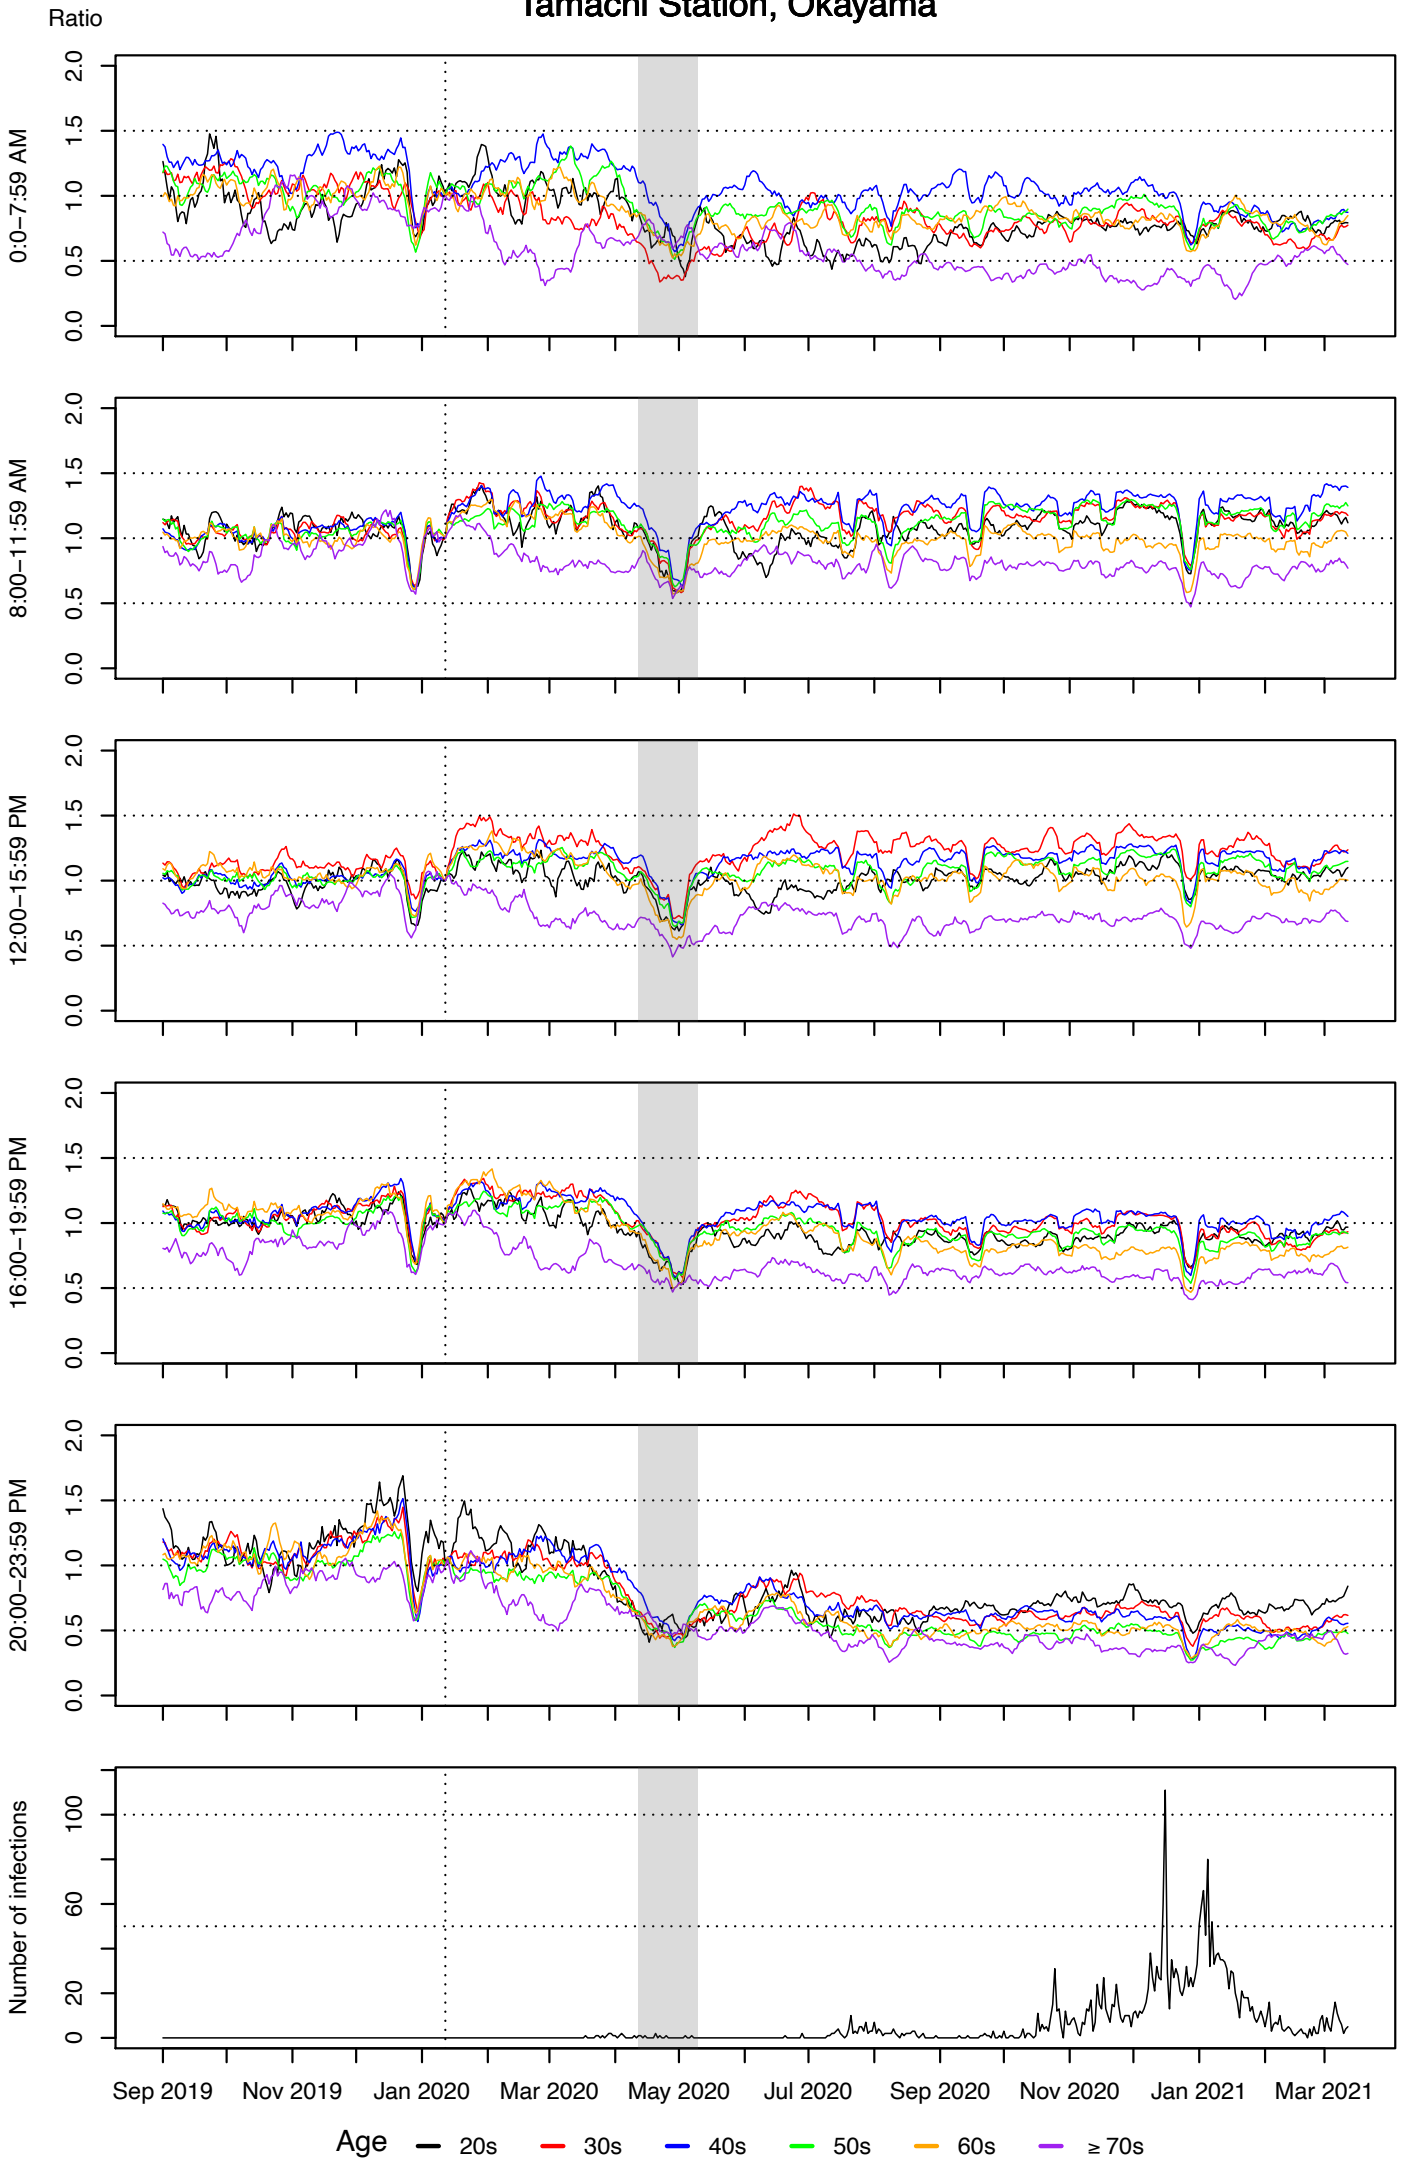

# Kanko-Dori Station, Nagasaki

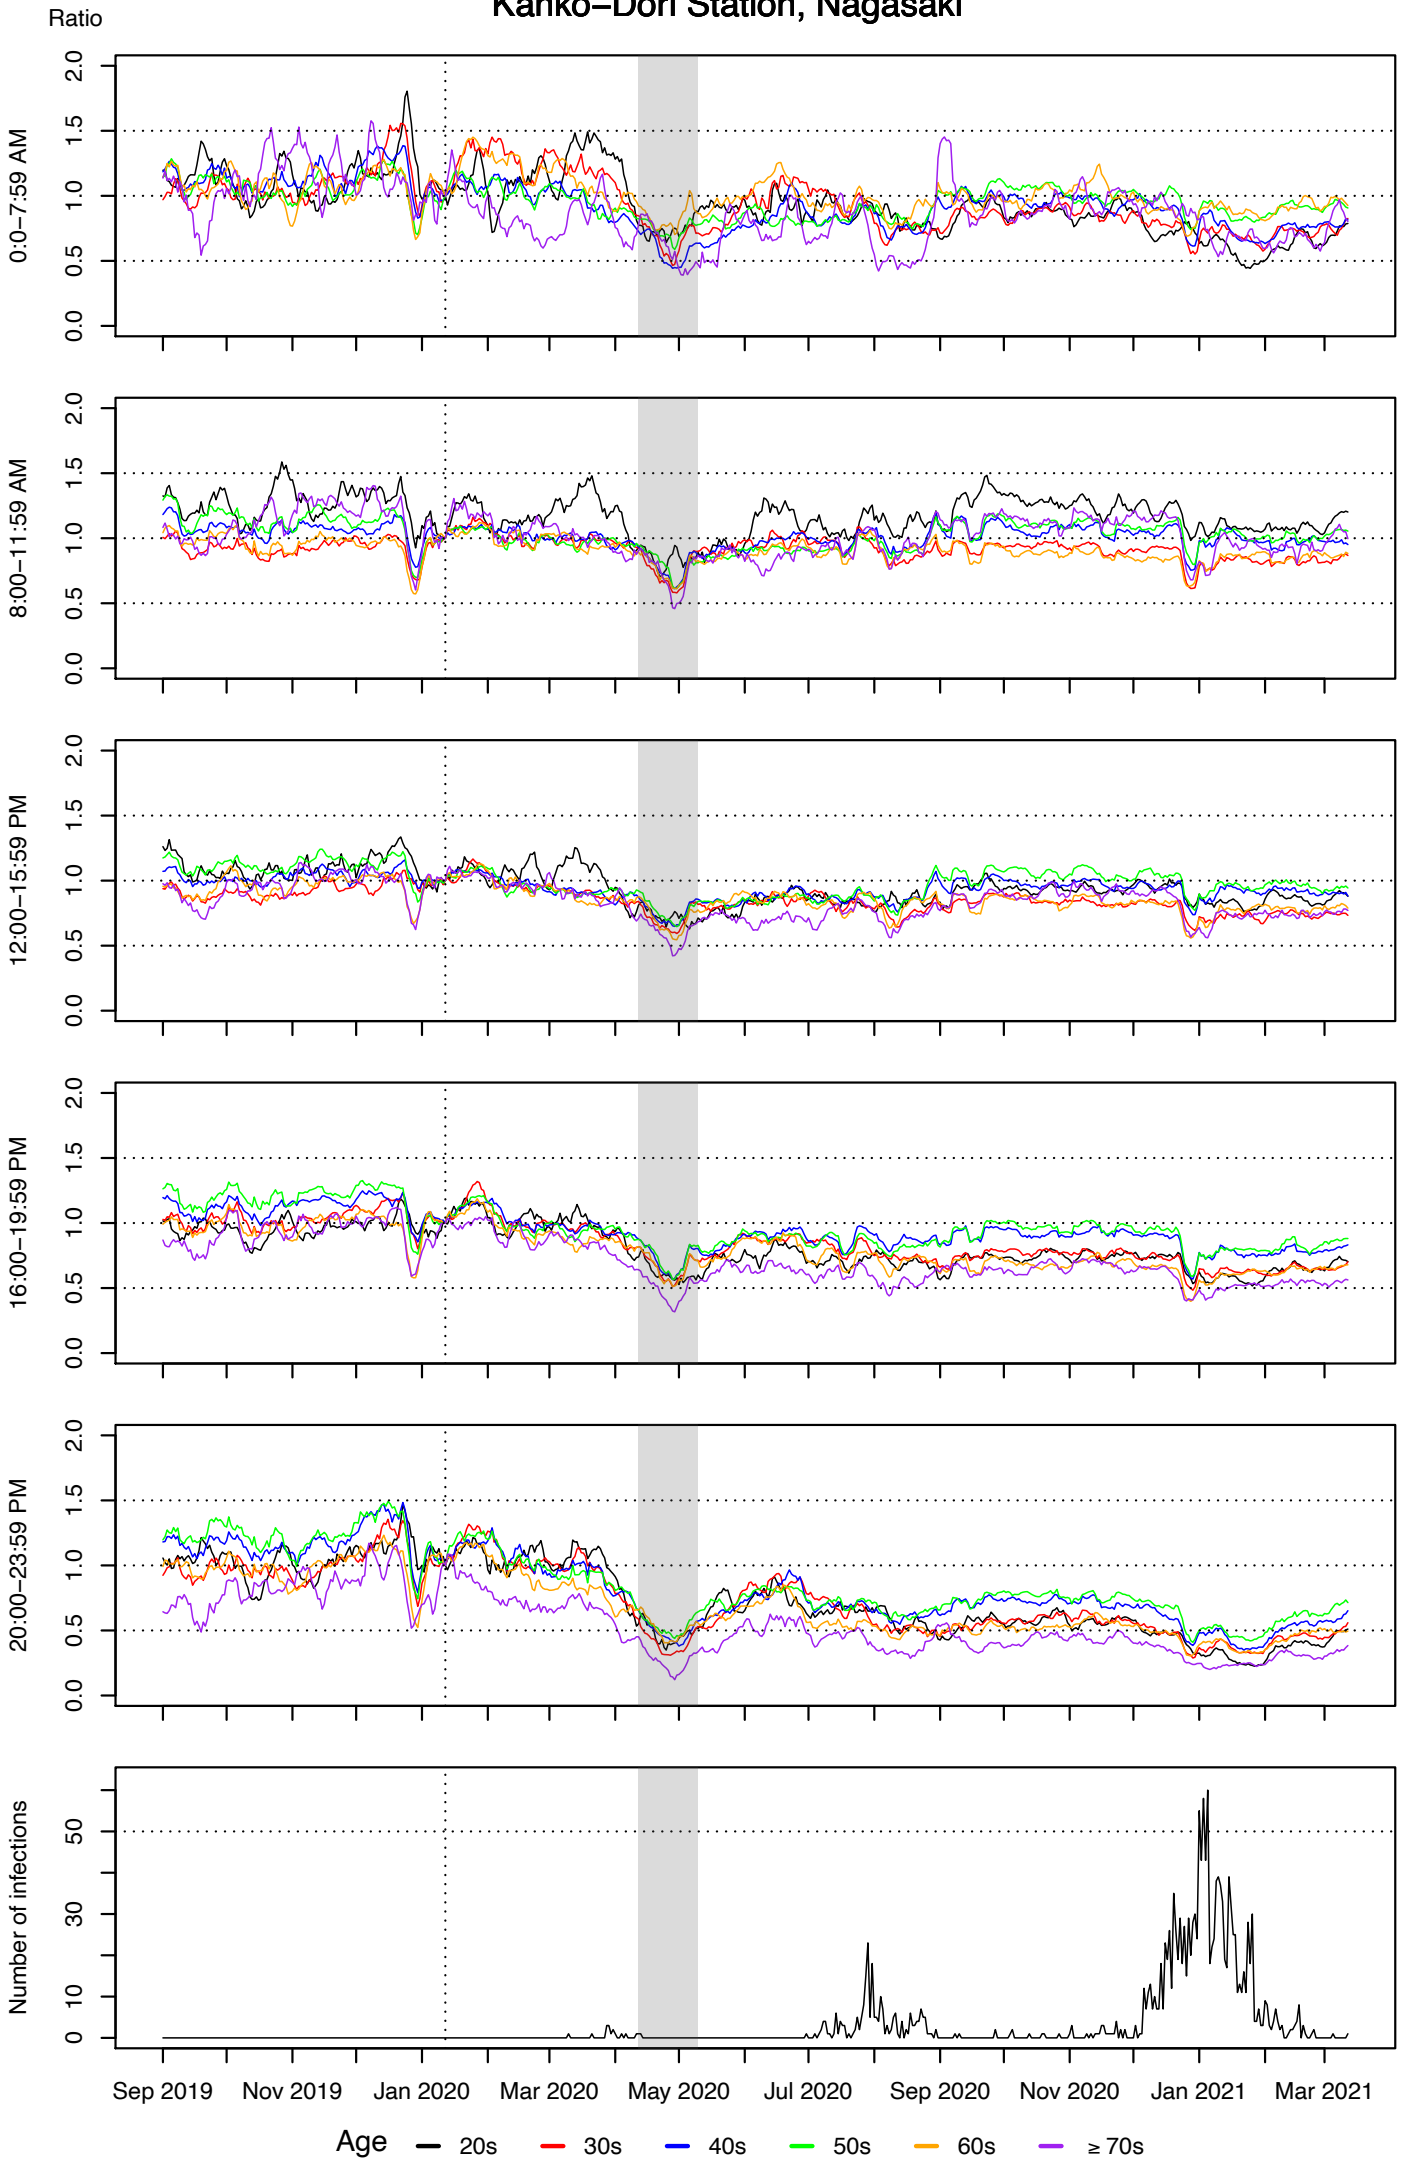



# Ginza Station, Tokyo

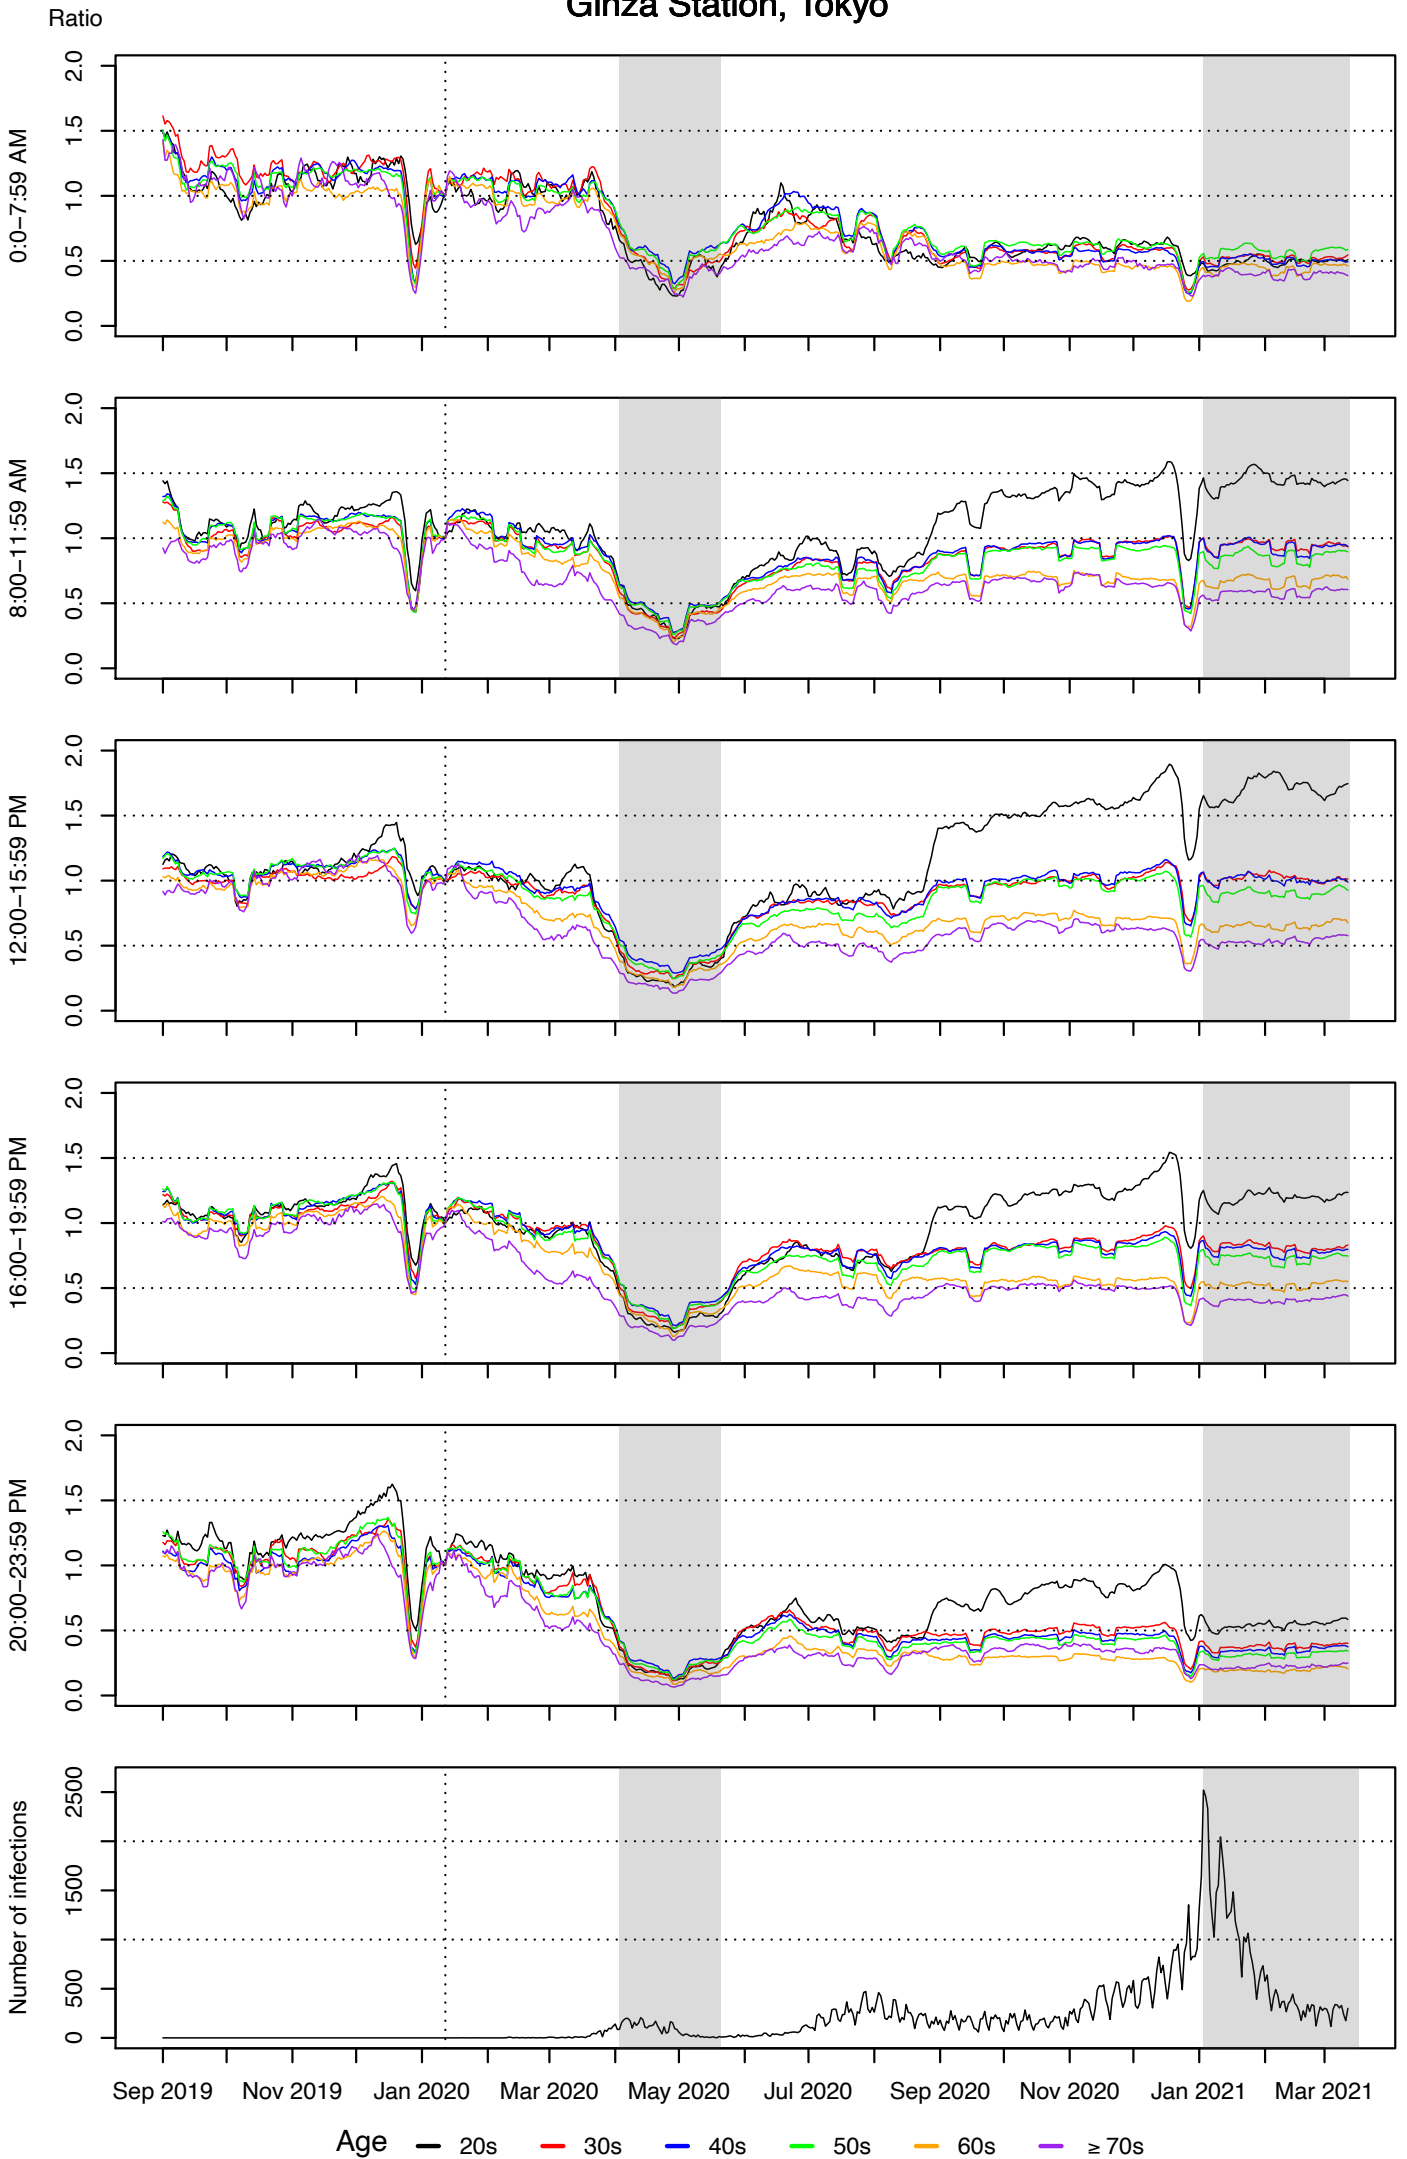

# Kannai Station, Kanagawa

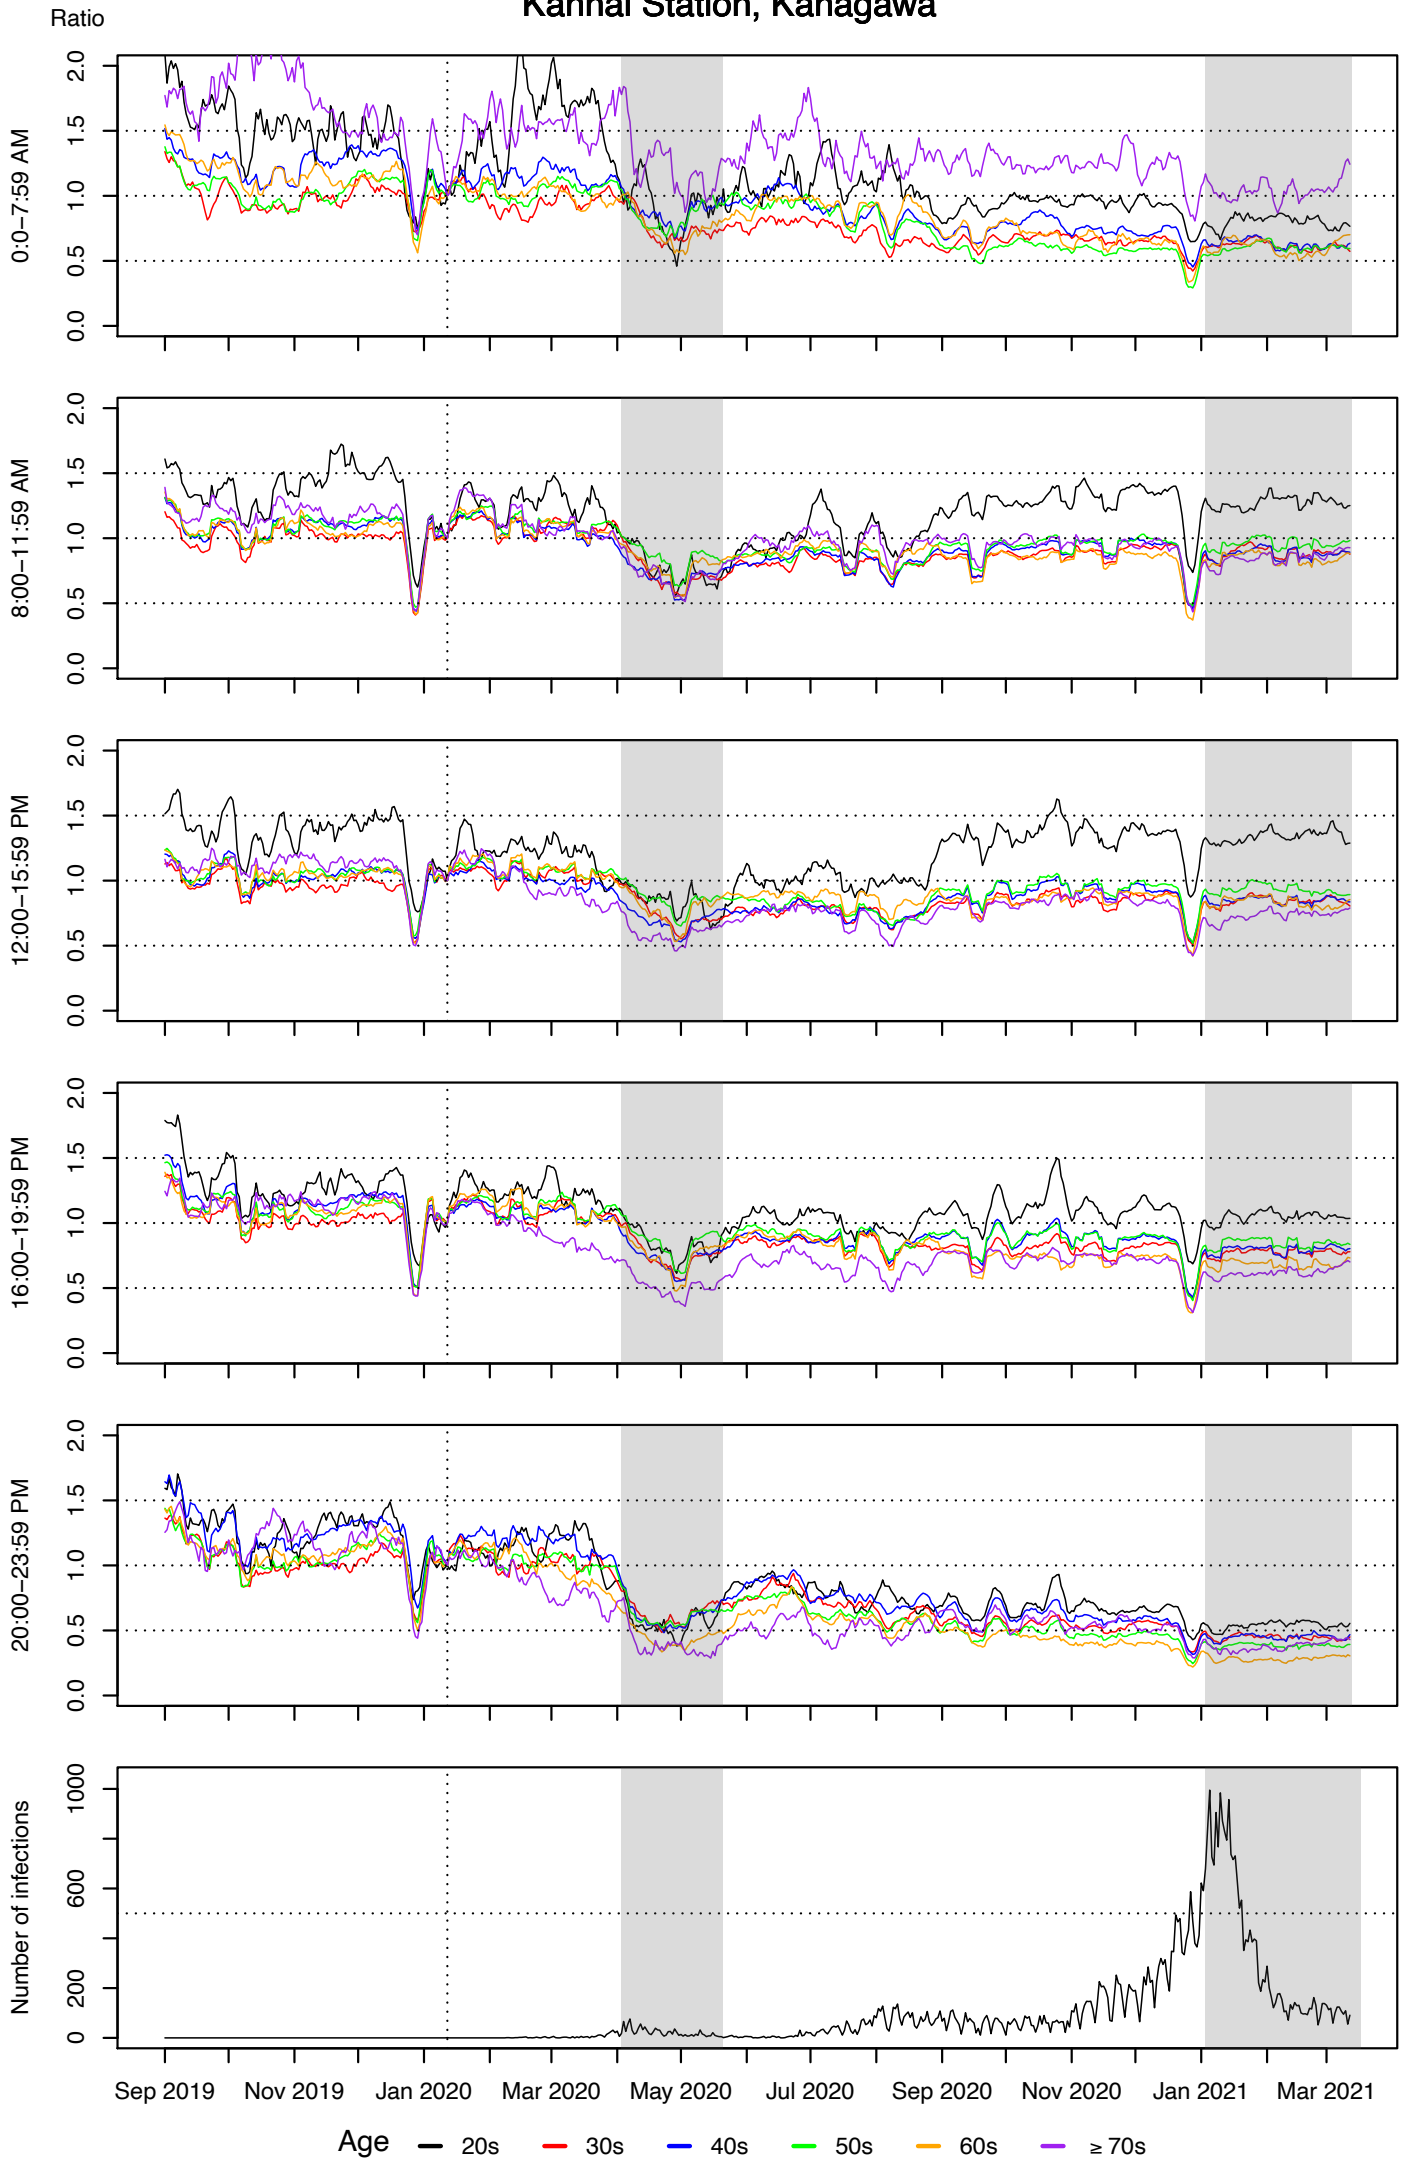

Supplement: 11524_2021_566_MOESM1_ESM.pdf [file 11524_2021_566_MOESM1_ESM.pdf]
